# Supplementary material for: Failure mode diagnosis and stabilization of an efficient reverse-bias bipolar membrane CO2 to CO electrolyzer
Source: Royal Society of Chemistry journal article supplement (doi:10.1039/d5ee01817j), 2025-01-01
Supplement: d5ee01817j2.xlsx [file d5ee01817j2.xlsx]

## Sheet: Figure 2
g)							h)							i)			j)			k)			l)
NiNC-600C		NiNC-800C		NiNC-1000C			NiNC-600C		NiNC-800C		NiNC-1000C			NiNC-1000C			NiNC-1000C			NiNC-1000C			NiNC-1000C		pyridinic	pyrrolic
dV( r)	Half pore width	dV( r)	Half pore width	dV( r)	Half pore width		P/P0	Vads	P/P0	Vads	P/P0	Vads		Binding Energy	Intensity		Binding Energy	Intensity		Binding Energy	Intensity		Binding Energy	Intensity	Intensity	Intensity
cm3A-1g-1	A	cm3A-1g-1	A	cm3A-1g-1	A			cm3 g-1		cm3 g-1		cm3 g-1		eV	a.u.		eV	a.u.		eV	a.u.		eV	a.u.	a.u.	a.u.
8.0683	0	8.0683	0	7.7133	0		0.04948	29.1856	0.05017	72.9514	0.04625	56.6953		1100	53202.9		545	2528.42		884	9262.71		410	2619.34	0	0
8.4397	0	8.4397	0	8.0683	0		0.05648	30.1326	0.07571	76.8691	0.05418	58.2917		1099	52688.7		544.9	2549.57		883.9	9300.67		409.9	2618.29	0	0
8.8282	0	8.8282	0	8.4397	0		0.06291	30.7373	0.10439	80.8778	0.06104	59.4513		1098	52220.1		544.8	2546.76		883.8	9198.54		409.8	2636.24	0	0
9.2345	0	9.2345	0	8.8282	0		0.07321	31.6048	0.13089	84.2596	0.07159	61.0654		1097	51267.3		544.7	2567.95		883.7	9349.8		409.7	2658.28	0	0
9.6595	0	9.6595	0	9.2345	0		0.0822	32.3677	0.15833	87.5695	0.0806	62.6182		1096	50925		544.6	2555.25		883.6	9269.02		409.6	2646.78	0	0
10.1041	0	10.1041	0	9.6595	0		0.09298	33.4223	0.1889	91.433	0.09166	64.199		1095	50619.9		544.5	2565.72		883.5	9273.49		409.5	2640.28	0	0
10.5692	0	10.5692	0	10.1041	0		0.1041	34.1343	0.21438	94.2632	0.10252	65.5572		1094	50316.2		544.4	2567.88		883.4	9301.07		409.4	2652.52	0	0
11.0557	0	11.0557	0	10.5692	0		0.19574	40.2698	0.24447	98.1973	0.20096	77.0867		1093	50388.4		544.3	2559.21		883.3	9374.81		409.3	2664.88	0	0
11.5646	0	11.5646	0	11.0557	0		0.29981	48.0091	0.26935	101.493	0.30035	91.7373		1092	50741.2		544.2	2533.34		883.2	9301.34		409.2	2660.74	0	0
12.0969	0	12.0969	0	11.5646	0		0.40076	54.5657	0.29504	104.694	0.39933	104.087		1091	50390.7		544.1	2550.74		883.1	9378.48		409.1	2677.98	0	0
12.6537	0	12.6537	0	12.0969	0		0.49795	61.7194	0.34516	110.952	0.49732	118.194		1090	50877.6		544	2512.73		883	9374.6		409	2668.3	0	0
13.2361	0	13.2361	0	12.6537	0		0.60041	71.0836	0.39774	117.657	0.59651	137.514		1089	50604.6		543.9	2527.24		882.9	9241.75		408.9	2630.49	0	0
13.8453	0	13.8453	0	13.2361	0		0.69701	83.2888	0.44735	123.464	0.69945	159.082		1088	50089.1		543.8	2527.07		882.8	9272.67		408.8	2680.15	0	0
14.4826	0	14.4826	0	13.8453	0		0.80228	104.417	0.49349	129.855	0.80429	199.48		1087	50851.1		543.7	2582.45		882.7	9394.62		408.7	2720.37	0	0
15.1492	0	15.1492	0	14.4826	0		0.89947	143.627	0.54423	138.695	0.89712	264.271		1086	50783.8		543.6	2586.32		882.6	9397.01		408.6	2706.22	0	0
15.8465	0.00029651	15.8465	0.0041	15.1492	0.00323		0.94768	189.431	0.59516	146.9	0.94499	348.435		1085	50900.9		543.5	2526.63		882.5	9338.92		408.5	2723.02	0	0
16.5758	0.02355	16.5758	0.01061	15.8465	0.00795		0.99293	252.134	0.64294	156.293	0.99023	544.964		1084	51223.7		543.4	2499.24		882.4	9198.73		408.4	2653.66	0	0
17.3388	0.04942	17.3388	0.02591	16.5758	0.01655		0.9857	252.688	0.69158	167.519	0.98863	547.897		1083	50975.2		543.3	2492.29		882.3	9245.37		408.3	2659.47	0	0
18.1369	0.05949	18.1369	0.0602	17.3388	0.02847		0.95127	241.606	0.74446	181.399	0.95438	502.393		1082	50351.2		543.2	2492.11		882.2	9275.69		408.2	2698.92	0	0
18.9717	0.05884	18.9717	0.07449	18.1369	0.03111		0.9036	228.327	0.79015	194.648	0.90454	415.125		1081	50251.8		543.1	2575.88		882.1	9339.05		408.1	2720.75	0	0
19.8449	0.05293	19.8449	0.10072	18.9717	0.02696		0.84825	214.457	0.84068	215.91	0.85181	347.037		1080	51283.3		543	2492.24		882	9323.63		408	2709.9	0	0
20.7583	0.03127	20.7583	0.13076	19.8449	0.02219		0.80216	207.989	0.88724	238.951	0.79958	311.934		1079	50754		542.9	2512.4		881.9	9326.17		407.9	2686.18	0	0
21.7138	0.01566	21.7138	0.05003	20.7583	0.01747		0.69659	198.206	0.9366	275.981	0.6961	269.46		1078	50679.8		542.8	2474.26		881.8	9341.02		407.8	2701.53	0	0
22.7132	0.01099	22.7132	0.01731	21.7138	0.01408		0.5989	188.963	0.98705	362.836	0.60436	241.579		1077	51019.4		542.7	2535.64		881.7	9469.82		407.7	2729.12	0	0
23.7586	0.00594	23.7586	0.00736	22.7132	0.01361		0.50179	180.459	0.93819	345.916	0.50376	211.66		1076	50736.5		542.6	2532.63		881.6	9522.83		407.6	2719.22	0	0
24.8522	0.00467	24.8522	0.00463	23.7586	0.01236		0.39603	63.6862	0.87584	333.392	0.39633	115.588		1075	51445.2		542.5	2509.72		881.5	9381.26		407.5	2782.42	0	0
25.9961	0.00377	25.9961	0.00403	24.8522	0.01099		0.29862	54.3582	0.82342	328.47	0.30234	100.228		1074	50977.2		542.4	2548.71		881.4	9438.05		407.4	2783.56	0	0
27.1926	0.00321	27.1926	0.00315	25.9961	0.0101		0.19945	46.0513	0.75974	320.681	0.20402	84.5315		1073	50727.2		542.3	2573.79		881.3	9586.59		407.3	2771.61	0	0
28.4443	0.00281	28.4443	0.0023	27.1926	0.00925		0.15347	42.1325	0.71179	314.394	0.14258	77.1519		1072	51313.1		542.2	2532.08		881.2	9422.17		407.2	2748.71	0	0
29.7535	0.00211	29.7535	0.00162	28.4443	0.00824		0.10349	37.7035	0.65427	308.761	0.10196	69.3282		1071	51234.3		542.1	2529.98		881.1	9601.79		407.1	2746.12	0	0
31.123	0.00272	31.123	0.00195	29.7535	0.00659				0.59157	300.684				1070	51706		542	2525.15		881	9618.32		407	2769.85	0	0
32.5555	0.00096183	32.5555	0.00178	31.123	0.00685				0.53451	291.707				1069	51764.7		541.9	2548.36		880.9	9610.98		406.9	2765.77	0	0
34.054	0.00164	34.054	0.00204	32.5555	0.00428				0.48546	194.944				1068	51694.8		541.8	2524.17		880.8	9616.95		406.8	2807.07	0	0
35.6214	0.00136	35.6214	0.00213	34.054	0.00453				0.42406	128.29				1067	52263.3		541.7	2503.81		880.7	9562.83		406.7	2803.31	0	0
37.261	0.00142	37.261	0.00194	35.6214	0.00585				0.36298	118.584				1066	51938.9		541.6	2558.08		880.6	9577.06		406.6	2827.56	0	0
38.976	0.00133	38.976	0.00186	37.261	0.00608				0.3171	112.934				1065	51140.2		541.5	2536.2		880.5	9733.66		406.5	2821.33	0	0
40.77	0.00104	40.77	0.00146	38.976	0.00605				0.24964	103.743				1064	51749		541.4	2565.12		880.4	9707.37		406.4	2818.54	0	0
42.6465	0.00133	42.6465	0.00114	40.77	0.00608				0.19439	95.9096				1063	51644.7		541.3	2569.57		880.3	9653.73		406.3	2769.94	0	0
44.6095	0.00135	44.6095	0.00104	42.6465	0.00717									1062	52199.3		541.2	2527.44		880.2	9850.33		406.2	2790.64	0	0
46.6628	0.00119	46.6628	0.00075446	44.6095	0.00693									1061	52366		541.1	2545.98		880.1	9602.64		406.1	2742.89	0	0
48.8105	0.0007493	48.8105	0.00045833	46.6628	0.00636									1060	52616.7		541	2570.53		880	9653.81		406	2778.78	0	0
51.0572	0.0013	51.0572	0.00051337	48.8105	0.00463									1059	51972.1		540.9	2564.17		879.9	9669.35		405.9	2806.19	0	0
53.4072	0.0017	53.4072	0.00050202	51.0572	0.00441									1058	52336.9		540.8	2547.39		879.8	9667.13		405.8	2808.09	0	0
55.8655	0.00133	55.8655	0.00038354	53.4072	0.00629									1057	52815.8		540.7	2532.6		879.7	9691.62		405.7	2797.22	0	0
58.4368	0.00124	58.4368	0.00034967	55.8655	0.00665									1056	52881.4		540.6	2471.49		879.6	9557.67		405.6	2670.29	0	0
61.1265	0.0012	61.1265	0.00055933	58.4368	0.00579									1055	52288.6		540.5	2492.28		879.5	9717.15		405.5	2702.26	0	0
63.9401	0.00115	63.9401	0.00085332	61.1265	0.00565									1054	52357.2		540.4	2534.64		879.4	9655.38		405.4	2714.78	0	0
66.8831	0.00109	66.8831	0.00081927	63.9401	0.00543									1053	52450.9		540.3	2542.38		879.3	9575.46		405.3	2732.48	0	0
69.9616	0.00101	69.9616	0.0007792	66.8831	0.00517									1052	52457.5		540.2	2578.32		879.2	9685.26		405.2	2655.7	0	0
73.1818	0.00071703	73.1818	0.0005231	69.9616	0.00486									1051	52147.9		540.1	2544.39		879.1	9527.21		405.1	2590.98	0	0
76.5502	0.00062321	76.5502	0.00042473	73.1818	0.00336									1050	52228.8		540	2525.91		879	9475.98		405	2610.49	0	0
80.0736	0.00059305	80.0736	0.00039997	76.5502	0.00461									1049	52526.1		539.9	2543.17		878.9	9468.29		404.9	2639.47	0	0
83.7592	0.00055989	83.7592	0.000379	80.0736	0.00549									1048	52342.3		539.8	2531.82		878.8	9452.5		404.8	2591.51	0	0
87.6145	0.0005295	87.6145	0.00035947	83.7592	0.00524									1047	52595.2		539.7	2502.72		878.7	9489.89		404.7	2544.79	0	0
91.6472	0.00049564	91.6472	0.00034072	87.6145	0.00495									1046	52487.5		539.6	2506.37		878.6	9437.76		404.6	2538.17	0	0
95.8655	0.00046064	95.8655	0.00032314	91.6472	0.00465									1045	52996.4		539.5	2529.88		878.5	9369.74		404.5	2540.83	0	0
100.278	0.00041373	100.278	0.00015583	95.8655	0.00432									1044	53231		539.4	2549.21		878.4	9305.88		404.4	2541.67	0	0
104.894	0.00032972			100.278	0.00389									1043	53093.5		539.3	2583.23		878.3	9265.24		404.3	2501.59	0	0
109.722	0.00031005			104.894	0.00306									1042	53102.8		539.2	2547.55		878.2	9311.76		404.2	2467.64	0	0
114.772	0.00029545			109.722	0.0029									1041	53423		539.1	2550.85		878.1	9150.33		404.1	2387.77	0	0
120.055	0.00027685			114.772	0.00277									1040	53341.9		539	2518.66		878	9240.32		404	2373.89	0	0
125.58	0.00015178			120.055	0.00262									1039	53182		538.9	2529.38		877.9	9261.73		403.9	2366.91	0	0
131.361	0.00013576			125.58	0.00187									1038	53743.3		538.8	2514.68		877.8	9036.53		403.8	2372.97	0	0
137.407	0.00022065			131.361	0.00121									1037	53320.7		538.7	2559.21		877.7	9054.86		403.7	2345.19	0	0
143.731	0.00023373			137.407	0.00169									1036	53279.1		538.6	2578.62		877.6	9093.35		403.6	2290.18	0	0
150.347	0.00015477			143.731	0.00214									1035	53187.6		538.5	2587.8		877.5	9167.77		403.5	2295.81	0	0
157.267	0.00012366			150.347	0.00152									1034	53156.6		538.4	2515.51		877.4	9174.32		403.4	2254.94	0	0
164.506	0.0001164			157.267	0.00094291									1033	53506.1		538.3	2520.39		877.3	9131.2		403.3	2288.63	0	0
172.078	8.0092e-05			164.506	0.00088243									1032	53911.6		538.2	2547.18		877.2	9089.31		403.2	2274.43	2244.2	2245.45
179.998	0			172.078	0.00084383									1031	53736.1		538.1	2585.08		877.1	9127.34		403.1	2214.1	2240.16	2241.87
				179.998	0.00157									1030	53874.4		538	2619.2		877	9005.37		403	2188.69	2236.67	2238.98
														1029	53962.5		537.9	2574.74		876.9	9001.47		402.9	2215.2	2226.13	2229.19
														1028	54500		537.8	2565.38		876.8	9099.67		402.8	2221.82	2205.44	2209.44
														1027	54363.8		537.7	2556.32		876.7	9160.5		402.7	2234.66	2205.75	2210.9
														1026	54154.7		537.6	2530.15		876.6	9044.26		402.6	2164.51	2206.25	2212.78
														1025	54381.5		537.5	2516.27		876.5	9035.25		402.5	2219.12	2207.05	2215.21
														1024	54372.3		537.4	2497.67		876.4	9051.88		402.4	2212.29	2208.25	2218.31
														1023	53893.8		537.3	2533		876.3	9022.6		402.3	2260.88	2210.03	2222.29
														1022	54098.3		537.2	2567.14		876.2	9184.49		402.2	2191.66	2212.54	2227.36
														1021	54792.7		537.1	2531.9		876.1	9214.76		402.1	2200.61	2216.02	2233.82
														1020	54183.4		537	2499.94		876	9226.2		402	2215.93	2220.66	2242.02
														1019	53829.7		536.9	2531.71		875.9	9116.89		401.9	2288.13	2226.7	2252.43
														1018	54986		536.8	2461.96		875.8	9079.24		401.8	2289.52	2234.32	2265.58
														1017	54900.9		536.7	2506.55		875.7	8972.99		401.7	2358.21	2243.71	2282.1
														1016	55025.3		536.6	2484.38		875.6	9110.69		401.6	2389.7	2254.99	2302.77
														1015	55430.3		536.5	2523.64		875.5	9021.71		401.5	2465.35	2268.29	2328.48
														1014	55900.3		536.4	2517.58		875.4	9031.18		401.4	2424.34	2283.65	2360.16
														1013	56738.4		536.3	2524.94		875.3	9104.02		401.3	2522.97	2301.11	2398.81
														1012	56552.1		536.2	2519.95		875.2	9219.38		401.2	2589.02	2320.74	2445.4
														1011	57840		536.1	2546.36		875.1	9307.66		401.1	2695.55	2342.69	2500.85
														1010	58445		536	2573.62		875	9287.38		401	2771.11	2367.25	2565.87
														1009	57958.1		535.9	2518.32		874.9	9391.62		400.9	2886.55	2394.97	2640.95
														1008	56747.5		535.8	2533.64		874.8	9436.04		400.8	2954.9	2426.78	2726.17
														1007	55715.7		535.7	2477.94		874.7	9461.26		400.7	3072.36	2464.13	2821.13
														1006	53973.9		535.6	2479.99		874.6	9487.15		400.6	3264.72	2509.18	2924.89
														1005	54131.8		535.5	2500.62		874.5	9520.14		400.5	3381.79	2565.06	3035.86
														1004	52891.6		535.4	2477.96		874.4	9610.98		400.4	3535.99	2636.12	3151.78
														1003	54057.7		535.3	2560.86		874.3	9690.39		400.3	3749.82	2728.27	3269.78
														1002	53278.9		535.2	2559.08		874.2	9887.37		400.2	3971.71	2849.24	3386.45
														1001	53186.8		535.1	2540.14		874.1	9882.58		400.1	4259.26	3008.8	3497.97
														1000	52745.8		535	2583.51		874	10077.6		400	4549.84	3218.66	3600.29
														999	52243.5		534.9	2602.06		873.9	10257.7		399.9	4985.47	3492.21	3689.4
														998	52679		534.8	2587.42		873.8	10605.3		399.8	5497.79	3843.63	3761.55
														997	52765.1		534.7	2585.83		873.7	10788.7		399.7	5963.39	4286.46	3813.51
														996	52409.9		534.6	2539.46		873.6	11044.6		399.6	6583.55	4831.56	3842.81
														995	52433.6		534.5	2560.2		873.5	11207.6		399.5	7268.81	5484.63	3847.89
														994	52604.6		534.4	2583.91		873.4	11420.8		399.4	7976.15	6243.47	3828.26
														993	52511.1		534.3	2572.96		873.3	11575.2		399.3	8800.66	7095.44	3784.5
														992	52247.5		534.2	2600.96		873.2	11855		399.2	9578.9	8015.84	3718.22
														991	52610.1		534.1	2644.85		873.1	12193.4		399.1	10374.3	8967.55	3631.95
														990	53203.5		534	2707.92		873	12530.2		399	11194.9	9902.54	3528.96
														989	52973.6		533.9	2735.46		872.9	12877.5		398.9	12019.8	10765.4	3413.05
														988	52502.2		533.8	2730.55		872.8	13119.1		398.8	12505.9	11498.6	3288.28
														987	52728.3		533.7	2722.6		872.7	13416.8		398.7	12994	12048.8	3158.73
														986	52145.3		533.6	2736.95		872.6	13676.7		398.6	13220.6	12373.2	3028.29
														985	53136.7		533.5	2745.61		872.5	13932.6		398.5	13255	12445.6	2900.47
														984	53090.5		533.4	2738.35		872.4	14079		398.4	13008.3	12259.4	2778.22
														983	52577.6		533.3	2754.92		872.3	14268.5		398.3	12582.3	11828.9	2663.89
														982	53342		533.2	2756.07		872.2	14319.6		398.2	11781.4	11187.2	2559.19
														981	52989.7		533.1	2753.47		872.1	14396		398.1	10857.4	10381.7	2465.14
														980	52572.3		533	2785		872	14336.4		398	9966.01	9468.45	2382.21
														979	53694.4		532.9	2812.48		871.9	14219.6		397.9	8869.19	8505.01	2310.35
														978	53001.6		532.8	2851.21		871.8	13798.1		397.8	7793.18	7544.8	2249.05
														977	53896.3		532.7	2865.97		871.7	13611.8		397.7	6842.04	6632.24	2197.54
														976	54154.5		532.6	2881.23		871.6	13203.8		397.6	5920.23	5800.08	2154.87
														975	53820.8		532.5	2954.73		871.5	12910.1		397.5	5130.52	5068.49	2119.93
														974	53659.6		532.4	2913.58		871.4	12535.6		397.4	4491.32	4445.99	2091.63
														973	53289.4		532.3	2902.24		871.3	12261.3		397.3	3919.97	3931.51	2068.92
														972	53147.8		532.2	2988.33		871.2	11854.4		397.2	3494.37	3517.03	2050.82
														971	53899.6		532.1	2993.71		871.1	11515.7		397.1	3188.6	3190.26	2036.47
														970	53329.2		532	2924.2		871	11024.5		397	2981.52	2937.08	2025.13
														969	53624.7		531.9	2908.78		870.9	10634		396.9	2742.87	2743.32	2016.18
														968	53798.6		531.8	3031.42		870.8	10438.4		396.8	2606.99	2596	2009.13
														967	53666		531.7	3037.96		870.7	10087.7		396.7	2467.89	2483.96	2003.58
														966	53899.1		531.6	3002.8		870.6	9895.52		396.6	2418.12	2398.12	1999.2
														965	53847.6		531.5	2948.82		870.5	9565.36		396.5	2348.09	2331.36	1995.76
														964	53385.9		531.4	2966.19		870.4	9412.5		396.4	2266.45	2278.32	1993.05
														963	53545		531.3	3042.43		870.3	9348.6		396.3	2218.83	2235.06	1990.91
														962	54228.5		531.2	2965.79		870.2	9286.53		396.2	2195.79	2198.81	1989.23
														961	54114.8		531.1	2946.98		870.1	9248.07		396.1	2201.36	2167.66	1987.92
														960	53787.3		531	2982.72		870	9038.54		396	2163.72	2140.36	1986.89
														959	53472.4		530.9	2970.88		869.9	8962.24		395.9	2104.65	2116.1	1986.08
														958	53863.7		530.8	2876.04		869.8	8949.08		395.8	2105.73	2094.43	1985.46
														957	53808.4		530.7	2888.76		869.7	8948.39		395.7	2100.81	2075.11	1984.98
														956	53367		530.6	2881.09		869.6	8791.92		395.6	2067.62	2058.01	1984.62
														955	53275.4		530.5	2905.68		869.5	8732.71		395.5	2024.86	2043.07	1984.34
														954	53872.5		530.4	2836.61		869.4	8696.66		395.4	2054.64	2030.22	1984.13
														953	53906.7		530.3	2820.47		869.3	8608.7		395.3	2055.57	2019.4	1983.97
														952	54272.5		530.2	2856.52		869.2	8629.9		395.2	2021.15	2010.49	1983.85
														951	53969.7		530.1	2826.77		869.1	8797.22		395.1	2026.44	2003.32	1983.76
														950	54568.1		530	2752.81		869	8607.19		395	2006.38	1997.71	1983.69
														949	54666.6		529.9	2714.29		868.9	8564.87		394.9	1989.79	1993.45	1983.64
														948	54049.7		529.8	2715.69		868.8	8503.49		394.8	1985.39	1990.31	1983.62
														947	54412		529.7	2685.58		868.7	8502.85		394.7	1946.12	1988.74	1984.31
														946	54457.4		529.6	2654.01		868.6	8443		394.6	1990.33	1987.86	1984.99
														945	54576.3		529.5	2621.16		868.5	8493		394.5	2020.68	1987.48	1985.68
														944	54458.9		529.4	2640.08		868.4	8414.2		394.4	2032.24	1987.47	1986.37
														943	54634.9		529.3	2605.38		868.3	8395.4		394.3	1981.42	1987.72	1987.06
														942	55058.6		529.2	2615.46		868.2	8399.9		394.2	2007.54	1988.13	1987.75
														941	55309.4		529.1	2585.92		868.1	8333.96		394.1	2008.52	1988.66	1988.45
														940	54679		529	2542.62		868	8266.62		394	1961.61	1989.25	1989.14
														939	55121.1		528.9	2545.26		867.9	8511.96		393.9	1999.46	0	0
														938	55659.7		528.8	2585.28		867.8	8445		393.8	1968.56	0	0
														937	55319.6		528.7	2558.77		867.7	8365.72		393.7	1975.68	0	0
														936	55656.8		528.6	2533.66		867.6	8366.12		393.6	1947.57	0	0
														935	55803.2		528.5	2605.45		867.5	8283.38		393.5	1960.82	0	0
														934	55604.6		528.4	2604.93		867.4	8168.06		393.4	1997.95	0	0
														933	55301.6		528.3	2590.17		867.3	8249.39		393.3	1972.67	0	0
														932	55741.2		528.2	2571.91		867.2	8126.79		393.2	2004.29	0	0
														931	55851.2		528.1	2561.31		867.1	8270.54		393.1	1990.37	0	0
														930	55454.9		528	2495.42		867	8239.07		393	1925.16	0	0
														929	55178.8		527.9	2539.18		866.9	8189.43		392.9	1979.2	0	0
														928	55523.7		527.8	2577.97		866.8	8112.85		392.8	2027.92	0	0
														927	55589.4		527.7	2547.01		866.7	8078.21		392.7	2032.16	0	0
														926	56518.9		527.6	2542.57		866.6	8086.98		392.6	1978.59	0	0
														925	55678.7		527.5	2569.77		866.5	8177.54		392.5	1957.62	0	0
														924	56327.3		527.4	2541.58		866.4	8175.27		392.4	1957.51	0	0
														923	56758.4		527.3	2575.32		866.3	8125.69		392.3	1975.28	0	0
														922	56380		527.2	2570.14		866.2	8077.88		392.2	1982.14	0	0
														921	55766.4		527.1	2520.15		866.1	8079.33		392.1	1987.15	0	0
														920	56384.2		527	2507.85		866	8066.64		392	2004.09	0	0
														919	56348.9		526.9	2524.82		865.9	8135.57
														918	56701.4		526.8	2577.59		865.8	8107.47
														917	56890.4		526.7	2576.48		865.7	8116.77
														916	56962.1		526.6	2479.18		865.6	8080.48
														915	56993.9		526.5	2496.6		865.5	8048.92
														914	57212.6		526.4	2561.57		865.4	8118.88
														913	56711.3		526.3	2554.17		865.3	8080.92
														912	56716		526.2	2583.01		865.2	8108.57
														911	56741.5		526.1	2528.62		865.1	8219.19
														910	56817.6		526	2523.84		865	8305.23
														909	57776.4		525.9	2564.81		864.9	8339.64
														908	56946.4		525.8	2532.49		864.8	8305.8
														907	58468.8		525.7	2570.41		864.7	8327.87
														906	57942.7		525.6	2509.77		864.6	8308.64
														905	57800.8		525.5	2548.38		864.5	8415.69
														904	57808.6		525.4	2602.68		864.4	8350.95
														903	58779.8		525.3	2536.12		864.3	8443.71
														902	58091.7		525.2	2469.29		864.2	8495.29
														901	58529.3		525.1	2517.18		864.1	8571.08
														900	58103.5		525	2544.86		864	8589.18
														899	58528.6					863.9	8666.08
														898	58619.6					863.8	8606.98
														897	58947.4					863.7	8672.41
														896	59515.7					863.6	8717.84
														895	58472					863.5	8754.13
														894	58141.2					863.4	8785.25
														893	58549.8					863.3	8823.21
														892	58474.5					863.2	8946.66
														891	58190.8					863.1	8969.08
														890	58373					863	9025.23
														889	57873.8					862.9	8927.35
														888	57775.1					862.8	9034.91
														887	58512.7					862.7	9041.12
														886	59124.7					862.6	9008.41
														885	58842.1					862.5	8874.57
														884	58665.9					862.4	8893.14
														883	59388.8					862.3	8896.66
														882	60192.4					862.2	8827.79
														881	60177.7					862.1	8649.43
														880	60635.5					862	8631.22
														879	59409					861.9	8665.87
														878	58447.7					861.8	8495.12
														877	58632.6					861.7	8431.37
														876	58902.4					861.6	8322.28
														875	61286.9					861.5	8233
														874	68164.7					861.4	8255.17
														873	75897.3					861.3	8189.27
														872	77339.7					861.2	8020.46
														871	72075.2					861.1	7938.06
														870	62360.9					861	7969.15
														869	55367.4					860.9	7917.96
														868	52888.5					860.8	7902.79
														867	52455.8					860.7	7790.03
														866	51853.7					860.6	7771.06
														865	53243.9					860.5	7770.32
														864	54509.8					860.4	7684.86
														863	55014.9					860.3	7650.25
														862	54029.6					860.2	7556.34
														861	51386.7					860.1	7560.53
														860	48384.9					860	7418.22
														859	48035.9					859.9	7360.16
														858	50899.8					859.8	7416.32
														857	62969.5					859.7	7287.68
														856	85751.5					859.6	7224.92
														855	99734.8					859.5	7188.7
														854	88649.1					859.4	7203.49
														853	64273.8					859.3	7148.59
														852	48235.5					859.2	7159.69
														851	43021.5					859.1	7077.78
														850	41279.4					859	7081.46
														849	40763.7					858.9	7140.86
														848	40748.1					858.8	7109.32
														847	40767					858.7	7156.89
														846	40366.8					858.6	7257.36
														845	40401.3					858.5	7214.51
														844	40259.8					858.4	7257.6
														843	40095.7					858.3	7287.97
														842	39752.3					858.2	7315.34
														841	41047.4					858.1	7350.97
														840	40491.6					858	7477.62
														839	40420.7					857.9	7481.36
														838	40519.7					857.8	7469.74
														837	41317.2					857.7	7472.72
														836	40887.6					857.6	7568.24
														835	40644.6					857.5	7804.62
														834	41067					857.4	7894.07
														833	40862					857.3	7826.97
														832	40966.4					857.2	8052.45
														831	41679.4					857.1	8293.58
														830	41749.2					857	8558.22
														829	41438.8					856.9	8732.16
														828	41464.3					856.8	9082.24
														827	40557.7					856.7	9598.09
														826	40596.2					856.6	9992.28
														825	40918.6					856.5	10245.2
														824	40737.6					856.4	10799.1
														823	40430.3					856.3	11427.4
														822	41216.1					856.2	12046.3
														821	40404.9					856.1	12688.2
														820	40801					856	13546.7
														819	41566.7					855.9	14127.8
														818	41722.3					855.8	14890.8
														817	42202.9					855.7	15826.3
														816	41605.4					855.6	16907.5
														815	41661.3					855.5	17958.8
														814	41869.4					855.4	18720.8
														813	40718.4					855.3	19587.9
														812	41203.6					855.2	20325.7
														811	40157.3					855.1	20830.9
														810	40699.8					855	21316.5
														809	41387.9					854.9	21516.9
														808	41270.2					854.8	21571.3
														807	41158.8					854.7	21233
														806	40764.4					854.6	20444
														805	40737.7					854.5	19703.4
														804	40809.3					854.4	18981
														803	40393					854.3	17824.3
														802	41106.1					854.2	16726.8
														801	40830.7					854.1	15614.8
														800	40704.1					854	14187.7
														799	40696.8					853.9	13115.4
														798	41053.5					853.8	12272.2
														797	41080					853.7	11419.8
														796	41536.7					853.6	10629.9
														795	41160.8					853.5	9882.5
														794	41888.9					853.4	9341.58
														793	40663.8					853.3	8809.28
														792	41258.6					853.2	8356.94
														791	42170.1					853.1	8054.55
														790	41715.6					853	7900.87
														789	41226.3					852.9	7704.41
														788	42267.1					852.8	7574.24
														787	42104.7					852.7	7370.01
														786	42575.1					852.6	7210.06
														785	43180.2					852.5	7198.72
														784	43630.2					852.4	7236.45
														783	42921.4					852.3	7112.19
														782	43138.7					852.2	6882.77
														781	42837.1					852.1	6743.86
														780	42416.6					852	6894.69
														779	42743.1					851.9	6878.2
														778	42933.2					851.8	6764.93
														777	42397.7					851.7	6751.58
														776	41996.1					851.6	6705.55
														775	40930.7					851.5	6646.28
														774	40957.6					851.4	6594.41
														773	39685.6					851.3	6545.23
														772	39164.9					851.2	6590.2
														771	38681.3					851.1	6434.18
														770	37657.9					851	6484.14
														769	38262.9					850.9	6527.46
														768	37781.2					850.8	6583.93
														767	36932.2					850.7	6533.53
														766	36451.9					850.6	6425.9
														765	36388.4					850.5	6469.86
														764	36174.5					850.4	6344.25
														763	36004.4					850.3	6422.96
														762	36852.6					850.2	6382.94
														761	36267.9					850.1	6343.87
														760	36144.1					850	6452.02
														759	35965.6					849.9	6450.4
														758	36278.8					849.8	6340.04
														757	36384.2					849.7	6336.28
														756	35657.9					849.6	6406.23
														755	35402.1					849.5	6384.38
														754	35815.2					849.4	6463.5
														753	34944.7					849.3	6358.8
														752	35701					849.2	6314.85
														751	34960.6					849.1	6396.27
														750	34880					849	6338.28
														749	35105.4					848.9	6466.98
														748	34693.3					848.8	6312.28
														747	34855.5					848.7	6259.8
														746	35141					848.6	6191.26
														745	34705.4					848.5	6297.9
														744	34872.7					848.4	6411.63
														743	35101.5					848.3	6291.91
														742	35018.8					848.2	6290.74
														741	35426.3					848.1	6195.53
														740	35097.5					848	6360.28
														739	35006					847.9	6403.49
														738	35026.6					847.8	6402.05
														737	35388.9					847.7	6358.5
														736	35426.1					847.6	6334.11
														735	35361.2					847.5	6411.13
														734	35191.3					847.4	6337.95
														733	35061					847.3	6454.1
														732	35043.7					847.2	6371.02
														731	34932.5					847.1	6382.08
														730	35081.8					847	6259.59
														729	35217.5					846.9	6366.01
														728	35531.6					846.8	6349.18
														727	35659.5					846.7	6277.83
														726	36010.3					846.6	6303.65
														725	35828.1					846.5	6235.71
														724	35987.7					846.4	6301.6
														723	36718.5					846.3	6245.01
														722	36815.8					846.2	6374.27
														721	37088.8					846.1	6256.16
														720	37696.5					846	6236.15
														719	37827.8					845.9	6208.78
														718	39109.1					845.8	6219.56
														717	39169.4					845.7	6317.54
														716	40047.3					845.6	6234.27
														715	38950.5					845.5	6318.04
														714	38824.2					845.4	6296.42
														713	37784.3					845.3	6291.24
														712	37417.1					845.2	6314.66
														711	37179.1					845.1	6279.12
														710	36774					845	6375.91
														709	36670.5					844.9	6316.96
														708	35787.9					844.8	6316.5
														707	34171.7					844.7	6315.22
														706	33215					844.6	6284.21
														705	32315.9					844.5	6280.92
														704	31672.7					844.4	6318.7
														703	31400.5					844.3	6366.28
														702	30695.7					844.2	6378.09
														701	29742.9					844.1	6382.19
														700	29621.1					844	6337.21
														699	29556.5
														698	29139.5
														697	28825.7
														696	29128.2
														695	28930.3
														694	28970.5
														693	28154.9
														692	28476.9
														691	28199
														690	27850.8
														689	27507.8
														688	27444.3
														687	27466
														686	27630.3
														685	27473.5
														684	27403.3
														683	27282.5
														682	27654.4
														681	27316.3
														680	26862.7
														679	27534.5
														678	27551.1
														677	27810
														676	28222.5
														675	28176.7
														674	27927.1
														673	27768.7
														672	27949.9
														671	28606.4
														670	28043
														669	27909.7
														668	28299.2
														667	28534.4
														666	28058.6
														665	28249.5
														664	28638.3
														663	27916.2
														662	27450.3
														661	27124.8
														660	27569.1
														659	27459.5
														658	28128.8
														657	27868
														656	27536.8
														655	27931.7
														654	28458.7
														653	29005.7
														652	29595.1
														651	30161.1
														650	30959.7
														649	32368
														648	33689.1
														647	35440.1
														646	36715.4
														645	37892.9
														644	38041.1
														643	36223.6
														642	33441.8
														641	29620.2
														640	28003.9
														639	25851.5
														638	24530.4
														637	23708
														636	22938.3
														635	22199.3
														634	21546.8
														633	21486.4
														632	21438
														631	21744.8
														630	22206.8
														629	22301.5
														628	21915.4
														627	22228.5
														626	21765.4
														625	21492.3
														624	20851.1
														623	20031.8
														622	19706.9
														621	19776.3
														620	19207.9
														619	19382.3
														618	19185.4
														617	19306.7
														616	18995.2
														615	19276.7
														614	18924
														613	19182.7
														612	18525
														611	18694.6
														610	18614.2
														609	19029.1
														608	18885.2
														607	18526.3
														606	18654.4
														605	18891.5
														604	18678.7
														603	18738.9
														602	19277.4
														601	18885.9
														600	19249.9
														599	19599.4
														598	18588.7
														597	18450
														596	19325.5
														595	18809.9
														594	19034
														593	19508
														592	19342.6
														591	19067.9
														590	19040.6
														589	18906.7
														588	18998.7
														587	18837.5
														586	19145.8
														585	19175.5
														584	19454.3
														583	19376.6
														582	18973.5
														581	19203.1
														580	18980.5
														579	18973.1
														578	18988.3
														577	19290.6
														576	19268.8
														575	18888
														574	18937.7
														573	19009
														572	19597.1
														571	19622.8
														570	19448.6
														569	19155.4
														568	19486.8
														567	19403.6
														566	20019.8
														565	19346.3
														564	19258
														563	19722.4
														562	19605.5
														561	19631.4
														560	19678.9
														559	19459
														558	19929.7
														557	19763.6
														556	19851.3
														555	20017.2
														554	19755.6
														553	19794.6
														552	19754
														551	19775.1
														550	19989.6
														549	20286.6
														548	19766.5
														547	20230.4
														546	19790.3
														545	19828.8
														544	19793.7
														543	19792.7
														542	19660.4
														541	19769.9
														540	19248.7
														539	19612.1
														538	19929.8
														537	19901
														536	19737.9
														535	19855.9
														534	21074.8
														533	21504.4
														532	21572.9
														531	21791
														530	20968.4
														529	19848
														528	19513.1
														527	19785.3
														526	19686.7
														525	19568.7
														524	19758.8
														523	19742.9
														522	20031.9
														521	19688.3
														520	20138.4
														519	19816.7
														518	19756
														517	19767.6
														516	19810.3
														515	19873.6
														514	19646.9
														513	20204.5
														512	20153.9
														511	20022
														510	20625.1
														509	20206.3
														508	20457.4
														507	20776
														506	20313.2
														505	20270
														504	20698.7
														503	20003
														502	20363.1
														501	20421.7
														500	20059.3
														499	20181.9
														498	20249
														497	20372.5
														496	20261.3
														495	20491.4
														494	20278.7
														493	20423.4
														492	20145.8
														491	20258.8
														490	20805.9
														489	20667.5
														488	20689.6
														487	20668.9
														486	20056.7
														485	20824.9
														484	20919.3
														483	20382.7
														482	20721.7
														481	20603.6
														480	20452.2
														479	20939.1
														478	20771.9
														477	20993
														476	21062.9
														475	21291.1
														474	20828.7
														473	20866.5
														472	20943.8
														471	20795
														470	20664.5
														469	20689.9
														468	20661
														467	21090.7
														466	21108.5
														465	20856.6
														464	20749.5
														463	21179.9
														462	21091.4
														461	21237.4
														460	20982.7
														459	21115
														458	20981.6
														457	20887
														456	21688.8
														455	21239.7
														454	20816.8
														453	21241.1
														452	21016.4
														451	21481.6
														450	21241.4
														449	21369.8
														448	21089
														447	21158.4
														446	21258.8
														445	21549.3
														444	21574.5
														443	21245.1
														442	21759.6
														441	21233.3
														440	21698.9
														439	21313.7
														438	21404.1
														437	21577.4
														436	21314.8
														435	21538.8
														434	20985.5
														433	20975.3
														432	21475.1
														431	21907.3
														430	21392.1
														429	21834.9
														428	21375.5
														427	22152.4
														426	21841.2
														425	21821.2
														424	22093.3
														423	21887.7
														422	22153.4
														421	21707.7
														420	21370.7
														419	21422.1
														418	21379.9
														417	21031.2
														416	20819.8
														415	20674.7
														414	20577
														413	19858.5
														412	19454.8
														411	19421.5
														410	19022.1
														409	19175.4
														408	19225.8
														407	19878.7
														406	19075.5
														405	18206.2
														404	17645.9
														403	16944.2
														402	18343.7
														401	26295.6
														400	43284.5
														399	57347.9
														398	52975.6
														397	33869
														396	19870.3
														395	15697.4
														394	14639.1
														393	14429.1
														392	14095.1
														391	14031.2
														390	13958.9
														389	14105.5
														388	13980.1
														387	14013
														386	14125.7
														385	14206.4
														384	13964.7
														383	14256.1
														382	14433.2
														381	14264.6
														380	14132
														379	14105.2
														378	14038.7
														377	14697.5
														376	14429.8
														375	14593.1
														374	14435.2
														373	14736.2
														372	14298.4
														371	14605.6
														370	14494
														369	14407.7
														368	14375.6
														367	14401.9
														366	14520.8
														365	14443.7
														364	14496.7
														363	14521.9
														362	14625.6
														361	14497.4
														360	14587.9
														359	14228.5
														358	14660.3
														357	14862.5
														356	14523.1
														355	14530.8
														354	14786.3
														353	14333.8
														352	14711.7
														351	14910.2
														350	14689.3
														349	14798.5
														348	14930
														347	15051.4
														346	15095.3
														345	15289.5
														344	15233.4
														343	14733.4
														342	14970.5
														341	15361.2
														340	15031.7
														339	15016
														338	15289.2
														337	15225
														336	15023.6
														335	15362.7
														334	15156.9
														333	15256.7
														332	15496.6
														331	15359.1
														330	15292.6
														329	15365.1
														328	15225.3
														327	15353.8
														326	15735.4
														325	15364.6
														324	14959.6
														323	15082.8
														322	15216
														321	15193.7
														320	15275.8
														319	15415
														318	15751.8
														317	15666
														316	15552.6
														315	15475.5
														314	15529.7
														313	16103.8
														312	15810.2
														311	16454.3
														310	16270.1
														309	16121.3
														308	15937.2
														307	16121.6
														306	15626.7
														305	15759.5
														304	15076.5
														303	14801.3
														302	14200.2
														301	13245.4
														300	12704.3
														299	12554
														298	11691.2
														297	11345.6
														296	10835.3
														295	10850.3
														294	11325.3
														293	12191.4
														292	13258.7
														291	12751.9
														290	11363.2
														289	10183.6
														288	12703.4
														287	24654.1
														286	24654.1
														285	24654.1
														284	24654.1
														283	28879.6
														282	12738.8
														281	6995.51
														280	5996.49
														279	5541.72
														278	5274.67
														277	5284.24
														276	5378.29
														275	5379.02
														274	4994.62
														273	5176.14
														272	5157.96
														271	5157.96
														270	5157.96
														269	5157.96
														268	5157.96
														267	5157.96
														266	5157.96
														265	5212.71
														264	4797.95
														263	4905.2
														262	5008.58
														261	4957.08
														260	4963.32
														259	5084.67
														258	4984.51
														257	5045.08
														256	5070.47
														255	4806.87
														254	5088.24
														253	5155.94
														252	5030.31
														251	4878.41
														250	5027.96
														249	5128.8
														248	4811.72
														247	5162.31
														246	5155.74
														245	5036.24
														244	5002.33
														243	4989.5
														242	4997.17
														241	4718.78
														240	4944.7
														239	5235.98
														238	5065.81
														237	5119.76
														236	5050.53
														235	5135.51
														234	5274.55
														233	4980.22
														232	5040.2
														231	5056.18
														230	5077.37
														229	5290.69
														228	5329.72
														227	5089.28
														226	5157.99
														225	5080.82
														224	5147.65
														223	5107.79
														222	5150.42
														221	4944.21
														220	5078.91
														219	5175.15
														218	5229.72
														217	5246.41
														216	5106.6
														215	5069.71
														214	5015.99
														213	5083.47
														212	5020.67
														211	4921.33
														210	5170.3
														209	4983.64
														208	5058.41
														207	5032.47
														206	5079.94
														205	5031.92
														204	5156.31
														203	5048.65
														202	5048.65
														201	5048.65
														200	5048.65
														199	5048.65
														198	5048.65
														197	5048.65
														196	5048.65
														195	5138.06
														194	5044.49
														193	4782.23
														192	4716.42
														191	4962.73
														190	4601.62
														189	4742.79
														188	5065.59
														187	4992.04
														186	4882.86
														185	4877.33
														184	5058.92
														183	4937.94
														182	4921.26
														181	5002.54
														180	4981.09
														179	4917.63
														178	5198.1
														177	4990.22
														176	4870.62
														175	4909.98
														174	5004.03
														173	5096.15
														172	5082.67
														171	5024.43
														170	5025.48
														169	5259.92
														168	5191.26
														167	5025.6
														166	5035.41
														165	5298.38
														164	5172.25
														163	5159.65
														162	5017.92
														161	4970.74
														160	4963.9
														159	5010.51
														158	5184.96
														157	4986.09
														156	5270.28
														155	5286.78
														154	5292.85
														153	5126.29
														152	5044.11
														151	4927.67
														150	5108.24
														149	5160.83
														148	5255.11
														147	5277.89
														146	5155.39
														145	5098.54
														144	5242.06
														143	5188.93
														142	5213.87
														141	5294.97
														140	5479.84
														139	5368.01
														138	5370.69
														137	5277.46
														136	5341.75
														135	5378.38
														134	5404.66
														133	5264.89
														132	5176.13
														131	5228.24
														130	5313.91
														129	5319.36
														128	5201.34
														127	5194.07
														126	5208.61
														125	5196.35
														124	5329.44
														123	5364.47
														122	5440.18
														121	5308.08
														120	5422.47
														119	5597.2
														118	5229.15
														117	5030.91
														116	5704.79
														115	6603.84
														114	7448.3
														113	8110.19
														112	8126.39
														111	7185.03
														110	6025.2
														109	5286.31
														108	4813.66
														107	4747.59
														106	4658.56
														105	4559.24
														104	4562.84
														103	4594.8
														102	4670.93
														101	4755.51
														100	4686.95
														99	4787.58
														98	4682.17
														97	4598.56
														96	4686.79
														95	4654.88
														94	4670.6
														93	4585.01
														92	4480.71
														91	4588.77
														90	4713.97
														89	4573.99
														88	4660.31
														87	4622.81
														86	4492.82
														85	4321.68
														84	4526.6
														83	4505.81
														82	4565.42
														81	4517.45
														80	4656.38
														79	4447.7
														78	4353.01
														77	4203.16
														76	4219.31
														75	4023.21
														74	4078.77
														73	4364.88
														72	5013.38
														71	6401.43
														70	8670.34
														69	10499.1
														68	10448.6
														67	8638.25
														66	5999.1
														65	3701.93
														64	2848.22
														63	2363.52
														62	2062.08
														61	1809.44
														60	1890.49
														59	1807.98
														58	1762.52
														57	1600.52
														56	1676.16
														55	1633.2
														54	1691.1
														53	1549.57
														52	1698.21
														51	1752.94
														50	1595.05
														49	1609.15
														48	1626.58
														47	1635.69
														46	1692.59
														45	1723.48
														44	1746.39
														43	1660.5
														42	1743
														41	1688.1
														40	1613.67
														39	1633.71
														38	1423.8
														37	1683.24
														36	1692.38
														35	1625.56
														34	1761.49
														33	1545.06
														32	1572.1
														31	1698.74
														30	1607.63
														29	1640.05
														28	1693.29
														27	1792.2
														26	1797.69
														25	1895.61
														24	2085.65
														23	2057.41
														22	2135.63
														21	1931.95
														20	2021.71
														19	1963.75
														18	1969.2
														17	1931.41
														16	1993.56
														15	1779.43
														14	1722.37
														13	1501.11
														12	1690.21
														11	1593.74
														10	1307.37
														9	1253.81
														8	1135.28
														7	1275.86
														6	1597.67
														5	2002.65
														4	2828.14
														3	3393.6
														2	3039.87
														1	1644.16
														0	536.738

## Sheet: Figure 4
g)										b)										c)										d)									e)										f)
NiNC-600C			NiNC-800C			NiNC-1000C				NiNC-600C			NiNC-800C			NiNC-1000C				NiNC-600C			NiNC-800C			NiNC-1000C				NiNC-600C			NiNC-800C			NiNC-1000C			NiNC-600C			NiNC-800C			NiNC-1000C				NiNC-600C
j	Potential	Error	j	Potential	Error	j	Potential	Error		j	FE	Error	j	FE	Error	j	FE	Error		j	CCC	Error	j	CCC	Error	j	CCC	Error		j	N2 GC		j	N2 GC		j	N2 GC		j	SP	Error	j	SP	Error	j	SP	Error		j
mA cm-2	V	V	mA cm-2	V	V	mA cm-2	V	V		mA cm-2	%	%	mA cm-2	%	%	mA cm-2	%	%		mA cm-2			mA cm-2			mA cm-2				mA cm-2	vol%		mA cm-2	vol%		mA cm-2	vol%		mA cm-2	%	%	mA cm-2	%	%	mA cm-2	%	%		mA cm-2
										0	--		0	--		0	--			0	--		0	--		0	--			0	22.1163		0	22.5953		0	19.4489		0	--		0	--		0	--			0
50	2.77144	0.00544	50	2.81504	0.01179	50	2.80283	0.01302		50	97.715	0.13021	50	97.3419	0.35535	50	97.3592	1.52039		50	-0.16588	0.01274	50	-0.16668	0.26976	50	-0.21641	8.94658e-05		50	21.8528		50	22.0137		50	19.1291		50	8.61183	0.20028	50	8.5115	0.08886	50	8.70074	0.14692		50
100	3.0594	0.000304056	100	3.13428	0.03072	100	3.07876	0.02188		100	98.4185	0.45299	100	96.8337	1.08048	100	96.5221	2.25998		100	-0.14859	0.15985	100	-0.11152	0.19169	100	-0.11995	0.01466		100	21.3201		100	21.7478		100	19.1002		100	17.2215	0.05956	100	17.1432	0.35715	100	17.0678	0.35995		100
150	3.32383	0.01422	150	3.36919	0.01108	150	3.33877	0.02031		150	98.3082	0.70002	150	95.6518	1.62608	150	95.3739	2.87706		150	-0.05915	0.20476	150	-0.08988	0.17234	150	-0.06189	0.00181		150	21.1847		150	21.4195		150	19.0877		150	25.443	0.55766	150	25.4792	0.4978	150	25.154	0.75424		150
200	3.58676	0.01655	200	3.69996	0.06	200	3.59138	0.02051		200	97.738	1.26382	200	89.1281	2.79603	200	94.5286	2.91922		200	-0.10537	0.10106	200	-0.03578	0.23231	200	-0.03187	0.02284		200	21.0271		200	20.9267		200	19.0071		200	34.3236	0.15165	200	32.421	0.07746	200	33.0974	1.21116		200
300	4.17655	0.05187	300	4.34372	0.06306	300	4.11066	0.01807		300	90.9846	9.80327	300	68.3174	5.28403	300	92.6425	2.86403		300	-0.05536	0.12644	300	0.1162	0.33657	300	-0.02007	0.00874		300	20.7235		300	19.5358		300	18.815		300	47.357	5.18422	300	31.5003	6.83351	300	48.6783	1.52895		300
400	4.95614	0.09323	400	5.2164	0.09885	400	4.83661	0.01297		400	84.3543	10.6644	400	66.9463	5.08017	400	89.6753	2.38628		400	-0.05295	0.12924	400	0.0728	0.4153	400	0.00288	0.000661419		400	19.7269		400	18.3604		400	18.5829		400	57.4642	8.40866	400	34.7713	8.49357	400	62.0159	1.32723		400
500	7.76233		500	--		500	6.50547	0.22499		500	66.1501		500	--		500	82.672	0.38256		500	-0.14224		500	--		500	0.03469	0.00189		500			500			500	17.7963		500	40.7716		500	--		500	69.2768	0.57667		500
	--			--			--
	--			--			--
	--			--			--
	--			--			--
	--			--			--
	--			--			--
	--			--			--
	--			--			--
	--			--			--
	--			--			--
	--			--			--
	--			--			--
	--			--			--
	--			--			--
	--			--			--
	--			--			--
	--			--			--
	--			--			--
	--			--			--
																															--			--			--
																															--			--			--
																															--			--			--
[truncated: 8 more columns]

## Sheet: Figure 5
a)					b)				d)					e)
Time	Potential	Time	FE CO		Time	N2 Bleed GC	FE H2		Time	Potential	Time	FE CO		Time	N2 Bleed GC	FE H2
h	V	h	%		h	vol%	%		h	V	h	%		h	vol%	%
0.02421	-0.37782	0	--		0	17	-		0.02494	-0.15076	0	--		0	17	--
0.02449	-0.36929	0.25	94.3971		0.25	17.3565	3.56527		0.02521	-0.15082	0.25	99.067		0.25	22.2676	6.85977
0.02476	-0.36326	0.5	94.3257		0.5	17.4331	3.23999		0.02549	-0.1508	0.5	99.5537		0.5	21.9632	6.81436
0.02504	-0.35845	0.75	94.6301		0.75	17.3838	3.17948		0.02577	-0.1507	0.75	99.8088		0.75	21.6236	6.78454
0.02532	-0.35477	1	94.9211		1	17.3216	3.16446		0.02605	-0.15053	1	105.844		1	25.2191	20.5687
0.0256	-0.35198	1.25	95.0973		1.25	17.2766	3.17135		0.02633	-0.15046	1.25	98.2512		1.25	23.5542	10.1946
0.02587	-0.34956	1.5	95.0137		1.5	17.2991	3.18749		0.0266	-0.15034	1.5	95.8082		1.5	23.3348	10.2271
0.02615	-0.3475	1.75	94.6707		1.75	17.3184	3.20155		0.02688	-0.15006	1.75	96.2273		1.75	22.9002	10.4096
0.02643	-0.34568	2	94.7308		2	17.287	3.25917		0.02716	-0.14992	2	92.4488		2	20.4118	10.1938
0.02671	-0.34437	2.25	95.0235		2.25	17.2412	3.30206		0.02744	-0.14981	2.25	92.9035		2.25	19.8947	10.264
0.02699	-0.34313	2.5	94.9721		2.5	17.2493	3.33202		0.02771	-0.14952	2.5	93.2427		2.5	19.7768	10.3741
0.02726	-0.34191	2.75	94.7445		2.75	17.2793	3.38977		0.02799	-0.14946	2.75	93.1076		2.75	19.6837	10.436
0.02754	-0.34095	3	95.0628		3	17.1855	3.42314		0.02827	-0.14925	3	92.2607		3	19.7913	10.3512
0.02782	-0.33996	3.25	94.5802		3.25	17.2949	3.43831		0.02855	-0.1491	3.25	92.7588		3.25	19.6658	10.437
0.0281	-0.33914	3.5	94.4518		3.5	17.245	3.42678		0.02883	-0.14891	3.5	92.883		3.5	19.6059	10.4348
0.02837	-0.33841	3.75	94.8355		3.75	17.1955	3.45418		0.0291	-0.14857	3.75	92.3798		3.75	19.6722	10.4019
0.02865	-0.33769	4	94.6228		4	17.2345	3.49384		0.02938	-0.14859	4	92.8567		4	19.5646	10.4753
0.02893	-0.33693	4.25	95.0775		4.25	17.1568	3.50289		0.02966	-0.1483	4.25	92.5898		4.25	19.5876	10.4676
0.02921	-0.33626	4.5	95.3648		4.5	17.1059	3.54783		0.02994	-0.14817	4.5	92.402		4.5	19.6043	10.414
0.02949	-0.33572	4.75	94.6708		4.75	17.2235	3.55426		0.03021	-0.14809	4.75	92.8827		4.75	19.5058	10.4638
0.02976	-0.33492	5	94.7747		5	17.182	3.54898		0.03049	-0.14779	5	92.758		5	19.507	10.4007
0.03004	-0.33425	5.25	95.2045		5.25	17.1302	3.58846		0.03077	-0.14779	5.25	92.6963		5.25	19.5118	10.4252
0.03032	-0.3337	5.5	95.0427		5.5	17.1399	3.5989		0.03105	-0.1474	5.5	92.7238		5.5	19.4808	10.4032
0.0306	-0.33307	5.75	94.9192		5.75	17.1558	3.61348		0.03133	-0.14723	5.75	92.8537		5.75	19.478	10.3981
0.03087	-0.33263	6	94.9741		6	17.123	3.63484		0.0316	-0.14698	6	92.6215		6	19.4829	10.3828
0.03115	-0.33195	6.25	94.9338		6.25	17.1335	3.6086		0.03188	-0.14695	6.25	92.4921		6.25	19.5023	10.3714
0.03143	-0.33145	6.5	94.8251		6.5	17.1664	3.60216		0.03216	-0.14689	6.5	92.4238		6.5	19.5047	10.3516
0.03171	-0.33084	6.75	94.6564		6.75	17.1827	3.62025		0.03244	-0.14662	6.75	92.7028		6.75	19.4423	10.3618
0.03199	-0.3304	7	93.9409		7	17.2582	3.61037		0.03271	-0.14651	7	92.2967		7	19.5297	10.3221
0.03226	-0.33	7.25	94.8173		7.25	17.1319	3.6492		0.03299	-0.14624	7.25	92.1986		7.25	19.5313	10.2752
0.03254	-0.32933	7.5	95.1354		7.5	17.0916	3.66842		0.03327	-0.14613	7.5	93.1556		7.5	19.3784	10.3335
0.03282	-0.32891	7.75	94.762		7.75	17.1423	3.67071		0.03355	-0.14599	7.75	91.7417		7.75	19.5709	10.2297
0.0331	-0.32845	8	94.4869		8	17.1773	3.65049		0.03383	-0.14582	8	90.9811		8	19.7469	10.1387
0.03337	-0.32792	8.25	94.3918		8.25	17.2152	3.68602		0.0341	-0.14569	8.25	93.0282		8.25	19.401	10.2476
0.03365	-0.32746	8.5	94.5633		8.5	17.1572	3.6818		0.03438	-0.14563	8.5	92.4257		8.5	19.5472	10.0433
0.03393	-0.32693	8.75	94.4936		8.75	17.1771	3.66746		0.03466	-0.14527	8.75	93.2172		8.75	19.505	10.0403
0.03421	-0.32643	9	94.6188		9	17.1641	3.67042		0.03494	-0.14534	9	94.8379		9	19.2791	10.1414
0.03449	-0.32595	9.25	94.4348		9.25	17.1928	3.65208		0.03521	-0.14504	9.25	93.6668		9.25	19.4982	9.96021
0.03476	-0.3255	9.5	94.6191		9.5	17.1603	3.68229		0.03549	-0.14502	9.5	93.4384		9.5	19.5695	9.86577
0.03504	-0.32502	9.75	95.6683		9.75	17.0303	3.69031		0.03577	-0.14475	9.75	94.9234		9.75	19.3269	9.97355
0.03532	-0.3245	10	94.6706		10	17.2324	3.62062		0.03605	-0.14477	10	93.6454		10	19.545	9.82544
0.0356	-0.32422	10.25	94.8653		10.25	17.2307	3.6303		0.03633	-0.1445	10.25	93.5999		10.25	19.5541	9.78732
0.03587	-0.32382	10.5	95.7908		10.5	17.1184	3.66067		0.0366	-0.14433	10.5	94.7267		10.5	19.387	9.85273
0.03615	-0.3234	10.75	95.2511		10.75	17.143	3.62868		0.03688	-0.14424	10.75	94.7982		10.75	19.3808	9.84076
0.03643	-0.32286	11	19.5811		11	51.6794	0.74532		0.03716	-0.14408	11	94.5806		11	19.4129	9.81225
0.03671	-0.32248	11.25	0.45738		11.25	97.5224	0.02063		0.03744	-0.14389	11.25	94.9324		11.25	19.364	9.79097
0.03699	-0.32191	11.5	0.2539		11.5	98.4876	0.01251		0.03771	-0.14382	11.5	95.1313		11.5	19.3347	9.79217
0.03726	-0.32157	11.75	0.11696		11.75	99.1538	0.00795		0.03799	-0.14353	11.75	95.037		11.75	19.338	9.77702
0.03754	-0.32111	12	0.06125		12	99.3607	0.00615		0.03827	-0.14344	12	94.0108		12	19.5095	9.6607
0.03782	-0.32073	12.25	0.04162		12.25	99.4802	0.00619		0.03855	-0.14338	12.25	95.0207		12.25	19.3549	9.75442
0.0381	-0.32014	12.5	0.03867		12.5	99.5153	0.00714		0.03883	-0.14315	12.5	95.0489		12.5	19.3376	9.72655
0.03837	-0.31977	12.75	0.03675		12.75	99.5073	0.00816		0.0391	-0.14307	12.75	95.0176		12.75	19.3415	9.72811
0.03865	-0.31943	13	0.03844		13	99.4994	0.00952		0.03938	-0.14279	13	94.994		13	19.3448	9.71365
0.03893	-0.31903	13.25	0.03725		13.25	99.5413	0.01054		0.03966	-0.14271	13.25	95.0478		13.25	19.3309	9.72616
0.03921	-0.3187	13.5	0.03203		13.5	99.5819	0.01105		0.03994	-0.1426	13.5	94.7876		13.5	19.3588	9.6777
0.03949	-0.31807	13.75	0.02336		13.75	99.6494	0.0107		0.04021	-0.14244	13.75	95.7009		13.75	19.2173	9.74346
0.03976	-0.31785	14	0.02142		14	99.624	0.01173		0.04049	-0.14233	14	95.2107		14	19.2972	9.69301
0.04004	-0.31731	14.25	0.02162		14.25	99.5452	0.01273		0.04077	-0.14221	14.25	95.0283		14.25	19.3287	9.65274
0.04032	-0.31699	14.5	0.02424		14.5	99.6597	0.01465		0.04105	-0.14206	14.5	94.9943		14.5	19.3248	9.65078
0.0406	-0.31655	14.75	0.02499		14.75	99.6328	0.01554		0.04133	-0.14185	14.75	94.9228		14.75	19.321	9.64555
0.04087	-0.31619	15	55.7055		15	17.4763	61.37		0.0416	-0.1416	15	95.0968		15	19.3153	9.63597
0.04115	-0.31571	15.25	0.1214		15.25	98.9345	0.03745		0.04188	-0.14157	15.25	94.3578		15.25	19.4262	9.57285
0.04143	-0.31546	15.5	0.05743		15.5	99.4051	0.01849		0.04216	-0.14149	15.5	94.6996		15.5	19.406	9.6127
0.04171	-0.31502	15.75	20.6121		15.75	47.2285	3.40151		0.04244	-0.14143	15.75	95.1164		15.75	19.3646	9.65182
0.04199	-0.31447	16	0.86589		16	95.7785	0.4399		0.04271	-0.14124	16	95.0203		16	19.5047	9.61909
0.04226	-0.31439	16.25	32.5362		16.25	33.332	40.2493		0.04299	-0.14118	16.25	40.1893		16.25	37.5361	4.20588
0.04254	-0.31388	16.5	89.6472		16.5	24.9272	10.7421		0.04327	-0.14097	16.5	3.79792		16.5	42.3394	20.4771
0.04282	-0.31351	16.75	88.146		16.75	26.4205	8.6593		0.04355	-0.14073	16.75	0.2977		16.75	43.0872	20.1709
0.0431	-0.31321	17	84.2939		17	31.5629	8.19451		0.04383	-0.14073	17	0.08208		17	43.215	20.1177
0.04337	-0.31277	17.25	76.7908		17.25	41.7333	7.46552		0.0441	-0.14033	17.25	0.08825		17.25	43.2708	20.0936
0.04365	-0.31243	17.5	76.41		17.5	50.5049	7.63964		0.04438	-0.14036	17.5	0.05934		17.5	43.3016	20.0818
0.04393	-0.3121	17.75	84.1509		17.75	53.8294	14.8464		0.04466	-0.14021	17.75	0.0239		17.75	43.3594	20.0567
0.04421	-0.31161	18	27.6821		18	78.857	4.64821		0.04494	-0.14004	18	0.06806		18	43.369	20.0504
0.04449	-0.31143	18.25	1.83259		18.25	97.7829	0.37129		0.04521	-0.14004	18.25	0.03612		18.25	43.3634	20.0524
0.04476	-0.31077	18.5	42.5408		18.5	71.034	8.49585		0.04549	-0.13985	18.5	0.02647		18.5	43.3914	20.0414
0.04504	-0.3106	18.75	0.54091		18.75	98.5724	0.60902		0.04577	-0.13968	18.75	0.02719		18.75	43.4365	20.0234
0.04532	-0.31023	19	1.40292		19	97.4699	1.07954		0.04605	-0.13945	19	0.01788		19	43.4115	20.0323
0.0456	-0.30989	19.25	2.09108		19.25	96.5246	1.26112		0.04633	-0.13937	19.25	0.01302		19.25	43.4239	20.0291
0.04587	-0.30941	19.5	19.1999		19.5	75.306	14.097		0.0466	-0.13916	19.5	0.01014		19.5	43.4343	20.0244
0.04615	-0.30913	19.75	10.3722		19.75	83.4003	8.92152		0.04688	-0.1391	19.75	0.02845		19.75	43.4291	20.0267
0.04643	-0.3088	20	28.3295		20	54.6763	31.4947		0.04716	-0.13909	20	0.01122		20	43.4291	20.0267
0.04671	-0.30852	20.25	75.618		20.25	52.566	27.271		0.04744	-0.13886	20.25	0.01533		20.25	43.7231	19.9034
0.04699	-0.30831	20.5	127.481		20.5	24.7369	28.8103		0.04771	-0.13865	20.5	0.00722		20.5	43.7566	19.8913
0.04726	-0.30779	20.75	87.3364		20.75	24.7767	10.6813		0.04799	-0.13859	20.75	0.00456		20.75	43.8877	19.8359
0.04754	-0.30745	21	87.7093		21	25.5637	10.6715		0.04827	-0.1384	21	0.0032		21	43.9365	19.8163
0.04782	-0.30718	21.25	86.6864		21.25	27.0036	10.444		0.04855	-0.13821	21.25	0.00296		21.25	43.9867	19.7927
0.0481	-0.30678	21.5	91.3181		21.5	27.4757	10.8402		0.04883	-0.13807	21.5	0.00346		21.5	43.961	19.8056
0.04837	-0.30646	21.75	91.5744		21.75	27.7412	10.7567		0.0491	-0.13794	21.75	0.02342		21.75	44.0375	19.7769
0.04865	-0.30605	22	18.7081		22	65.9743	2.17852		0.04938	-0.13786	22	0.00763		22	43.9919	19.797
0.04893	-0.30573	22.25	1.65803		22.25	95.1227	0.2212		0.04966	-0.13779	22.25	0.00243		22.25	44.0093	19.7908
0.04921	-0.30542	22.5	34.4281		22.5	43.9602	32.9548		0.04994	-0.1375	22.5	0.00138		22.5	44.0469	19.7729
0.04949	-0.30499	22.75	59.4697		22.75	52.9541	26.1976		0.05021	-0.1375	22.75	50.4075		22.75	17.6302	42.7229
0.04976	-0.30457	23	94.1116		23	49.5476	24.7281		0.05049	-0.13741	23	71.0569		23	16.6603	25.7963
0.05004	-0.30436	23.25	66.4768		23.25	53.8783	28.211		0.05077	-0.13722	23.25	73.2783		23.25	16.7188	23.9463
0.05032	-0.30401	23.5	47.984		23.5	56.4005	29.5606		0.05105	-0.13702	23.5	73.6732		23.5	16.793	23.2612
0.0506	-0.30378	23.75	70.3854		23.75	54.7178	28.4951		0.05133	-0.13689	23.75	74.6981		23.75	16.7174	22.6623
0.05087	-0.30346	24	84.4823		24	54.2057	24.147		0.0516	-0.13691	24	75.4768		24	16.6917	22.2931
0.05115	-0.30315	24.25	87.7526		24.25	54.2709	21.9965		0.05188	-0.13662	24.25	76.003		24.25	16.6678	21.9839
0.05143	-0.30273	24.5	86.8695		24.5	54.6285	23.0527		0.05216	-0.13664	24.5	75.8609		24.5	16.7616	21.4638
0.05171	-0.30245	24.75	86.9448		24.75	54.7477	23.2069		0.05244	-0.13653	24.75	76.3823		24.75	16.7446	21.2132
0.05199	-0.30216	25	95.7833		25	51.1553	27.9569		0.05271	-0.13649	25	76.5075		25	16.7766	20.9177
0.05226	-0.30184	25.25	85.1862		25.25	53.4097	21.1306		0.05299	-0.13618	25.25	77.1589		25.25	16.6739	20.9118
0.05254	-0.30149	25.5	2.98172		25.5	96.8044	0.96752		0.05327	-0.13607	25.5	76.8047		25.5	16.6327	21.3977
0.05282	-0.30127	25.75	67.1359		25.75	59.4237	19.807		0.05355	-0.1359	25.75	77.9269		25.75	16.6074	20.7082
0.0531	-0.30081	26	6.36235		26	93.2106	2.83247		0.05383	-0.13586	26	77.0102		26	16.806	20.3326
0.05337	-0.3006	26.25	5.27899		26.25	93.8691	2.97198		0.0541	-0.13575	26.25	78.1924		26.25	16.6325	20.4374
0.05365	-0.30016	26.5	7.78638		26.5	89.5331	6.68721		0.05438	-0.13544	26.5	78.4593		26.5	16.6024	20.4815
0.05393	-0.29989	26.75	0.42507		26.75	99.0311	0.65702		0.05466	-0.13563	26.75	79.128		26.75	16.5086	20.4424
0.05421	-0.29957	27	9.0262		27	85.0129	13.8071		0.05494	-0.13529	27	79.3205		27	16.5044	20.3516
0.05449	-0.29959	27.25	26.6085		27.25	49.0076	35.5799		0.05521	-0.13523	27.25	79.4277		27.25	16.5171	20.2336
0.05476	-0.29913	27.5	74.2625		27.5	44.1587	31.1021		0.05549	-0.13504	27.5	79.2958		27.5	16.546	20.2219
0.05504	-0.2988	27.75	68.686		27.75	17.7654	14.8527		0.05577	-0.13485	27.75	79.9266		27.75	16.4798	20.1413
0.05532	-0.2984	28	79.8383		28	16.7332	18.7152		0.05605	-0.13472	28	80.1693		28	16.4282	20.1246
0.0556	-0.29816	28.25	80.8482		28.25	16.979	15.7044		0.05633	-0.13464	28.25	80.2818		28.25	16.4528	19.9607
0.05587	-0.29772	28.5	81.3807		28.5	17.0255	15.2504		0.0566	-0.13435	28.5	80.4698		28.5	16.4903	19.847
0.05615	-0.29747	28.75	81.5375		28.75	17.0337	15.2704		0.05688	-0.13445	28.75	79.9783		28.75	16.5532	19.7866
0.05643	-0.29728	29	81.151		29	17.0664	15.3809		0.05716	-0.1342	29	80.6442		29	16.4623	19.9158
0.05671	-0.29711	29.25	81.6514		29.25	17.0565	15.2161		0.05744	-0.13397	29.25	80.6254		29.25	16.4483	20.0167
0.05699	-0.29665	29.5	81.599		29.5	17.1055	14.9072		0.05771	-0.13411	29.5	76.2917		29.5	16.4019	23.2654
0.05726	-0.2965	29.75	82.6754		29.75	17.1073	14.5355		0.05799	-0.1339	29.75	77.5654		29.75	16.463	22.039
0.05754	-0.29609	30	83.0113		30	17.1878	14.1037		0.05827	-0.13369	30	77.8491		30	16.4611	21.7689
0.05782	-0.29585	30.25	86.2373		30.25	17.3346	13.4471		0.05855	-0.13359	30.25	77.966		30.25	16.414	21.8707
0.0581	-0.29564	30.5	42.3297		30.5	30.5699	6.36822		0.05883	-0.13353	30.5	77.4645		30.5	16.4299	22.0461
0.05837	-0.29558	30.75	20.0917		30.75	56.9536	3.84834		0.0591	-0.13334	30.75	77.5841		30.75	16.4477	21.931
0.05865	-0.29505	31	1.77198		31	93.3842	1.02277		0.05938	-0.13317	31	77.3213		31	16.4579	21.9572
0.05893	-0.29493	31.25	77.9184		31.25	16.6783	17.116		0.05966	-0.133	31.25	76.775		31.25	16.449	22.3433
0.05921	-0.29461	31.5	82.2013		31.5	17.6251	14.9023		0.05994	-0.13298	31.5	75.9991		31.5	16.4691	22.816
0.05949	-0.2943	31.75	82.4495		31.75	17.7044	14.5374		0.06021	-0.13285	31.75	76.1748		31.75	16.483	22.6908
0.05976	-0.29409	32	82.3699		32	17.8021	14.2011		0.06049	-0.13271	32	75.9895		32	16.5209	22.6127
0.06004	-0.29382	32.25	83.1783		32.25	17.9017	13.7641		0.06077	-0.13275	32.25	76.7501		32.25	16.5222	22.0953
0.06032	-0.29365	32.5	83.4205		32.5	18.0124	13.4942		0.06105	-0.13248	32.5	76.3934		32.5	16.5559	22.3865
0.0606	-0.29316	32.75	83.2956		32.75	18.1272	13.2282		0.06133	-0.13233	32.75	76.1905		32.75	16.517	22.7748
0.06087	-0.29297	33	84.077		33	18.0725	13.1178		0.0616	-0.13229	33	78.1149		33	16.1632	23.627
0.06115	-0.29276	33.25	84.6263		33.25	18.1126	12.9578		0.06188	-0.13222	33.25	76.7434		33.25	16.5485	22.584
0.06143	-0.2923	33.5	16.7085		33.5	54.111	2.51361		0.06216	-0.13212	33.5	79.2881		33.5	16.5884	21.3709
0.06171	-0.29205	33.75	51.4343		33.75	22.2803	72.196		0.06244	-0.13182	33.75	79.3993		33.75	16.9503	19.2355
0.06199	-0.29188	34	73.38		34	42.0598	16.4598		0.06271	-0.13162	34	81.1502		34	16.6799	19.0818
0.06226	-0.29159	34.25	82.3881		34.25	44.4875	14.7092		0.06299	-0.1317	34.25	81.1407		34.25	16.6833	19.0476
0.06254	-0.2914	34.5	3.70316		34.5	93.6878	0.65496		0.06327	-0.13145	34.5	81.5026		34.5	16.6289	19.0594
0.06282	-0.29117	34.75	10.5259		34.75	85.9276	1.96824		0.06355	-0.1314	34.75	81.7853		34.75	16.5956	19.0142
0.0631	-0.29094	35	8.2038		35	87.7128	2.39614		0.06383	-0.13128	35	79.7185		35	16.9581	18.5374
0.06337	-0.29071	35.25	0.48911		35.25	97.6497	0.38304		0.0641	-0.13105	35.25	81.5993		35.25	16.6444	18.8804
0.06365	-0.29033	35.5	3.59117		35.5	93.1163	1.91307		0.06438	-0.13096	35.5	81.2941		35.5	16.6799	18.8116
0.06393	-0.29001	35.75	4.68811		35.75	90.2443	4.46756		0.06466	-0.13082	35.75	81.4812		35.75	16.6495	18.8991
0.06421	-0.28982	36	0.35088		36	97.6755	0.7973		0.06494	-0.13069	36	82.0896		36	16.5806	18.9554
0.06449	-0.28955	36.25	0.15489		36.25	98.2846	0.3943		0.06521	-0.13065	36.25	81.6995		36.25	16.6246	18.8236
0.06476	-0.28938	36.5	0.13172		36.5	98.2055	0.37585		0.06549	-0.13037	36.5	80.3561		36.5	16.7535	18.6225
0.06504	-0.289	36.75	0.2218		36.75	98.0205	0.52293		0.06577	-0.13037	36.75	81.2645		36.75	16.7196	18.8368
0.06532	-0.28877	37	0.65951		37	97.2749	1.04704		0.06605	-0.13023	37	81.6869		37	16.6202	18.9786
0.0656	-0.28844	37.25	10.6799		37.25	52.3384	31.3393		0.06633	-0.12996	37.25	81.4418		37.25	16.634	19.0267
0.06587	-0.28825	37.5	1.85025		37.5	84.6345	5.59941		0.0666	-0.12983	37.5	80.659		37.5	16.7814	18.8167
0.06615	-0.28802	37.75	12.459		37.75	56.1532	4.09938		0.06688	-0.12977	37.75	81.4985		37.75	16.6479	19.0734
0.06643	-0.28768	38	0.17253		38	97.6847	0.0699		0.06716	-0.1296	38	80.5829		38	16.7852	19.0559
0.06671	-0.28753	38.25	0.23497		38.25	97.4866	0.07698		0.06744	-0.12956	38.25	80.6498		38.25	16.7436	19.176
0.06699	-0.2872	38.5	6.60226		38.5	72.5208	1.90075		0.06771	-0.12949	38.5	80.4554		38.5	16.7434	19.3036
0.06726	-0.28709	38.75	2.08248		38.75	89.4514	0.93044		0.06799	-0.12926	38.75	80.1167		38.75	16.7769	19.4377
0.06754	-0.28667	39	1.37577		39	91.5037	4.14273		0.06827	-0.12918	39	80.0726		39	16.7561	19.7091
0.06782	-0.28654	39.25	0.61348		39.25	95.3482	1.95157		0.06855	-0.12909	39.25	80.0586		39.25	16.7098	20.0253
0.0681	-0.28621	39.5	0.64353		39.5	95.382	1.93685		0.06883	-0.12892	39.5	79.2843		39.5	16.7658	20.1292
0.06837	-0.28589	39.75	13.8243		39.75	47.395	9.84482		0.0691	-0.12869	39.75	79.0837		39.75	16.7693	20.272
0.06865	-0.2856	40	61.701		40	28.0306	15.4252		0.06938	-0.1285	40	79.0989		40	16.7814	20.3032
0.06893	-0.28547	40.25	87.9056		40.25	26.5107	19.783		0.06966	-0.12827	40.25	79.0736		40.25	16.8376	20.1241
0.06921	-0.2852	40.5	80.9817		40.5	34.0894	17.7971		0.06994	-0.12806	40.5	78.9739		40.5	16.7908	20.4824
0.06949	-0.28484	40.75	82.1291		40.75	39.2753	18.0281		0.07021	-0.12792	40.75	78.1917		40.75	16.7596	21.1678
0.06976	-0.28472	41	88.9589		41	38.6888	18.9142		0.07049	-0.12777	41	78.0717		41	16.8103	21.0086
0.07004	-0.28432	41.25	89.6315		41.25	37.752	18.541		0.07077	-0.1275	41.25	78.3462		41.25	16.838	20.889
0.07032	-0.28423	41.5	88.4994		41.5	37.8349	18.076		0.07105	-0.12745	41.5	78.5049		41.5	16.8161	20.8304
0.0706	-0.28388	41.75	88.5369		41.75	37.9233	17.9908		0.07133	-0.12735	41.75	78.5208		41.75	16.8443	20.827
0.07087	-0.28364	42	89.4748		42	37.6721	18.226		0.0716	-0.12739	42	78.4979		42	16.815	20.9032
0.07115	-0.28329	42.25	88.229		42.25	37.8288	18.042		0.07188	-0.12693	42.25	78.4332		42.25	16.8175	20.9208
0.07143	-0.28316	42.5	88.0695		42.5	37.9115	18.2598		0.07216	-0.12689	42.5	77.9314		42.5	16.8119	21.2364
0.07171	-0.28291	42.75	87.8466		42.75	38.09	18.5151		0.07244	-0.12672	42.75	76.6623		42.75	16.7685	22.2775
0.07199	-0.28266	43	87.6014		43	38.2292	18.7369		0.07271	-0.12682	43	75.1845		43	16.8138	23.1455
0.07226	-0.28241	43.25	87.695		43.25	38.3222	18.8313		0.07299	-0.12666	43.25	77.3574		43.25	16.8939	21.5601
0.07254	-0.2822	43.5	87.7292		43.5	38.2661	18.9628		0.07327	-0.12644	43.5	74.4767		43.5	19.6132	21.3726
0.07282	-0.28178	43.75	87.3119		43.75	38.4407	18.9331		0.07355	-0.12626	43.75	76.3133		43.75	20.6489	23.2627
0.0731	-0.28169	44	87.1846		44	38.6532	19.1014		0.07383	-0.12617	44	76.7998		44	21.7333	23.1661
0.07337	-0.28129	44.25	86.4798		44.25	39.0275	19.1728		0.0741	-0.12594	44.25	78.059		44.25	22.5794	23.4439
0.07365	-0.28114	44.5	86.5666		44.5	39.1814	19.6239		0.07438	-0.12592	44.5	78.2348		44.5	23.6486	23.5622
0.07393	-0.28083	44.75	86.3216		44.75	39.5101	19.7441		0.07466	-0.12571	44.75	78.483		44.75	24.7873	23.7277
0.07421	-0.28074	45	86.5712		45	39.7599	19.7697		0.07494	-0.12571	45	77.2212		45	26.6536	23.1774
0.07449	-0.28056	45.25	86.5952		45.25	40.0834	19.9255		0.07521	-0.12565	45.25	77.4659		45.25	28.2953	23.0496
0.07476	-0.2802	45.5	86.7532		45.5	40.3439	20.1478		0.07549	-0.12542	45.5	77.248		45.5	29.7984	22.8193
0.07504	-0.27986	45.75	86.6908		45.75	40.5734	20.2649		0.07577	-0.12552	45.75	76.0868		45.75	31.36	22.449
0.07532	-0.27963	46	86.8211		46	40.8711	20.1366		0.07605	-0.12508	46	73.4637		46	33.0146	22.1542
0.0756	-0.27938	46.25	86.7741		46.25	41.1168	20.2497		0.07633	-0.12502	46.25	71.7618		46.25	34.084	22.3192
0.07587	-0.27904	46.5	86.0354		46.5	41.6618	20.6421		0.0766	-0.12502	46.5	67.2684		46.5	36.5052	21.4183
0.07615	-0.27887	46.75	85.6172		46.75	41.8949	21.1561		0.07688	-0.12489	46.75	64.7562		46.75	38.4634	20.9303
0.07643	-0.27864	47	84.9604		47	42.2101	21.486		0.07716	-0.1246	47	61.5409		47	39.4862	20.8792
0.07671	-0.27846	47.25	36.0693		47.25	63.0466	9.2148		0.07744	-0.12458	47.25	50.3812		47.25	15.8052	38.7995
0.07699	-0.27816	47.5	66.032		47.5	16.7264	28.703		0.07771	-0.12441	47.5	55.073		47.5	16.57	37.4026
0.07726	-0.27793	47.75	70.8756		47.75	16.8778	25.9054		0.07799	-0.1243	47.75	62.9947		47.75	16.4118	34.1825
0.07754	-0.27759	48	72.6508		48	16.9474	24.0743		0.07827	-0.12424	48	60.5533		48	16.1703	36.1318
0.07782	-0.2774	48.25	36.0891		48.25	31.0925	10.9644		0.07855	-0.12418	48.25	48.5134		48.25	16.2443	39.1885
0.0781	-0.27726	48.5	6.52256		48.5	73.8017	2.14674		0.07883	-0.12405	48.5	58.7245		48.5	16.1218	36.637
0.07837	-0.27694	48.75	5.97956		48.75	74.3221	13.5588		0.0791	-0.12413	48.75	0.51421		48.75	95.0621	0.34082
0.07865	-0.27679	49	60.441		49	16.6538	35.4221		0.07938	-0.1239	49	21.5777		49	15.024	18.1926
0.07893	-0.27646	49.25	70.7024		49.25	16.8047	25.114		0.07966	-0.12376	49.25	53.148		49.25	16.3732	37.8527
0.07921	-0.27629	49.5	73.6442		49.5	16.8309	23.3479		0.07994	-0.12373	49.5	59.7661		49.5	16.173	36.0715
0.07949	-0.27612	49.75	74.3604		49.75	16.8525	22.5675		0.08021	-0.12378	49.75	62.7588		49.75	16.1525	34.9341
0.07976	-0.27579	50	75.0011		50	16.8567	21.8202		0.08049	-0.12359	50	63.4515		50	16.22	33.5489
0.08004	-0.27558	50.25	75.7031		50.25	16.8643	21.3031		0.08077	-0.12367	50.25	64.467		50.25	16.2423	32.5791
0.08032	-0.27553	50.5	76.3503		50.5	16.8338	20.9639		0.08105	-0.12353	50.5	65.2878		50.5	16.2219	32.021
0.0806	-0.27518	50.75	76.6534		50.75	16.8518	20.6785		0.08133	-0.12333	50.75	66.1165		50.75	16.2408	31.8315
0.08087	-0.27478	51	76.8065		51	16.8689	20.446		0.0816	-0.12334	51	64.1247		51	16.0599	33.8469
0.08115	-0.27457	51.25	77.0698		51.25	16.8662	20.2356		0.08188	-0.12342	51.25	53.1353		51.25	15.8754	39.9575
0.08143	-0.27452	51.5	77.2514		51.5	16.8428	20.1723		0.08216	-0.12325	51.5	47.681		51.5	16.5617	39.2195
0.08171	-0.27423	51.75	77.1933		51.75	16.866	20.1879		0.08244	-0.12315	51.75	48.7814		51.75	15.8023	41.1661
0.08199	-0.27406	52	77.1709		52	16.8508	20.2651		0.08271	-0.12313	52	48.7692		52	15.7556	41.5701
0.08226	-0.27368	52.25	76.8471		52.25	16.8527	20.5377		0.08299	-0.123	52.25	47.3163		52.25	15.7699	42.0492
0.08254	-0.27348	52.5	76.2069		52.5	16.832	21.195		0.08327	-0.12287	52.5	46.5127		52.5	15.7956	42.2119
0.08282	-0.27322	52.75	75.1234		52.75	16.8124	22.0967		0.08355	-0.12292	52.75	45.7204		52.75	15.787	42.4087
0.0831	-0.27297	53	74.2628		53	16.7937	22.9068		0.08383	-0.12277	53	45.5337		53	15.7245	42.6177
0.08337	-0.27276	53.25	73.4848		53.25	16.7497	23.7811		0.0841	-0.1227	53.25	44.8248		53.25	15.8005	42.5346
0.08365	-0.27242	53.5	73.0616		53.5	16.7623	24.1371		0.08438	-0.12258	53.5	44.7516		53.5	15.7436	42.8313
0.08393	-0.27223	53.75	72.2233		53.75	16.799	24.7131		0.08466	-0.12252	53.75	44.5414		53.75	15.7533	42.8496
0.08421	-0.27202	54	71.8379		54	16.8305	24.8303		0.08494	-0.12237	54	44.5247		54	15.8153	42.6586
0.08449	-0.27163	54.25	72.1906		54.25	16.771	24.7896		0.08521	-0.12229	54.25	0.54772		54.25	93.7051	0.54423
0.08476	-0.27146	54.5	71.9061		54.5	16.789	24.9517		0.08549	-0.12208	54.5	12.1675		54.5	38.5973	22.1519
0.08504	-0.27135	54.75	71.4988		54.75	16.8099	25.1257		0.08577	-0.12201	54.75	11.0265		54.75	44.078	19.6324
0.08532	-0.27099	55	71.5098		55	16.8013	25.1753		0.08605	-0.12189	55	6.75223		55	54.6124	15.7401
0.0856	-0.27089	55.25	72.5439		55.25	16.7697	24.6435		0.08633	-0.12199	55.25	25.6922		55.25	39.0829	21.8026
0.08587	-0.27064	55.5	72.1308		55.5	16.794	24.7596		0.0866	-0.12178	55.5	33.7955		55.5	39.1459	21.7019
0.08615	-0.27032	55.75	71.9668		55.75	16.8827	24.5079		0.08688	-0.12146	55.75	38.3813		55.75	39.5462	21.4397
0.08643	-0.27003	56	71.4501		56	16.8841	24.612		0.08716	-0.12168	56	44.6784		56	37.1384	22.7423
0.08671	-0.26992	56.25	70.9963		56.25	16.7659	25.6824		0.08744	-0.12153	56.25	49.6142		56.25	32.4227	24.7753
0.08699	-0.26967	56.5	69.88		56.5	16.847	26.3425		0.08771	-0.12138	56.5	52.9828		56.5	36.191	22.7237
0.08726	-0.26927	56.75	69.1987		56.75	16.7745	27.3014		0.08799	-0.12115	56.75	44.2584		56.75	38.0187	22.1424
0.08754	-0.26923	57	68.3925		57	16.7454	28.1948		0.08827	-0.12104	57	39.7531		57	38.7393	21.86
0.08782	-0.26891	57.25	67.1776		57.25	16.782	28.9836		0.08855	-0.121	57.25	39.1062		57.25	38.6486	21.9947
0.0881	-0.26866	57.5	66.3328		57.5	16.8001	29.6524		0.08883	-0.12094	57.5	36.6922		57.5	40.3338	21.1086
0.08837	-0.26839	57.75	65.3936		57.75	16.7097	31.0356		0.0891	-0.12081	57.75	20.0746		57.75	42.3399	20.3868
0.08865	-0.26831	58	63.6602		58	16.7336	32.6042		0.08938	-0.12075	58	2.24223		58	83.6169	9.24469
0.08893	-0.26803	58.25	62.6578		58.25	16.6574	34.1541		0.08966	-0.12062	58.25	12.5235		58.25	38.3714	22.3361
0.08921	-0.26784	58.5	62.2126		58.5	16.5395	35.4522		0.08994	-0.12044	58.5	11.0275		58.5	46.1912	18.8138
0.08949	-0.26749	58.75	62.2852		58.75	16.3998	36.132		0.09021	-0.12035	58.75	13.006		58.75	39.5646	21.7547
0.08976	-0.26742	59	58.9288		59	16.7471	36.9774		0.09049	-0.12029	59	19.3249		59	31.6814	26.4188
0.09004	-0.26713	59.25	58.4769		59.25	16.8166	37.7925		0.09077	-0.12008	59.25	25.877		59.25	26.0427	30.3292
0.09032	-0.26683	59.5	1.55227		59.5	88.2225	0.98498		0.09105	-0.1201	59.5	0.5148		59.5	94.2	1.74322
0.0906	-0.26665	59.75	76.3059		59.75	16.5438	89.93		0.09133	-0.11985	59.75	1.2861		59.75	90.9927	2.7594
0.09087	-0.26646	60	76.6315		60	11.705	122.603		0.0916	-0.1198	60	11.5353		60	40.6322	21.0536
0.09115	-0.26612	60.25	0.4587		60.25	93.3728	0.5963		0.09188	-0.11978	60.25	4.98521		60.25	62.4691	13.9422
0.09143	-0.26587	60.5	0.0721		60.5	97.5182	0.13762		0.09216	-0.11957	60.5	7.47002		60.5	41.4748	20.7132
0.09171	-0.26568	60.75	0.0198		60.75	98.2482	0.05069		0.09244	-0.11949	60.75	1.54885		60.75	73.8207	10.4043
0.09199	-0.26559	61	0.03294		61	98.1632	0.07173		0.09271	-0.11945	61	8.39224		61	35.4019	24.0606
0.09226	-0.26541	61.25	0.03884		61.25	98.1386	0.07518		0.09299	-0.11928	61.25	13.7542		61.25	33.8701	25.0919
0.09254	-0.26511	61.5	0.19324		61.5	96.6155	0.22848		0.09327	-0.11926	61.5	0.69582		61.5	87.9966	7.035
0.09282	-0.26498	61.75	45.0618		61.75	17.0001	48.528		0.09355	-0.11909	61.75	22.8155		61.75	15.6687	47.6795
0.0931	-0.26463	62	0.40844		62	94.7639	0.47323		0.09383	-0.11907	62	5.25864		62	49.8386	13.9215
0.09337	-0.26442	62.25	0.03119		62.25	98.2018	0.06514		0.0941	-0.11886	62.25	12.9913		62.25	38.8003	22.1151
0.09365	-0.26415	62.5	0.01736		62.5	98.3698	0.0486		0.09438	-0.11875	62.5	2.10915		62.5	86.503	4.45955
0.09393	-0.264	62.75	0.01288		62.75	98.5194	0.04579		0.09466	-0.11861	62.75	5.85143		62.75	52.6715	16.5845
0.09421	-0.26381	63	0.01019		63	98.5134	0.04421		0.09494	-0.11875	63	1.22938		63	81.6746	9.88572
0.09449	-0.26353	63.25	0.18322		63.25	97.1672	0.23322		0.09521	-0.11842	63.25	9.79233		63.25	33.9913	25.0025
0.09476	-0.26333	63.5	0.03937		63.5	98.3403	0.07071		0.09549	-0.11846	63.5	1.47139		63.5	83.3229	7.0205
0.09504	-0.26311	63.75	0.01567		63.75	98.4878	0.04513		0.09577	-0.11819	63.75	2.20557		63.75	77.6483	9.71918
0.09532	-0.26297	64	0.01174		64	98.5727	0.04426		0.09605	-0.11814	64	0.0178		64	98.4723	0.19732
0.0956	-0.2627	64.25	0.01415		64.25	98.5691	0.05294		0.09633	-0.11796	64.25	0.01524		64.25	98.6989	0.13744
0.09587	-0.26257	64.5	0.10628		64.5	97.8908	0.15004		0.0966	-0.11781	64.5	0.00786		64.5	98.7607	0.11857
0.09615	-0.26219	64.75	0.42947		64.75	95.7831	0.34776		0.09688	-0.11768	64.75	0.00454		64.75	98.763	0.11824
0.09643	-0.26202	65	0.02594		65	98.3796	0.06005		0.09716	-0.11773	65	0.00382		65	98.8025	0.12103
0.09671	-0.26177	65.25	0.01228		65.25	98.5367	0.0436		0.09744	-0.11751	65.25	0.00379		65.25	98.8075	0.12423
0.09699	-0.26154	65.5	0.00836		65.5	98.4836	0.04263		0.09771	-0.11745	65.5	0.01682		65.5	20.511	40.4144
0.09726	-0.26135	65.75	0.00711		65.75	98.4642	0.04274		0.09799	-0.11733	65.75	40.5914		65.75	15.6249	60.8521
0.09754	-0.2612	66	0.0066		66	98.5365	0.04235		0.09827	-0.11716	66	59.9837		66	15.7027	44.1533
0.09782	-0.26095	66.25	0.00624		66.25	98.4902	0.04192		0.09855	-0.1172	66.25	73.0768		66.25	15.7294	43.6695
0.0981	-0.2607	66.5	0.00657		66.5	98.531	0.04207		0.09883	-0.11697	66.5	79.343		66.5	15.4237	46.5928
0.09837	-0.26036	66.75	0.00603		66.75	98.5567	0.04036		0.0991	-0.11695	66.75	59.0366		66.75	15.3141	48.4313
0.09865	-0.26019	67	0.0064		67	98.4697	0.04168		0.09938	-0.1167	67	37.0876		67	15.3141	48.4313
0.09893	-0.26015	67.25	0.0064		67.25	98.5427	0.04139		0.09966	-0.11672	67.25	0.50458		67.25	91.6179	1.20419
0.09921	-0.25982	67.5	0.00629		67.5	98.5101	0.04084		0.09994	-0.11663	67.5	--		67.5		--
0.09949	-0.25958	67.75	0.00628		67.75	98.4669	0.04101		0.10021	-0.11644	67.75	--		67.75		--
0.09976	-0.2594	68	0.00618		68	98.4777	0.04094		0.10049	-0.11636	68	--		68		--
0.10004	-0.25927	68.25	0.00604		68.25	98.4746	0.04075		0.10077	-0.11627	68.25	--		68.25		--
0.10032	-0.25891	68.5	0.00574		68.5	98.5316	0.04077		0.10105	-0.1163	68.5	--		68.5		--
0.1006	-0.25891	68.75	0.00588		68.75	98.5796	0.04092		0.10133	-0.11598	68.75	--		68.75		--
0.10087	-0.25874	69	0.00574		69	98.5408	0.04061		0.1016	-0.11598	69	--		69		--
0.10115	-0.25837	69.25	0.00565		69.25	98.5217	0.04057		0.10188	-0.11594	69.25	--		69.25		--
0.10143	-0.25816	69.5	0.00568		69.5	98.5182	0.04107		0.10216	-0.11569	69.5	--		69.5		--
0.10171	-0.25795	69.75	0.00586		69.75	98.5106	0.0411		0.10244	-0.11567	69.75	--		69.75		--
0.10199	-0.25769	70	0.00586		70	98.5646	0.04155		0.10271	-0.11544	70	--		70		--
0.10226	-0.25759	70.25	0.00602		70.25	98.5755	0.04186		0.10299	-0.11539	70.25	--		70.25		--
0.10254	-0.25729	70.5	0.00576		70.5	98.5493	0.04141		0.10327	-0.11535	70.5	--		70.5		--
0.10282	-0.25713	70.75	0.00476		70.75	98.8368	0.03796		0.10355	-0.11514	70.75	--		70.75		--
0.1031	-0.25685	71	0.00407		71	99.0684	0.03754		0.10383	-0.11512	71	--		71		--
0.10337	-0.25677	71.25	0.00416		71.25	98.966	0.03861		0.1041	-0.11497	71.25	--		71.25		--
0.10365	-0.25654	71.5	0.00477		71.5	99.0779	0.04069		0.10438	-0.11499	71.5	--		71.5		--
0.10393	-0.25635	71.75	0.0053		71.75	99.0607	0.04135		0.10466	-0.11476	71.75	--		71.75		--
0.10421	-0.25614	72	0.00544		72	99.0416	0.04128		0.10494	-0.11468	72	--		72		--
0.10449	-0.25578	72.25	0.00521		72.25	99.1472	0.04106		0.10521	-0.11447	72.25	--		72.25		--
0.10476	-0.25566	72.5	0.00566		72.5	99.0416	0.04219		0.10549	-0.11436	72.5	--		72.5		--
0.10504	-0.25545	72.75	0.00603		72.75	99.0555	0.04316		0.10577	-0.11424	72.75	--		72.75		--
0.10532	-0.25526	73	0.00549		73	98.944	0.04126		0.10605	-0.11432	73	--		73		--
0.1056	-0.25511	73.25	43.0236		73.25	16.4548	52.9877		0.10633	-0.11413	73.25	--		73.25		--
0.10587	-0.25484	73.5	46.6154		73.5	16.6279	48.1026		0.1066	-0.11399	73.5	--		73.5		--
0.10615	-0.25467	73.75	61.0799		73.75	17.3657	30.9379		0.10688	-0.11401	73.75	--		73.75		--
0.10643	-0.25437	74	46.1444		74	16.1529	27.7003		0.10716	-0.11388	74	--		74		--
0.10671	-0.25439	74.25	55.1329		74.25	16.5651	40.9535		0.10744	-0.11375	74.25	--		74.25		--
0.10699	-0.25404	74.5	66.2458		74.5	16.6215	30.9549		0.10771	-0.11377	74.5	--		74.5		--
0.10726	-0.25374	74.75	67.2753		74.75	16.6207	29.9889		0.10799	-0.11356	74.75	--		74.75		--
0.10754	-0.25366	75	67.6545		75	16.6648	29.4298		0.10827	-0.11356	75	--		75		--
0.10782	-0.25345	75.25	68.1449		75.25	16.6427	29.1771		0.10855	-0.11359	75.25	--		75.25		--
0.1081	-0.2533	75.5	67.8821		75.5	16.6197	29.4825		0.10883	-0.11373	75.5	--		75.5		--
0.10837	-0.25301	75.75	63.7493		75.75	16.5429	33.7128		0.1091	-0.1135	75.75	--		75.75		--
0.10865	-0.25294	76	58.7346		76	16.4773	38.5391		0.10938	-0.11354	76	--		76		--
0.10893	-0.25265	76.25	57.3552		76.25	16.5413	39.4501		0.10966	-0.11342	76.25	--		76.25		--
0.10921	-0.25242	76.5	58.4755		76.5	16.4883	38.7181		0.10994	-0.11354	76.5	--		76.5		--
0.10949	-0.25213	76.75	60.3159		76.75	16.5376	36.7643		0.11021	-0.11338	76.75	--		76.75		--
0.10976	-0.25198	77	62.5532		77	16.5851	34.5403		0.11049	-0.11352	77	--		77		--
0.11004	-0.25181	77.25	64.8737		77.25	16.5867	32.3685		0.11077	-0.11346	77.25	--		77.25		--
0.11032	-0.25164	77.5	66.321		77.5	16.6056	30.9866		0.11105	-0.11358	77.5	--		77.5		--
0.1106	-0.25147	77.75	66.9253		77.75	16.6466	30.1944		0.11133	-0.11359	77.75	--		77.75		--
0.11087	-0.25122	78	67.4774		78	16.6529	29.6289		0.1116	-0.11352	78	--		78		--
0.11115	-0.25095	78.25	67.8755		78.25	16.6673	29.2078		0.11188	-0.11359	78.25	--		78.25		--
0.11143	-0.25082	78.5	68.0246		78.5	16.6767	28.9859		0.11216	-0.11356	78.5	--		78.5		--
0.11171	-0.25059	78.75	68.2417		78.75	16.6795	28.7823		0.11244	-0.11354	78.75	--		78.75		--
0.11199	-0.25044	79	68.2722		79	16.6683	28.6757		0.11271	-0.11358	79	--		79		--
0.11226	-0.25005	79.25	67.7248		79.25	16.7033	28.9811		0.11299	-0.1135	79.25	--		79.25		--
0.11254	-0.24992	79.5	66.6798		79.5	16.6575	30.122		0.11327	-0.11363	79.5	--		79.5		--
0.11282	-0.24983	79.75	64.1407		79.75	16.5939	32.6105		0.11355	-0.1135	79.75	--		79.75		--
0.1131	-0.24962	80	58.7478		80	16.5072	37.8298		0.11383	-0.11354	80	--		80		--
0.11337	-0.24941	80.25	53.4219		80.25	16.4834	42.7449		0.1141	-0.11356	80.25	--		80.25		--
0.11365	-0.24931	80.5	46.8033		80.5	16.3224	49.8228		0.11438	-0.11367	80.5	--		80.5		--
0.11393	-0.24893	80.75	42.1387		80.75	16.336	54.2416		0.11466	-0.11369	80.75	--		80.75		--
0.11421	-0.24868	81	40.178		81	16.3229	56.3186		0.11494	-0.11367	81	--		81		--
0.11449	-0.2487	81.25	38.1536		81.25	16.3025	58.2407		0.11521	-0.11358	81.25	--		81.25		--
0.11476	-0.24843	81.5	37.384		81.5	16.2548	59.3572		0.11549	-0.11375	81.5	--		81.5		--
0.11504	-0.2482	81.75	35.9412		81.75	16.1238	61.4766		0.11577	-0.11371	81.75	--		81.75		--
0.11532	-0.24792	82	33.8065		82	16.2137	63.2527		0.11605	-0.11373	82	--		82		--
0.1156	-0.24799	82.25	32.1011		82.25	16.1563	65.183		0.11633	-0.11361	82.25	--		82.25		--
0.11587	-0.24754	82.5	24.9958		82.5	16.1191	71.9064		0.1166	-0.11371	82.5	--		82.5		--
0.11615	-0.24738	82.75	24.7817		82.75	16.1553	71.8861		0.11688	-0.11358	82.75	--		82.75		--
0.11643	-0.24714	83	25.3793		83	16.2076	71.1046		0.11716	-0.11348	83	--		83		--
0.11671	-0.24702	83.25	27.3205		83.25	16.2004	69.8337		0.11744	-0.11358	83.25	--		83.25		--
0.11699	-0.24693	83.5	31.3339		83.5	16.3195	65.7677		0.11771	-0.11361	83.5	--		83.5		--
0.11726	-0.2466	83.75	35.7238		83.75	16.3323	61.4006		0.11799	-0.11365	83.75	--		83.75		--
0.11754	-0.24658	84	42.7998		84	16.7647	52.5455		0.11827	-0.11363	84	--		84		--
0.11782	-0.24618	84.25	53.0354		84.25	16.3144	44.5202		0.11855	-0.11352	84.25	--		84.25		--
0.1181	-0.24609	84.5	1.31065		84.5	88.4625	0.99353		0.11883	-0.11363	84.5	--		84.5		--
0.11837	-0.24599	84.75	0.27195		84.75	95.7458	0.22795		0.1191	-0.11367	84.75	--		84.75		--
0.11865	-0.24576	85	0.21563		85	96.3536	0.18111		0.11938	-0.11356	85	--		85		--
0.11893	-0.24544	85.25	0.0831		85.25	97.5277	0.10447		0.11966	-0.11363	85.25	--		85.25		--
0.11921	-0.24536	85.5	0.02096		85.5	98.1029	0.0398		0.11994	-0.11384	85.5	--		85.5		--
0.11949	-0.24511	85.75	0.01156		85.75	98.2242	0.03261		0.12021	-0.11358	85.75	--		85.75		--
0.11976	-0.24498	86	0.00769		86	98.2824	0.03094		0.12049	-0.11363	86	--		86		--
0.12004	-0.24469	86.25	0.00616		86.25	98.3292	0.03034		0.12077	-0.11365	86.25	--		86.25		--
0.12032	-0.24469	86.5	0.00533		86.5	98.3944	0.03052		0.12105	-0.11356	86.5	--		86.5		--
0.1206	-0.24448	86.75	--		86.75		--		0.12133	-0.11377	86.75	--		86.75		--
0.12087	-0.24412	87	--		87		--		0.1216	-0.11375	87	--		87		--
0.12115	-0.24412	87.25	--		87.25		--		0.12188	-0.11363	87.25	--		87.25		--
0.12143	-0.24389	87.5	--		87.5		--		0.12216	-0.11365	87.5	--		87.5		--
0.12171	-0.2437	87.75	--		87.75		--		0.12244	-0.11371	87.75	--		87.75		--
0.12199	-0.24372	88	--		88		--		0.12271	-0.11367	88	--		88		--
0.12226	-0.2433	88.25	--		88.25		--		0.12299	-0.11371	88.25	--		88.25		--
0.12254	-0.24322	88.5	--		88.5		--		0.12327	-0.11363	88.5	--		88.5		--
0.12282	-0.24319	88.75	--		88.75		--		0.12355	-0.11359	88.75	--		88.75		--
0.1231	-0.24296	89	--		89		--		0.12383	-0.11358	89	--		89		--
0.12337	-0.24259	89.25	--		89.25		--		0.1241	-0.11365	89.25	--		89.25		--
0.12365	-0.24242	89.5	--		89.5		--		0.12438	-0.11358	89.5	--		89.5		--
0.12393	-0.24221	89.75	--		89.75		--		0.12466	-0.11361	89.75	--		89.75		--
0.12421	-0.24212	90	--		90		--		0.12494	-0.11377	90	--		90		--
0.12449	-0.24198		--				--		0.12521	-0.1135		--				--
0.12476	-0.24185		--				--		0.12549	-0.11359		--				--
0.12504	-0.24175		--				--		0.12577	-0.1135		--				--
0.12532	-0.24139		--				--		0.12605	-0.11359		--				--
0.1256	-0.24137		--				--		0.12633	-0.11365		--				--
0.12587	-0.2412		--				--		0.1266	-0.11344		--				--
0.12615	-0.24103		--				--		0.12688	-0.11359		--				--
0.12643	-0.24082		--				--		0.12716	-0.11348		--				--
0.12671	-0.24053		--				--		0.12744	-0.1135		--				--
0.12699	-0.24034		--				--		0.12771	-0.1135		--				--
0.12726	-0.24036		--				--		0.12799	-0.11363		--				--
0.12754	-0.24021		--				--		0.12827	-0.11348		--				--
0.12782	-0.24004		--				--		0.12855	-0.11358		--				--
0.1281	-0.2399		--				--		0.12883	-0.11356		--				--
0.12837	-0.23967		--				--		0.1291	-0.11352		--				--
0.12865	-0.23945		--				--		0.12938	-0.1135		--				--
0.12893	-0.23937		--				--		0.12966	-0.11356		--				--
0.12921	-0.23908		--				--		0.12994	-0.11359		--				--
0.12949	-0.23912		--				--		0.13021	-0.1135		--				--
0.12976	-0.23864		--				--		0.13049	-0.11337		--				--
0.13004	-0.23861		--				--		0.13077	-0.1135		--				--
0.13032	-0.23847		--				--		0.13105	-0.11348		--				--
0.1306	-0.23821		--				--		0.13133	-0.11337		--				--
0.13087	-0.23809		--				--		0.1316	-0.1135		--				--
0.13115	-0.23794		--				--		0.13188	-0.11354		--				--
0.13143	-0.23788		--				--		0.13216	-0.1134		--				--
0.13171	-0.23784		--				--		0.13244	-0.11348		--				--
0.13199	-0.23763		--				--		0.13271	-0.11346		--				--
0.13226	-0.23729		--				--		0.13299	-0.11331		--				--
0.13254	-0.23712		--				--		0.13327	-0.11337		--				--
0.13282	-0.23704		--				--		0.13355	-0.11342		--				--
0.1331	-0.23695		--				--		0.13383	-0.11327		--				--
0.13337	-0.23664		--				--		0.1341	-0.11342		--				--
0.13365	-0.23662		--				--		0.13438	-0.11335		--				--
0.13393	-0.23639		--				--		0.13466	-0.11321		--				--
0.13421	-0.23618		--				--		0.13494	-0.11338		--				--
0.13449	-0.23594		--				--		0.13521	-0.1135		--				--
0.13476	-0.23588		--				--		0.13549	-0.11337		--				--
0.13504	-0.23584		--				--		0.13577	-0.11331		--				--
0.13532	-0.23553								0.13605	-0.11331
0.1356	-0.23525								0.13633	-0.11323
0.13587	-0.23527								0.1366	-0.11327
0.13615	-0.2351								0.13688	-0.11314
0.13643	-0.23489								0.13716	-0.11317
0.13671	-0.23477								0.13744	-0.11329
0.13699	-0.23471								0.13771	-0.11312
0.13726	-0.23435								0.13799	-0.11321
0.13754	-0.23428								0.13827	-0.11312
0.13782	-0.23407								0.13855	-0.11325
0.1381	-0.2341								0.13883	-0.11306
0.13837	-0.23378								0.1391	-0.11314
0.13865	-0.23366								0.13938	-0.11308
0.13893	-0.23351								0.13966	-0.11298
0.13921	-0.23321								0.13994	-0.11298
0.13949	-0.23326								0.14021	-0.11308
0.13976	-0.2329								0.14049	-0.11293
0.14004	-0.23269								0.14077	-0.11306
0.14032	-0.23286								0.14105	-0.11275
0.1406	-0.23254								0.14133	-0.11285
0.14087	-0.23231								0.1416	-0.11289
0.14115	-0.23235								0.14188	-0.11291
0.14143	-0.23208								0.14216	-0.11291
0.14171	-0.23187								0.14244	-0.11293
0.14199	-0.23178								0.14271	-0.11296
0.14226	-0.23168								0.14299	-0.11295
0.14254	-0.2313								0.14327	-0.11283
0.14282	-0.23139								0.14355	-0.11279
0.1431	-0.23118								0.14383	-0.11275
0.14337	-0.23088								0.1441	-0.11283
0.14365	-0.23092								0.14438	-0.11266
0.14393	-0.23057								0.14466	-0.11272
0.14421	-0.23048								0.14494	-0.11274
0.14449	-0.23031								0.14521	-0.11279
0.14476	-0.23023								0.14549	-0.1127
0.14504	-0.23006								0.14577	-0.11268
0.14532	-0.22973								0.14605	-0.11268
0.1456	-0.22977								0.14633	-0.11268
0.14587	-0.22949								0.1466	-0.11264
0.14615	-0.22931								0.14688	-0.1127
0.14643	-0.22918								0.14716	-0.11277
0.14671	-0.22893								0.14744	-0.11268
0.14699	-0.22905								0.14771	-0.11266
0.14726	-0.22868								0.14799	-0.11268
0.14754	-0.22857								0.14827	-0.11251
0.14782	-0.22838								0.14855	-0.1127
0.1481	-0.22832								0.14883	-0.11251
0.14837	-0.22817								0.1491	-0.1126
0.14865	-0.22813								0.14938	-0.11254
0.14893	-0.22792								0.14966	-0.11262
0.14921	-0.22758								0.14994	-0.11264
0.14949	-0.22762								0.15021	-0.11245
0.14976	-0.22735								0.15049	-0.11253
0.15004	-0.22714								0.15077	-0.11253
0.15032	-0.22704								0.15105	-0.11247
0.1506	-0.22706								0.15133	-0.11239
0.15087	-0.22678								0.1516	-0.11239
0.15115	-0.22666								0.15188	-0.11243
0.15143	-0.22641								0.15216	-0.11253
0.15171	-0.22624								0.15244	-0.11249
0.15199	-0.22611								0.15271	-0.11251
0.15226	-0.22603								0.15299	-0.11253
0.15254	-0.22588								0.15327	-0.11247
0.15282	-0.22575								0.15355	-0.11239
0.1531	-0.22559								0.15383	-0.11239
0.15337	-0.22552								0.1541	-0.11241
0.15365	-0.22519								0.15438	-0.11253
0.15393	-0.22506								0.15466	-0.11249
0.15421	-0.22493								0.15494	-0.11239
0.15449	-0.2247								0.15521	-0.11256
0.15476	-0.22462								0.15549	-0.11243
0.15504	-0.22453								0.15577	-0.11239
0.15532	-0.22435								0.15605	-0.11247
0.1556	-0.22411								0.15633	-0.11253
0.15587	-0.22409								0.1566	-0.11235
0.15615	-0.2239								0.15688	-0.11237
0.15643	-0.22376								0.15716	-0.11233
0.15671	-0.22357								0.15744	-0.11249
0.15699	-0.22344								0.15771	-0.11256
0.15726	-0.22323								0.15799	-0.11241
0.15754	-0.22304								0.15827	-0.11241
0.15782	-0.22285								0.15855	-0.11249
0.1581	-0.22294								0.15883	-0.11249
0.15837	-0.22269								0.1591	-0.11239
0.15865	-0.22246								0.15938	-0.11241
0.15893	-0.22248								0.15966	-0.11245
0.15921	-0.22241								0.15994	-0.11237
0.15949	-0.22214								0.16021	-0.11243
0.15976	-0.22208								0.16049	-0.11241
0.16004	-0.22174								0.16077	-0.11254
0.16032	-0.2217								0.16105	-0.11247
0.1606	-0.22149								0.16133	-0.11256
0.16087	-0.22142								0.1616	-0.11241
0.16115	-0.22113								0.16188	-0.11245
0.16143	-0.22098								0.16216	-0.11253
0.16171	-0.22073								0.16244	-0.11239
0.16199	-0.22075								0.16271	-0.11249
0.16226	-0.22063								0.16299	-0.11241
0.16254	-0.2204								0.16327	-0.11245
0.16282	-0.22033								0.16355	-0.11258
0.1631	-0.22019								0.16383	-0.11241
0.16337	-0.21987								0.1641	-0.11253
0.16365	-0.21991								0.16438	-0.11251
0.16393	-0.21974								0.16466	-0.11235
0.16421	-0.21956								0.16494	-0.11245
0.16449	-0.21939								0.16521	-0.11237
0.16476	-0.21928								0.16549	-0.11253
0.16504	-0.21928								0.16577	-0.11243
0.16532	-0.21911								0.16605	-0.11247
0.1656	-0.21897								0.16633	-0.11258
0.16587	-0.2188								0.1666	-0.11245
0.16615	-0.21857								0.16688	-0.11253
0.16643	-0.21838								0.16716	-0.11243
0.16671	-0.21819								0.16744	-0.11256
0.16699	-0.21821								0.16771	-0.11245
0.16726	-0.218								0.16799	-0.11233
0.16754	-0.21798								0.16827	-0.11251
0.16782	-0.21781								0.16855	-0.11256
0.1681	-0.21766								0.16883	-0.11247
0.16837	-0.21743								0.1691	-0.11253
0.16865	-0.21729								0.16938	-0.11249
0.16893	-0.2172								0.16966	-0.11233
0.16921	-0.21695								0.16994	-0.11228
0.16949	-0.21689								0.17021	-0.1126
0.16976	-0.21687								0.17049	-0.11258
0.17004	-0.21647								0.17077	-0.11245
0.17032	-0.2163								0.17105	-0.1126
0.1706	-0.21624								0.17133	-0.11237
0.17087	-0.21623								0.1716	-0.11235
0.17115	-0.21609								0.17188	-0.11254
0.17143	-0.21582								0.17216	-0.11243
0.17171	-0.21562								0.17244	-0.11239
0.17199	-0.21558								0.17271	-0.11235
0.17226	-0.21556								0.17299	-0.11249
0.17254	-0.21525								0.17327	-0.1126
0.17282	-0.21514								0.17355	-0.11258
0.1731	-0.21502								0.17383	-0.11253
0.17337	-0.21489								0.1741	-0.11245
0.17365	-0.21478								0.17438	-0.11237
0.17393	-0.21462								0.17466	-0.11249
0.17421	-0.21455								0.17494	-0.11243
0.17449	-0.21432								0.17521	-0.11241
0.17476	-0.21413								0.17549	-0.11233
0.17504	-0.21405								0.17577	-0.11258
0.17532	-0.21396								0.17605	-0.11239
0.1756	-0.21388								0.17633	-0.11233
0.17587	-0.21359								0.1766	-0.11247
0.17615	-0.21352								0.17688	-0.11232
0.17643	-0.21352								0.17716	-0.11237
0.17671	-0.21331								0.17744	-0.11228
0.17699	-0.2131								0.17771	-0.1123
0.17726	-0.21279								0.17799	-0.11251
0.17754	-0.21283								0.17827	-0.11243
0.17782	-0.21285								0.17855	-0.1123
0.1781	-0.21249								0.17883	-0.11237
0.17837	-0.21237								0.1791	-0.11239
0.17865	-0.21228								0.17938	-0.11241
0.17893	-0.21207								0.17966	-0.11239
0.17921	-0.21189								0.17994	-0.11232
0.17949	-0.21176								0.18021	-0.11247
0.17976	-0.21172								0.18049	-0.11232
0.18004	-0.21153								0.18077	-0.11228
0.18032	-0.21146								0.18105	-0.11247
0.1806	-0.21136								0.18133	-0.1122
0.18087	-0.21125								0.1816	-0.11243
0.18115	-0.21102								0.18188	-0.11235
0.18143	-0.21092								0.18216	-0.11216
0.18171	-0.21071								0.18244	-0.1123
0.18199	-0.2106								0.18271	-0.11224
0.18226	-0.21056								0.18299	-0.11216
0.18254	-0.21031								0.18327	-0.11218
0.18282	-0.21012								0.18355	-0.11222
0.1831	-0.21022								0.18383	-0.11224
0.18337	-0.20983								0.1841	-0.11228
0.18365	-0.20985								0.18438	-0.11216
0.18393	-0.20953								0.18466	-0.11243
0.18421	-0.20949								0.18494	-0.1122
0.18449	-0.20949								0.18521	-0.11213
0.18476	-0.20924								0.18549	-0.11224
0.18504	-0.20909								0.18577	-0.11216
0.18532	-0.20892								0.18605	-0.11205
0.1856	-0.20886								0.18633	-0.11218
0.18587	-0.20863								0.1866	-0.11207
0.18615	-0.20863								0.18688	-0.11211
0.18643	-0.2084								0.18716	-0.11213
0.18671	-0.20821								0.18744	-0.11207
0.18699	-0.20808								0.18771	-0.11213
0.18726	-0.20802								0.18799	-0.11222
0.18754	-0.20785								0.18827	-0.11209
0.18782	-0.20783								0.18855	-0.11209
0.1881	-0.20768								0.18883	-0.11211
0.18837	-0.20754								0.1891	-0.11209
0.18865	-0.20739								0.18938	-0.11207
0.18893	-0.20739								0.18966	-0.11195
0.18921	-0.20712								0.18994	-0.11199
0.18949	-0.20703								0.19021	-0.11209
0.18976	-0.2068								0.19049	-0.11192
0.19004	-0.20669								0.19077	-0.11201
0.19032	-0.20667								0.19105	-0.11205
0.1906	-0.20648								0.19133	-0.1119
0.19087	-0.20636								0.1916	-0.11195
0.19115	-0.20606								0.19188	-0.11192
0.19143	-0.20592								0.19216	-0.11193
0.19171	-0.20585								0.19244	-0.11192
0.19199	-0.20569								0.19271	-0.11184
0.19226	-0.20566								0.19299	-0.11186
0.19254	-0.20556								0.19327	-0.11174
0.19282	-0.20535								0.19355	-0.11174
0.1931	-0.20522								0.19383	-0.11188
0.19337	-0.20506								0.1941	-0.11182
0.19365	-0.20508								0.19438	-0.11172
0.19393	-0.20487								0.19466	-0.11184
0.19421	-0.20468								0.19494	-0.11178
0.19449	-0.20457								0.19521	-0.11151
0.19476	-0.20449								0.19549	-0.11178
0.19504	-0.2044								0.19577	-0.11157
0.19532	-0.2043								0.19605	-0.11174
0.1956	-0.20405								0.19633	-0.11172
0.19587	-0.2039								0.1966	-0.11163
0.19615	-0.20384								0.19688	-0.11171
0.19643	-0.20379								0.19716	-0.11165
0.19671	-0.20361								0.19744	-0.11165
0.19699	-0.20329								0.19771	-0.11159
0.19726	-0.20329								0.19799	-0.11159
0.19754	-0.20327								0.19827	-0.11161
0.19782	-0.20312								0.19855	-0.11178
0.1981	-0.20293								0.19883	-0.11146
0.19837	-0.20277								0.1991	-0.11151
0.19865	-0.20274								0.19938	-0.11157
0.19893	-0.20253								0.19966	-0.11148
0.19921	-0.20249								0.19994	-0.11151
0.19949	-0.20222								0.20021	-0.11142
0.19976	-0.20224								0.20049	-0.11146
0.20004	-0.20199								0.20077	-0.11146
0.20032	-0.2019								0.20105	-0.1114
0.2006	-0.20178								0.20133	-0.1113
0.20087	-0.20178								0.2016	-0.11138
0.20115	-0.20165								0.20188	-0.11138
0.20143	-0.20134								0.20216	-0.11129
0.20171	-0.20111								0.20244	-0.11138
0.20199	-0.20119								0.20271	-0.11129
0.20226	-0.20102								0.20299	-0.11108
0.20254	-0.20087								0.20327	-0.11119
0.20282	-0.20077								0.20355	-0.11111
0.2031	-0.20079								0.20383	-0.11117
0.20337	-0.20045								0.2041	-0.11111
0.20365	-0.20037								0.20438	-0.11108
0.20393	-0.2002								0.20466	-0.11125
0.20421	-0.20016								0.20494	-0.11121
0.20449	-0.20008								0.20521	-0.11092
0.20476	-0.19989								0.20549	-0.11117
0.20504	-0.19966								0.20577	-0.11098
0.20532	-0.19965								0.20605	-0.1109
0.2056	-0.19953								0.20633	-0.1109
0.20587	-0.19932								0.2066	-0.11102
0.20615	-0.19923								0.20688	-0.1106
0.20643	-0.19917								0.20716	-0.11066
0.20671	-0.19892								0.20744	-0.11062
0.20699	-0.19905								0.20771	-0.11064
0.20726	-0.19884								0.20799	-0.11079
0.20754	-0.1986								0.20827	-0.11067
0.20782	-0.1986								0.20855	-0.11069
0.2081	-0.19835								0.20883	-0.11041
0.20837	-0.19825								0.2091	-0.11058
0.20865	-0.19808								0.20938	-0.11048
0.20893	-0.19795								0.20966	-0.11048
0.20921	-0.19795								0.20994	-0.1105
0.20949	-0.19776								0.21021	-0.11037
0.20976	-0.19766								0.21049	-0.11043
0.21004	-0.19764								0.21077	-0.11029
0.21032	-0.19757								0.21105	-0.11039
0.2106	-0.19737								0.21133	-0.11039
0.21087	-0.19718								0.2116	-0.11033
0.21115	-0.19711								0.21188	-0.11022
0.21143	-0.19705								0.21216	-0.11024
0.21171	-0.19692								0.21244	-0.1102
0.21199	-0.19678								0.21271	-0.11027
0.21226	-0.19673								0.21299	-0.11012
0.21254	-0.19657								0.21327	-0.11005
0.21282	-0.19636								0.21355	-0.11003
0.2131	-0.19634								0.21383	-0.11003
0.21337	-0.19636								0.2141	-0.11016
0.21365	-0.1961								0.21438	-0.11016
0.21393	-0.19598								0.21466	-0.1102
0.21421	-0.19592								0.21494	-0.10451
0.21449	-0.19571								0.21521	-0.10564
0.21476	-0.19583								0.21549	-0.10623
0.21504	-0.19562								0.21577	-0.10682
0.21532	-0.19547								0.21605	-0.10728
0.2156	-0.19539								0.21633	-0.10745
0.21587	-0.19528								0.2166	-0.10795
0.21615	-0.19518								0.21688	-0.10806
0.21643	-0.19514								0.21716	-0.10835
0.21671	-0.1948								0.21744	-0.10839
0.21699	-0.19472								0.21771	-0.10854
0.21726	-0.19451								0.21799	-0.1086
0.21754	-0.19449								0.21827	-0.10871
0.21782	-0.19407								0.21855	-0.10892
0.2181	-0.19436								0.21883	-0.10896
0.21837	-0.19421								0.2191	-0.10884
0.21865	-0.194								0.21938	-0.10896
0.21893	-0.19425								0.21966	-0.10894
0.21921	-0.19413								0.21994	-0.10909
0.21949	-0.19398								0.22021	-0.10909
0.21976	-0.19413								0.22049	-0.10921
0.22004	-0.19405								0.22077	-0.10913
0.22032	-0.1939								0.22105	-0.10905
0.2206	-0.19394								0.22133	-0.10915
0.22087	-0.19384								0.2216	-0.1093
0.22115	-0.19358								0.22188	-0.10901
0.22143	-0.19362								0.22216	-0.10911
0.22171	-0.19362								0.22244	-0.10921
0.22199	-0.1935								0.22271	-0.10901
0.22226	-0.1935								0.22299	-0.10911
0.22254	-0.19346								0.22327	-0.10905
0.22282	-0.19333								0.22355	-0.109
0.2231	-0.19322								0.22383	-0.10903
0.22337	-0.19325								0.2241	-0.10898
0.22365	-0.19331								0.22438	-0.10892
0.22393	-0.19304								0.22466	-0.10892
0.22421	-0.19301								0.22494	-0.10881
0.22449	-0.19301								0.22521	-0.10865
0.22476	-0.19281								0.22549	-0.10867
0.22504	-0.19266								0.22577	-0.1085
0.22532	-0.19257								0.22605	-0.10861
0.2256	-0.19257								0.22633	-0.10837
0.22587	-0.19247								0.2266	-0.10844
0.22615	-0.19249								0.22688	-0.10846
0.22643	-0.19222								0.22716	-0.1086
0.22671	-0.19215								0.22744	-0.10881
0.22699	-0.19199								0.22771	-0.10856
0.22726	-0.19207								0.22799	-0.10835
0.22754	-0.19192								0.22827	-0.10846
0.22782	-0.19184								0.22855	-0.10854
0.2281	-0.19182								0.22883	-0.10856
0.22837	-0.19163								0.2291	-0.10846
0.22865	-0.19161								0.22938	-0.10852
0.22893	-0.19163								0.22966	-0.10852
0.22921	-0.19144								0.22994	-0.10829
0.22949	-0.19135								0.23021	-0.10827
0.22976	-0.19136								0.23049	-0.10812
0.23004	-0.19112								0.23077	-0.10829
0.23032	-0.19117								0.23105	-0.10818
0.2306	-0.19106								0.23133	-0.10797
0.23087	-0.19085								0.2316	-0.1081
0.23115	-0.19089								0.23188	-0.10808
0.23143	-0.19072								0.23216	-0.10793
0.23171	-0.19075								0.23244	-0.10785
0.23199	-0.19054								0.23271	-0.10779
0.23226	-0.19041								0.23299	-0.10779
0.23254	-0.19047								0.23327	-0.10772
0.23282	-0.19022								0.23355	-0.10755
0.2331	-0.19016								0.23383	-0.10756
0.23337	-0.19012								0.2341	-0.10753
0.23365	-0.19003								0.23438	-0.10737
0.23393	-0.19001								0.23466	-0.10745
0.23421	-0.18997								0.23494	-0.10758
0.23449	-0.18978								0.23521	-0.10741
0.23476	-0.18959								0.23549	-0.10734
0.23504	-0.18978								0.23577	-0.10741
0.23532	-0.18953								0.23605	-0.10726
0.2356	-0.18957								0.23633	-0.10716
0.23587	-0.18949								0.2366	-0.10739
0.23615	-0.1894								0.23688	-0.10737
0.23643	-0.18927								0.23716	-0.10751
0.23671	-0.18921								0.23744	-0.10756
0.23699	-0.18892								0.23771	-0.10751
0.23726	-0.18904								0.23799	-0.1076
0.23754	-0.18875								0.23827	-0.10756
0.23782	-0.18877								0.23855	-0.10774
0.2381	-0.18867								0.23883	-0.10804
0.23837	-0.18854								0.2391	-0.10797
0.23865	-0.18852								0.23938	-0.1081
0.23893	-0.18841								0.23966	-0.10808
0.23921	-0.18833								0.23994	-0.10808
0.23949	-0.18827								0.24021	-0.10814
0.23976	-0.18803								0.24049	-0.10821
0.24004	-0.18799								0.24077	-0.10812
0.24032	-0.1881								0.24105	-0.10821
0.2406	-0.18787								0.24133	-0.10831
0.24087	-0.18783								0.2416	-0.10806
0.24115	-0.18778								0.24188	-0.1081
0.24143	-0.1878								0.24216	-0.10797
0.24171	-0.18753								0.24244	-0.10819
0.24199	-0.18751								0.24271	-0.1081
0.24226	-0.18745								0.24299	-0.10797
0.24254	-0.18719								0.24327	-0.10785
0.24282	-0.18728								0.24355	-0.10798
0.2431	-0.18724								0.24383	-0.10797
0.24337	-0.18722								0.2441	-0.10783
0.24365	-0.18703								0.24438	-0.10797
0.24393	-0.18694								0.24466	-0.10772
0.24421	-0.18684								0.24494	-0.10766
0.24449	-0.18671								0.24521	-0.10789
0.24476	-0.18661								0.24549	-0.10755
0.24504	-0.18646								0.24577	-0.1077
0.24532	-0.18659								0.24605	-0.10758
0.2456	-0.18638								0.24633	-0.10756
0.24587	-0.18629								0.2466	-0.10753
0.24615	-0.18623								0.24688	-0.10753
0.24643	-0.18614								0.24716	-0.10739
0.24671	-0.18604								0.24744	-0.10745
0.24699	-0.18602								0.24771	-0.10737
0.24726	-0.18602								0.24799	-0.10737
0.24754	-0.18583								0.24827	-0.10732
0.24782	-0.18581								0.24855	-0.10734
0.2481	-0.18564								0.24883	-0.1073
0.24837	-0.18575								0.2491	-0.1072
0.24865	-0.18547								0.24938	-0.10716
0.24893	-0.18553								0.24966	-0.1072
0.24921	-0.18551								0.24994	-0.10713
0.24949	-0.18535								0.25021	-0.10699
0.24976	-0.18537								0.25049	-0.10709
0.25004	-0.18516								0.25077	-0.10703
0.25032	-0.18511								0.25105	-0.1069
0.2506	-0.18518								0.25133	-0.10703
0.25087	-0.18492								0.2516	-0.10684
0.25115	-0.18482								0.25188	-0.10684
0.25143	-0.18474								0.25216	-0.10663
0.25171	-0.18467								0.25244	-0.10667
0.25199	-0.18463								0.25271	-0.10678
0.25226	-0.18448								0.25299	-0.10676
0.25254	-0.1845								0.25327	-0.1068
0.25282	-0.18434								0.25355	-0.10657
0.2531	-0.18436								0.25383	-0.10648
0.25337	-0.18425								0.2541	-0.10655
0.25365	-0.18427								0.25438	-0.10634
0.25393	-0.18417								0.25466	-0.10642
0.25421	-0.18394								0.25494	-0.10629
0.25449	-0.18409								0.25521	-0.10619
0.25476	-0.18385								0.25549	-0.10625
0.25504	-0.18379								0.25577	-0.10615
0.25532	-0.18369								0.25605	-0.10615
0.2556	-0.18362								0.25633	-0.10617
0.25587	-0.18356								0.2566	-0.10598
0.25615	-0.18352								0.25688	-0.10606
0.25643	-0.18343								0.25716	-0.106
0.25671	-0.18327								0.25744	-0.10592
0.25699	-0.18337								0.25771	-0.10592
0.25726	-0.18305								0.25799	-0.10596
0.25754	-0.18316								0.25827	-0.10571
0.25782	-0.18305								0.25855	-0.10573
0.2581	-0.18291								0.25883	-0.10583
0.25837	-0.18295								0.2591	-0.10568
0.25865	-0.18301								0.25938	-0.1056
0.25893	-0.18291								0.25966	-0.1056
0.25921	-0.18274								0.25994	-0.10552
0.25949	-0.18251								0.26021	-0.10547
0.25976	-0.18253								0.26049	-0.10541
0.26004	-0.18247								0.26077	-0.10537
0.26032	-0.18243								0.26105	-0.10535
0.2606	-0.1824								0.26133	-0.10526
0.26087	-0.1823								0.2616	-0.10518
0.26115	-0.18232								0.26188	-0.10512
0.26143	-0.18217								0.26216	-0.10526
0.26171	-0.18192								0.26244	-0.10516
0.26199	-0.18203								0.26271	-0.10491
0.26226	-0.182								0.26299	-0.1051
0.26254	-0.18188								0.26327	-0.10489
0.26282	-0.18186								0.26355	-0.10489
0.2631	-0.18167								0.26383	-0.10508
0.26337	-0.18156								0.2641	-0.10484
0.26365	-0.18152								0.26438	-0.10484
0.26393	-0.18161								0.26466	-0.10468
0.26421	-0.18142								0.26494	-0.10486
0.26449	-0.18139								0.26521	-0.1048
0.26476	-0.18133								0.26549	-0.10457
0.26504	-0.18119								0.26577	-0.10455
0.26532	-0.18118								0.26605	-0.10459
0.2656	-0.18114								0.26633	-0.10449
0.26587	-0.18106								0.2666	-0.10449
0.26615	-0.18106								0.26688	-0.10417
0.26643	-0.18087								0.26716	-0.10421
0.26671	-0.18079								0.26744	-0.10426
0.26699	-0.18064								0.26771	-0.10432
0.26726	-0.18062								0.26799	-0.10413
0.26754	-0.1806								0.26827	-0.10415
0.26782	-0.18058								0.26855	-0.10415
0.2681	-0.18037								0.26883	-0.10407
0.26837	-0.18036								0.2691	-0.10394
0.26865	-0.18047								0.26938	-0.10396
0.26893	-0.18034								0.26966	-0.10388
0.26921	-0.18013								0.26994	-0.10381
0.26949	-0.18024								0.27021	-0.10396
0.26976	-0.18009								0.27049	-0.10375
0.27004	-0.17997								0.27077	-0.10371
0.27032	-0.18007								0.27105	-0.10362
0.2706	-0.1799								0.27133	-0.10375
0.27087	-0.17982								0.2716	-0.10362
0.27115	-0.17971								0.27188	-0.10369
0.27143	-0.17971								0.27216	-0.10354
0.27171	-0.17963								0.27244	-0.10344
0.27199	-0.17959								0.27271	-0.10327
0.27226	-0.1795								0.27299	-0.10327
0.27254	-0.1794								0.27327	-0.10339
0.27282	-0.17944								0.27355	-0.10323
0.2731	-0.1794								0.27383	-0.10312
0.27337	-0.17931								0.2741	-0.10316
0.27365	-0.17929								0.27438	-0.10323
0.27393	-0.17919								0.27466	-0.10304
0.27421	-0.17799								0.27494	-0.10175
0.27421	0.14377								0.27494	0.56961
0.27421	0.36253								0.27494	0.90539
0.27421	0.57184								0.27494	1.13632
0.27421	0.77252								0.27494	1.34074
0.27422	0.97273								0.27494	1.54333
0.27424	1.17276								0.27495	1.74375
0.27427	1.37285								0.27496	1.94384
0.2743	1.57297								0.27497	2.14493
0.27432	1.77336								0.27498	2.34591
0.27434	1.97344								0.27499	2.54627
0.27436	2.17368								0.27499	2.74748
0.27438	2.37407								0.275	2.94861
0.27441	2.57433								0.27501	3.14902
0.27445	2.77458								0.27502	3.34936
0.27452	2.97484								0.27504	3.54957
0.27479	2.99175								0.27509	3.74974
0.27507	2.93126								0.27531	3.54967
0.27535	2.89976								0.27559	3.39332
0.27563	2.88352								0.27586	3.33713
0.2759	2.87377								0.27614	3.30918
0.27618	2.86731								0.27642	3.29476
0.27646	2.8624								0.2767	3.28894
0.27674	2.85851								0.27697	3.28848
0.27702	2.85651								0.27725	3.29581
0.27729	2.85508								0.27753	3.31055
0.27757	2.85469								0.27781	3.33042
0.27785	2.85552								0.27809	3.35411
0.27813	2.85683								0.27836	3.37407
0.2784	2.85954								0.27864	3.38575
0.27868	2.86343								0.27892	3.39785
0.27896	2.86902								0.2792	3.41067
0.27924	2.87631								0.27947	3.41685
0.27952	2.88566								0.27975	3.42969
0.27979	2.89682								0.28003	3.43868
0.28007	2.9098								0.28031	3.44558
0.28035	2.92407								0.28059	3.45612
0.28063	2.93216								0.28086	3.46121
0.2809	2.94193								0.28114	3.45222
0.28118	2.94996								0.28142	3.46438
0.28146	2.95504								0.2817	3.46871
0.28174	2.95862								0.28197	3.46463
0.28202	2.96135								0.28225	3.47188
0.28229	2.96664								0.28253	3.47707
0.28257	2.96778								0.28281	3.4718
0.28285	2.96923								0.28309	3.47708
0.28313	2.97133								0.28336	3.48292
0.2834	2.97309								0.28364	3.4756
0.28368	2.97499								0.28392	3.48357
0.28396	2.97728								0.2842	3.48441
0.28424	2.97744								0.28447	3.4788
0.28452	2.97961								0.28475	3.48832
0.28479	2.98438								0.28503	3.49073
0.28507	2.98459								0.28531	3.48039
0.28535	2.99125								0.28559	3.49485
0.28563	2.99428								0.28586	3.49206
0.2859	2.98887								0.28614	3.48397
0.28618	2.99175								0.28642	3.49723
0.28646	2.9969								0.2867	3.49122
0.28674	2.99596								0.28697	3.49367
0.28702	2.99949								0.28725	3.4999
0.28729	3.0002								0.28753	3.50244
0.28757	2.99535								0.28781	3.49382
0.28785	3.00083								0.28809	3.50244
0.28813	3.00224								0.28836	3.5045
0.2884	2.99814								0.28864	3.49794
0.28868	3.00482								0.28892	3.50311
0.28896	3.00505								0.2892	3.50319
0.28924	3.00087								0.28947	3.49744
0.28952	3.00869								0.28975	3.50206
0.28979	3.00814								0.29003	3.50782
0.29007	3.00358								0.29031	3.49874
0.29035	3.0065								0.29059	3.50487
0.29063	3.0101								0.29086	3.5113
0.2909	3.00354								0.29114	3.49718
0.29118	3.00999								0.29142	3.51032
0.29146	3.01003								0.2917	3.50815
0.29174	3.00659								0.29197	3.50628
0.29202	3.01136								0.29225	3.5078
0.29229	3.0131								0.29253	3.5095
0.29257	3.00886								0.29281	3.50597
0.29285	3.01287								0.29309	3.51557
0.29313	3.01554								0.29336	3.51355
0.2934	3.00882								0.29364	3.50794
0.29368	3.01651								0.29392	3.51477
0.29396	3.01752								0.2942	3.51214
0.29424	3.01056								0.29447	3.50733
0.29452	3.0172								0.29475	3.51986
0.29479	3.02006								0.29503	3.51864
0.29507	3.01359								0.29531	3.5099
0.29535	3.01861								0.29559	3.51454
0.29563	3.02231								0.29586	3.51294
0.2959	3.01518								0.29614	3.50971
0.29618	3.01907								0.29642	3.51717
0.29646	3.01976								0.2967	3.52515
0.29674	3.01489								0.29697	3.51364
0.29702	3.02271								0.29725	3.5187
0.29729	3.02432								0.29753	3.51961
0.29757	3.0204								0.29781	3.51185
0.29785	3.02477								0.29809	3.51305
0.29813	3.02527								0.29836	3.51769
0.2984	3.01625								0.29864	3.51002
0.29868	3.02134								0.29892	3.51702
0.29896	3.02338								0.2992	3.51897
0.29924	3.01712								0.29947	3.51376
0.29952	3.02283								0.29975	3.52246
0.29979	3.02468								0.30003	3.51759
0.30007	3.0197								0.30031	3.51637
0.30035	3.02458								0.30059	3.51708
0.30063	3.03052								0.30086	3.52028
0.3009	3.02201								0.30114	3.51622
0.30118	3.02458								0.30142	3.52021
0.30146	3.02764								0.3017	3.52393
0.30174	3.02414								0.30197	3.51595
0.30202	3.02754								0.30225	3.52192
0.30229	3.03185								0.30253	3.52253
0.30257	3.02437								0.30281	3.51563
0.30285	3.02439								0.30309	3.51652
0.30313	3.02724								0.30336	3.51893
0.3034	3.02342								0.30364	3.51584
0.30368	3.02456								0.30392	3.52437
0.30396	3.02903								0.3042	3.52074
0.30424	3.02441								0.30447	3.52162
0.30452	3.02808								0.30475	3.52526
0.30479	3.02977								0.30503	3.5224
0.30507	3.02441								0.30531	3.51719
0.30535	3.02876								0.30559	3.51845
0.30563	3.03157								0.30586	3.52177
0.3059	3.0251								0.30614	3.51637
0.30618	3.02953								0.30642	3.52694
0.30646	3.03321								0.3067	3.51956
0.30674	3.02514								0.30697	3.52721
0.30702	3.02626								0.30725	3.53087
0.30729	3.03202								0.30753	3.52282
0.30757	3.02743								0.30781	3.52484
0.30785	3.02758								0.30809	3.52791
0.30813	3.0305								0.30836	3.53677
0.3084	3.02722								0.30864	3.52402
0.30868	3.03075								0.30892	3.53085
0.30896	3.03048								0.3092	3.5273
0.30924	3.02869								0.30947	3.52209
0.30952	3.02954								0.30975	3.52519
0.30979	3.03187								0.31003	3.52866
0.31007	3.02575								0.31031	3.52385
0.31035	3.03174								0.31059	3.53249
0.31063	3.03334								0.31086	3.52011
0.3109	3.02884								0.31114	3.52438
0.31118	3.03118								0.31142	3.52744
0.31146	3.03498								0.3117	3.52486
0.31174	3.02895								0.31197	3.52721
0.31202	3.03321								0.31225	3.53221
0.31229	3.03479								0.31253	3.53299
0.31257	3.02838								0.31281	3.52377
0.31285	3.03202								0.31309	3.52938
0.31313	3.03418								0.31336	3.52259
0.3134	3.03128								0.31364	3.52791
0.31368	3.03512								0.31392	3.53486
0.31396	3.03534								0.3142	3.53013
0.31424	3.03159								0.31447	3.5327
0.31452	3.03603								0.31475	3.53112
0.31479	3.0347								0.31503	3.53125
0.31507	3.03162								0.31531	3.52583
0.31535	3.03321								0.31559	3.53646
0.31563	3.03475								0.31586	3.53064
0.3159	3.03218								0.31614	3.52465
0.31618	3.0358								0.31642	3.5312
0.31646	3.03624								0.3167	3.53419
0.31674	3.03334								0.31697	3.53034
0.31702	3.03309								0.31725	3.53597
0.31729	3.03353								0.31753	3.53459
0.31757	3.03178								0.31781	3.52597
0.31785	3.03498								0.31809	3.53557
0.31813	3.03431								0.31836	3.53118
0.3184	3.03025								0.31864	3.53553
0.31868	3.03658								0.31892	3.53509
0.31896	3.03716								0.3192	3.53104
0.31924	3.02884								0.31947	3.5356
0.31952	3.03273								0.31975	3.53482
0.31979	3.03428								0.32003	3.53081
0.32007	3.03033								0.32031	3.53039
0.32035	3.03214								0.32059	3.53898
0.32063	3.03456								0.32086	3.53461
0.3209	3.03281								0.32114	3.53276
0.32118	3.03374								0.32142	3.536
0.32146	3.0358								0.3217	3.52946
0.32174	3.0346								0.32197	3.52839
0.32202	3.03773								0.32225	3.54009
0.32229	3.03916								0.32253	3.53383
0.32257	3.0372								0.32281	3.53728
0.32285	3.03952								0.32309	3.53688
0.32313	3.03815								0.32336	3.53971
0.3234	3.03359								0.32364	3.54051
0.32368	3.03927								0.32392	3.53906
0.32396	3.03903								0.3242	3.53265
0.32424	3.03109								0.32447	3.53572
0.32452	3.03429								0.32475	3.54427
0.32479	3.03559								0.32503	3.53349
0.32507	3.03296								0.32531	3.53764
0.32535	3.03788								0.32559	3.53637
0.32563	3.03624								0.32586	3.53291
0.3259	3.03548								0.32614	3.53608
0.32618	3.04113								0.32642	3.53789
0.32646	3.03773								0.3267	3.53681
0.32674	3.03435								0.32697	3.53784
0.32702	3.03941								0.32725	3.54539
0.32729	3.03866								0.32753	3.53745
0.32757	3.03388								0.32781	3.53202
0.32785	3.04032								0.32809	3.54049
0.32813	3.04172								0.32836	3.53732
0.3284	3.03685								0.32864	3.54098
0.32868	3.03905								0.32892	3.5415
0.32896	3.04156								0.3292	3.53461
0.32924	3.03788								0.32947	3.53412
0.32952	3.03895								0.32975	3.53799
0.32979	3.03855								0.33003	3.53654
0.33007	3.03689								0.33031	3.54076
0.33035	3.04095								0.33059	3.54925
0.33063	3.03857								0.33086	3.53847
0.3309	3.03527								0.33114	3.53883
0.33118	3.03798								0.33142	3.54369
0.33146	3.04225								0.3317	3.53763
0.33174	3.03926								0.33197	3.54411
0.33202	3.04481								0.33225	3.539
0.33229	3.04071								0.33253	3.5378
0.33257	3.03876								0.33281	3.54076
0.33285	3.03952								0.33309	3.54776
0.33313	3.03769								0.33336	3.5403
0.3334	3.03481								0.33364	3.54413
0.33368	3.03939								0.33392	3.54451
0.33396	3.04027								0.3342	3.54472
0.33424	3.03853								0.33447	3.54812
0.33452	3.03809								0.33475	3.5494
0.33479	3.03699								0.33503	3.54663
0.33507	3.03439								0.33531	3.54388
0.33535	3.03878								0.33559	3.55239
0.33563	3.03658								0.33586	3.53885
0.3359	3.0376								0.33614	3.5418
0.33618	3.04063								0.33642	3.54764
0.33646	3.03905								0.3367	3.54327
0.33674	3.03874								0.33697	3.54652
0.33702	3.03996								0.33725	3.54516
0.33729	3.03573								0.33753	3.54179
0.33757	3.0354								0.33781	3.54974
0.33785	3.03948								0.33809	3.54978
0.33813	3.04027								0.33836	3.54131
0.3384	3.03866								0.33864	3.54739
0.33868	3.04271								0.33892	3.54654
0.33896	3.03998								0.3392	3.54989
0.33924	3.03842								0.33947	3.54461
0.33952	3.03868								0.33975	3.54801
0.33979	3.03695								0.34003	3.54053
0.34007	3.03782								0.34031	3.55129
0.34035	3.04218								0.34059	3.54829
0.34063	3.04								0.34086	3.54304
0.3409	3.04061								0.34114	3.54743
0.34118	3.04267								0.34142	3.54953
0.34146	3.04134								0.3417	3.5477
0.34174	3.03878								0.34197	3.5501
0.34202	3.04221								0.34225	3.55009
0.34229	3.04067								0.34253	3.54816
0.34257	3.03954								0.34281	3.56031
0.34285	3.04206								0.34309	3.55035
0.34313	3.03624								0.34336	3.54449
0.3434	3.03693								0.34364	3.54892
0.34368	3.0399								0.34392	3.55304
0.34396	3.04275								0.3442	3.54551
0.34424	3.04019								0.34447	3.55186
0.34452	3.04338								0.34475	3.55163
0.34479	3.0399								0.34503	3.54635
0.34507	3.03658								0.34531	3.55367
0.34535	3.04176								0.34559	3.5505
0.34563	3.0409								0.34586	3.55203
0.3459	3.04099								0.34614	3.55119
0.34618	3.04557								0.34642	3.55506
0.34646	3.04206								0.3467	3.54978
0.34674	3.04065								0.34697	3.54972
0.34702	3.04651								0.34725	3.55031
0.34729	3.04124								0.34753	3.54675
0.34757	3.03718								0.34781	3.55554
0.34785	3.0429								0.34809	3.55293
0.34813	3.03977								0.34836	3.54762
0.3484	3.04065								0.34864	3.55566
0.34868	3.04414								0.34892	3.55724
0.34896	3.04328								0.3492	3.54797
0.34924	3.04118								0.34947	3.55215
0.34952	3.04487								0.34975	3.5556
0.34979	3.04351								0.35003	3.54467
0.35007	3.04088								0.35031	3.55236
0.35035	3.04572								0.35059	3.5527
0.35063	3.04143								0.35086	3.54739
0.3509	3.03857								0.35114	3.55245
0.35118	3.04467								0.35142	3.55236
0.35146	3.04044								0.3517	3.54339
0.35174	3.04259								0.35197	3.55493
0.35202	3.0458								0.35225	3.56211
0.35229	3.04298								0.35253	3.55325
0.35257	3.0425								0.35281	3.55434
0.35285	3.04618								0.35309	3.56071
0.35313	3.04349								0.35336	3.55428
0.3534	3.04662								0.35364	3.55329
0.35368	3.04899								0.35392	3.55926
0.35396	3.04794								0.3542	3.55234
0.35424	3.04752								0.35447	3.55961
0.35452	3.047								0.35475	3.55512
0.35479	3.04681								0.35503	3.55539
0.35507	3.04731								0.35531	3.55539
0.35535	3.04672								0.35559	3.5561
0.35563	3.04508								0.35586	3.55596
0.3559	3.04233								0.35614	3.56464
0.35618	3.04677								0.35642	3.56235
0.35646	3.04403								0.3567	3.55211
0.35674	3.04466								0.35697	3.55579
0.35702	3.04607								0.35725	3.55476
0.35729	3.04383								0.35753	3.55321
0.35757	3.04156								0.35781	3.56239
0.35785	3.04704								0.35809	3.56466
0.35813	3.04311								0.35836	3.55755
0.3584	3.04416								0.35864	3.55957
0.35868	3.04597								0.35892	3.55915
0.35896	3.04233								0.3592	3.55071
0.35924	3.04254								0.35947	3.56157
0.35952	3.04618								0.35975	3.55403
0.35979	3.04534								0.36003	3.55144
0.36007	3.04723								0.36031	3.5569
0.36035	3.05								0.36059	3.55655
0.36063	3.04574								0.36086	3.55329
0.3609	3.04807								0.36114	3.55777
0.36118	3.05046								0.36142	3.55403
0.36146	3.04675								0.3617	3.55131
0.36174	3.04504								0.36197	3.55695
0.36202	3.04695								0.36225	3.55234
0.36229	3.04437								0.36253	3.5543
0.36257	3.04538								0.36281	3.55753
0.36285	3.04944								0.36309	3.55867
0.36313	3.04883								0.36336	3.55199
0.3634	3.04702								0.36364	3.55703
0.36368	3.04847								0.36392	3.56258
0.36396	3.04645								0.3642	3.55756
0.36424	3.04595								0.36447	3.56113
0.36452	3.05028								0.36475	3.57012
0.36479	3.04723								0.36503	3.55585
0.36507	3.04523								0.36531	3.5581
0.36535	3.04832								0.36559	3.56212
0.36563	3.04446								0.36586	3.55602
0.3659	3.04324								0.36614	3.55888
0.36618	3.04731								0.36642	3.56628
0.36646	3.04658								0.3667	3.55739
0.36674	3.0458								0.36697	3.55804
0.36702	3.04923								0.36725	3.55497
0.36729	3.04681								0.36753	3.55749
0.36757	3.04599								0.36781	3.56005
0.36785	3.04862								0.36809	3.56348
0.36813	3.04527								0.36836	3.55898
0.3684	3.04569								0.36864	3.56329
0.36868	3.04759								0.36892	3.56342
0.36896	3.04689								0.3692	3.55426
0.36924	3.04746								0.36947	3.55793
0.36952	3.05116								0.36975	3.56333
0.36979	3.04824								0.37003	3.55236
0.37007	3.04483								0.37031	3.55823
0.37035	3.05032								0.37059	3.56348
0.37063	3.04706								0.37086	3.55321
0.3709	3.04738								0.37114	3.55882
0.37118	3.05124								0.37142	3.56344
0.37146	3.04611								0.3717	3.55882
0.37174	3.04698								0.37197	3.56106
0.37202	3.04973								0.37225	3.57006
0.37229	3.04855								0.37253	3.55466
0.37257	3.04651								0.37281	3.56245
0.37285	3.04927								0.37309	3.5659
0.37313	3.04582								0.37336	3.55848
0.3734	3.04477								0.37364	3.56502
0.37368	3.04906								0.37392	3.56338
0.37396	3.04582								0.3742	3.55938
0.37424	3.0458								0.37447	3.56289
0.37452	3.05057								0.37475	3.56701
0.37479	3.04569								0.37503	3.55982
0.37507	3.04819								0.37531	3.5626
0.37535	3.05076								0.37559	3.56972
0.37563	3.04979								0.37586	3.55957
0.3759	3.04901								0.37614	3.56052
0.37618	3.05181								0.37642	3.56419
0.37646	3.04899								0.3767	3.56314
0.37674	3.04918								0.37697	3.56636
0.37702	3.05015								0.37725	3.57065
0.37729	3.04775								0.37753	3.56268
0.37757	3.04819								0.37781	3.56768
0.37785	3.05049								0.37809	3.56399
0.37813	3.04868								0.37836	3.56186
0.3784	3.05101								0.37864	3.56955
0.37868	3.05206								0.37892	3.57527
0.37896	3.04872								0.3792	3.56031
0.37924	3.05047								0.37947	3.56445
0.37952	3.05355								0.37975	3.57006
0.37979	3.04983								0.38003	3.55701
0.38007	3.05297								0.38031	3.56766
0.38035	3.05456								0.38059	3.57182
0.38063	3.04899								0.38086	3.55869
0.3809	3.04899								0.38114	3.56693
0.38118	3.05212								0.38142	3.57079
0.38146	3.05084								0.3817	3.56083
0.38174	3.05131								0.38197	3.56798
0.38202	3.05063								0.38225	3.57166
0.38229	3.05173								0.38253	3.5738
0.38257	3.05101								0.38281	3.56903
0.38285	3.05425								0.38309	3.57
0.38313	3.05509								0.38336	3.56012
0.3834	3.05774								0.38364	3.56621
0.38368	3.06246								0.38392	3.56783
0.38396	3.05763								0.3842	3.56651
0.38424	3.06206								0.38447	3.56613
0.38452	3.05958								0.38475	3.56863
0.38479	3.059								0.38503	3.559
0.38507	3.05503								0.38531	3.56212
0.38535	3.05315								0.38559	3.57397
0.38563	3.05364								0.38586	3.56495
0.3859	3.04977								0.38614	3.5726
0.38618	3.05021								0.38642	3.56447
0.38646	3.05828								0.3867	3.56407
0.38674	3.07784								0.38697	3.56434
0.38702	3.06809								0.38725	3.5742
0.38729	3.04889								0.38753	3.56125
0.38757	3.05128								0.38781	3.57084
0.38785	3.05275								0.38809	3.57256
0.38813	3.05231								0.38836	3.56098
0.3884	3.05183								0.38864	3.56619
0.38868	3.05338								0.38892	3.57588
0.38896	3.05231								0.3892	3.56522
0.38924	3.05095								0.38947	3.57042
0.38952	3.05								0.38975	3.57434
0.38979	3.05068								0.39003	3.56556
0.39007	3.0513								0.39031	3.56833
0.39035	3.05227								0.39059	3.5756
0.39063	3.052								0.39086	3.55949
0.3909	3.05244								0.39114	3.57033
0.39118	3.05671								0.39142	3.57489
0.39146	3.05452								0.3917	3.56604
0.39174	3.05303								0.39197	3.57231
0.39202	3.05091								0.39225	3.57956
0.39229	3.05028								0.39253	3.56241
0.39257	3.05515								0.39281	3.57182
0.39285	3.057								0.39309	3.57441
0.39313	3.0545								0.39336	3.56581
0.3934	3.05681								0.39364	3.57355
0.39368	3.05647								0.39392	3.57825
0.39396	3.05345								0.3942	3.56453
0.39424	3.05523								0.39447	3.57233
0.39452	3.05837								0.39475	3.57693
0.39479	3.05652								0.39503	3.56399
0.39507	3.05803								0.39531	3.56741
0.39535	3.05799								0.39559	3.57626
0.39563	3.05681								0.39586	3.56823
0.3959	3.05719								0.39614	3.57439
0.39618	3.05912								0.39642	3.58073
0.39646	3.05601								0.3967	3.56668
0.39674	3.05948								0.39697	3.57023
0.39702	3.0612								0.39725	3.58023
0.39729	3.0554								0.39753	3.56224
0.39757	3.05305								0.39781	3.56579
0.39785	3.05753								0.39809	3.57653
0.39813	3.05618								0.39836	3.57161
0.3984	3.05605								0.39864	3.56976
0.39868	3.05662								0.39892	3.58
0.39896	3.0536								0.3992	3.56682
0.39924	3.0587								0.39947	3.57193
0.39952	3.05898								0.39975	3.5784
0.39979	3.05511								0.40003	3.56689
0.40007	3.05692								0.40031	3.57268
0.40035	3.05994								0.40059	3.57798
0.40063	3.05505								0.40086	3.56905
0.4009	3.05742								0.40114	3.57407
0.40118	3.05816								0.40142	3.58212
0.40146	3.05742								0.4017	3.56625
0.40174	3.05624								0.40197	3.57027
0.40202	3.05708								0.40225	3.57567
0.40229	3.05318								0.40253	3.56743
0.40257	3.05689								0.40281	3.56978
0.40285	3.05677								0.40309	3.57741
0.40313	3.05286								0.40336	3.5671
0.4034	3.0571								0.40364	3.56688
0.40368	3.05767								0.40392	3.5731
0.40396	3.05603								0.4042	3.56453
0.40424	3.05648								0.40447	3.57088
0.40452	3.06381								0.40475	3.57974
0.40479	3.05288								0.40503	3.56495
0.40507	3.05376								0.40531	3.57187
0.40535	3.05711								0.40559	3.58109
0.40563	3.05551								0.40586	3.56323
0.4059	3.05851								0.40614	3.56934
0.40618	3.05853								0.40642	3.57874
0.40646	3.05507								0.4067	3.57056
0.40674	3.05624								0.40697	3.5685
0.40702	3.0596								0.40725	3.58889
0.40729	3.05862								0.40753	3.56588
0.40757	3.05723								0.40781	3.57439
0.40785	3.059								0.40809	3.58269
0.40813	3.05595								0.40836	3.56762
0.4084	3.05725								0.40864	3.57285
0.40868	3.06183								0.40892	3.58733
0.40896	3.0566								0.4092	3.56783
0.40924	3.05849								0.40947	3.56938
0.40952	3.05935								0.40975	3.57876
0.40979	3.0562								0.41003	3.5713
0.41007	3.05521								0.41031	3.57155
0.41035	3.05933								0.41059	3.57739
0.41063	3.05708								0.41086	3.56731
0.4109	3.05513								0.41114	3.57186
0.41118	3.05944								0.41142	3.57311
0.41146	3.0571								0.4117	3.56108
0.41174	3.06059								0.41197	3.56726
0.41202	3.06301								0.41225	3.57937
0.41229	3.05784								0.41253	3.56804
0.41257	3.06116								0.41281	3.57092
0.41285	3.06196								0.41309	3.58403
0.41313	3.05643								0.41336	3.57098
0.4134	3.05511								0.41364	3.56955
0.41368	3.05746								0.41392	3.58254
0.41396	3.05544								0.4142	3.5727
0.41424	3.06055								0.41447	3.57918
0.41452	3.06181								0.41475	3.57964
0.41479	3.05788								0.41503	3.57262
0.41507	3.0583								0.41531	3.57292
0.41535	3.05828								0.41559	3.5862
0.41563	3.05732								0.41586	3.57075
0.4159	3.06152								0.41614	3.57518
0.41618	3.06097								0.41642	3.58311
0.41646	3.0578								0.4167	3.57271
0.41674	3.05998								0.41697	3.57493
0.41702	3.06387								0.41725	3.58302
0.41729	3.0607								0.41753	3.57037
0.41757	3.06108								0.41781	3.57456
0.41785	3.06087								0.41809	3.58098
0.41813	3.06082								0.41836	3.5713
0.4184	3.06408								0.41864	3.5756
0.41868	3.06139								0.41892	3.57695
0.41896	3.05998								0.4192	3.56438
0.41924	3.06213								0.41947	3.57247
0.41952	3.06333								0.41975	3.58113
0.41979	3.06091								0.42003	3.57126
0.42007	3.06183								0.42031	3.57848
0.42035	3.06299								0.42059	3.58306
0.42063	3.06066								0.42086	3.56989
0.4209	3.06093								0.42114	3.58056
0.42118	3.06354								0.42142	3.58372
0.42146	3.06204								0.4217	3.57006
0.42174	3.06429								0.42197	3.5709
0.42202	3.06362								0.42225	3.57991
0.42229	3.05637								0.42253	3.5718
0.42257	3.06185								0.42281	3.58519
0.42285	3.06145								0.42309	3.58506
0.42313	3.05837								0.42336	3.5784
0.4234	3.06253								0.42364	3.57895
0.42368	3.06185								0.42392	3.58973
0.42396	3.05944								0.4242	3.57556
0.42424	3.06391								0.42447	3.57701
0.42452	3.06458								0.42475	3.5879
0.42479	3.06358								0.42503	3.57514
0.42507	3.06423								0.42531	3.58388
0.42535	3.06532								0.42559	3.58657
0.42563	3.06019								0.42586	3.56815
0.4259	3.06416								0.42614	3.57186
0.42618	3.06847								0.42642	3.58145
0.42646	3.06271								0.4267	3.56737
0.42674	3.0669								0.42697	3.57649
0.42702	3.06679								0.42725	3.57933
0.42729	3.0628								0.42753	3.57437
0.42757	3.06723								0.42781	3.57781
0.42785	3.0694								0.42809	3.58428
0.42813	3.06328								0.42836	3.57042
0.4284	3.06255								0.42864	3.57476
0.42868	3.06864								0.42892	3.58105
0.42896	3.06343								0.4292	3.57975
0.42924	3.06549								0.42947	3.57569
0.42952	3.0686								0.42975	3.58853
0.42979	3.06419								0.43003	3.56745
0.43007	3.06404								0.43031	3.57701
0.43035	3.06604								0.43059	3.58073
0.43063	3.06578								0.43086	3.57415
0.4309	3.06734								0.43114	3.57842
0.43118	3.06496								0.43142	3.58317
0.43146	3.06043								0.4317	3.57754
0.43174	3.06372								0.43197	3.57893
0.43202	3.06177								0.43225	3.57974
0.43229	3.05876								0.43253	3.57304
0.43257	3.0629								0.43281	3.57853
0.43285	3.06976								0.43309	3.58473
0.43313	3.06484								0.43336	3.57413
0.4334	3.06578								0.43364	3.5847
0.43368	3.06746								0.43392	3.58399
0.43396	3.06309								0.4342	3.57794
0.43424	3.0625								0.43447	3.58151
0.43452	3.06301								0.43475	3.59099
0.43479	3.06148								0.43503	3.57621
0.43507	3.06307								0.43531	3.58481
0.43535	3.06425								0.43559	3.59103
0.43563	3.06021								0.43586	3.57848
0.4359	3.06232								0.43614	3.57954
0.43618	3.06692								0.43642	3.58449
0.43646	3.06251								0.4367	3.56743
0.43674	3.06541								0.43697	3.57443
0.43702	3.06679								0.43725	3.58363
0.43729	3.06242								0.43753	3.5779
0.43757	3.06583								0.43781	3.58767
0.43785	3.0686								0.43809	3.58576
0.43813	3.06524								0.43836	3.57634
0.4384	3.06826								0.43864	3.58325
0.43868	3.0681								0.43892	3.58996
0.43896	3.06499								0.4392	3.57842
0.43924	3.06814								0.43947	3.57745
0.43952	3.07024								0.43975	3.58407
0.43979	3.06345								0.44003	3.57466
0.44007	3.06797								0.44031	3.58216
0.44035	3.06538								0.44059	3.59162
0.44063	3.06307								0.44086	3.57708
0.4409	3.0636								0.44114	3.58508
0.44118	3.06801								0.44142	3.5867
0.44146	3.06492								0.4417	3.57165
0.44174	3.06679								0.44197	3.58231
0.44202	3.06849								0.44225	3.58162
0.44229	3.06225								0.44253	3.57607
0.44257	3.0678								0.44281	3.57582
0.44285	3.06917								0.44309	3.5871
0.44313	3.06643								0.44336	3.57582
0.4434	3.06587								0.44364	3.58166
0.44368	3.07028								0.44392	3.59017
0.44396	3.06395								0.4442	3.57703
0.44424	3.06797								0.44447	3.58309
0.44452	3.06618								0.44475	3.58617
0.44479	3.06267								0.44503	3.57781
0.44507	3.06488								0.44531	3.58348
0.44535	3.06547								0.44559	3.58596
0.44563	3.05895								0.44586	3.57806
0.4459	3.06314								0.44614	3.58763
0.44618	3.06749								0.44642	3.58506
0.44646	3.06391								0.4467	3.57706
0.44674	3.06694								0.44697	3.5854
0.44702	3.06908								0.44725	3.58804
0.44729	3.06736								0.44753	3.57857
0.44757	3.06971								0.44781	3.58412
0.44785	3.0702								0.44809	3.59063
0.44813	3.06213								0.44836	3.57775
0.4484	3.06688								0.44864	3.58964
0.44868	3.06547								0.44892	3.58592
0.44896	3.06431								0.4492	3.58151
0.44924	3.06751								0.44947	3.58844
0.44952	3.069								0.44975	3.59309
0.44979	3.06623								0.45003	3.57844
0.45007	3.06612								0.45031	3.58042
0.45035	3.06738								0.45059	3.5892
0.45063	3.0633								0.45086	3.57487
0.4509	3.06593								0.45114	3.59063
0.45118	3.06866								0.45142	3.58867
0.45146	3.06421								0.4517	3.57523
0.45174	3.06604								0.45197	3.5843
0.45202	3.06938								0.45225	3.58477
0.45229	3.06996								0.45253	3.58096
0.45257	3.06877								0.45281	3.58697
0.45285	3.07085								0.45309	3.58916
0.45313	3.06664								0.45336	3.58306
0.4534	3.06866								0.45364	3.58638
0.45368	3.06952								0.45392	3.58868
0.45396	3.06551								0.4542	3.5813
0.45424	3.0711								0.45447	3.58328
0.45452	3.07198								0.45475	3.58573
0.45479	3.06746								0.45503	3.58313
0.45507	3.06851								0.45531	3.5839
0.45535	3.06667								0.45559	3.58153
0.45563	3.06354								0.45586	3.57546
0.4559	3.06583								0.45614	3.58678
0.45618	3.07017								0.45642	3.58527
0.45646	3.06471								0.4567	3.57872
0.45674	3.06683								0.45697	3.5818
0.45702	3.06728								0.45725	3.58493
0.45729	3.06353								0.45753	3.5768
0.45757	3.06837								0.45781	3.58231
0.45785	3.06667								0.45809	3.58697
0.45813	3.0657								0.45836	3.57867
0.4584	3.06938								0.45864	3.58327
0.45868	3.07226								0.45892	3.57823
0.45896	3.06295								0.4592	3.58019
0.45924	3.06499								0.45947	3.58561
0.45952	3.0678								0.45975	3.58403
0.45979	3.06326								0.46003	3.57863
0.46007	3.06698								0.46031	3.58143
0.46035	3.06915								0.46059	3.58292
0.46063	3.0657								0.46086	3.57838
0.4609	3.06873								0.46114	3.58758
0.46118	3.0715								0.46142	3.58863
0.46146	3.0673								0.4617	3.58174
0.46174	3.07041								0.46197	3.58145
0.46202	3.07198								0.46225	3.58895
0.46229	3.06763								0.46253	3.585
0.46257	3.07259								0.46281	3.58521
0.46285	3.07259								0.46309	3.5846
0.46313	3.06824								0.46336	3.57701
0.4634	3.07221								0.46364	3.58689
0.46368	3.07402								0.46392	3.58746
0.46396	3.0708								0.4642	3.58773
0.46424	3.06946								0.46447	3.58968
0.46452	3.06881								0.46475	3.593
0.46479	3.06927								0.46503	3.58151
0.46507	3.07163								0.46531	3.58617
0.46535	3.07305								0.46559	3.5897
0.46563	3.06996								0.46586	3.58981
0.4659	3.06883								0.46614	3.58886
0.46618	3.06881								0.46642	3.58683
0.46646	3.06431								0.4667	3.58752
0.46674	3.06885								0.46697	3.59136
0.46702	3.06997								0.46725	3.57832
0.46729	3.06686								0.46753	3.58515
0.46757	3.06879								0.46781	3.58504
0.46785	3.07196								0.46809	3.58441
0.46813	3.07007								0.46836	3.58296
0.4684	3.06751								0.46864	3.59282
0.46868	3.07286								0.46892	3.5834
0.46896	3.06873								0.4692	3.58449
0.46924	3.0687								0.46947	3.58676
0.46952	3.07289								0.46975	3.59095
0.46979	3.06515								0.47003	3.5871
0.47007	3.06679								0.47031	3.59292
0.47035	3.06984								0.47059	3.59504
0.47063	3.07133								0.47086	3.58504
0.4709	3.07204								0.47114	3.59002
0.47118	3.07018								0.47142	3.58878
0.47146	3.06927								0.4717	3.58641
0.47174	3.07001								0.47197	3.58857
0.47202	3.07337								0.47225	3.59084
0.47229	3.06727								0.47253	3.58063
0.47257	3.069								0.47281	3.58409
0.47285	3.0736								0.47309	3.58786
0.47313	3.07083								0.47336	3.58157
0.4734	3.07417								0.47364	3.58931
0.47368	3.07303								0.47392	3.59296
0.47396	3.06946								0.4742	3.58031
0.47424	3.07013								0.47447	3.58971
0.47452	3.06833								0.47475	3.58815
0.47479	3.06732								0.47503	3.58552
0.47507	3.07131								0.47531	3.58054
0.47535	3.07347								0.47559	3.5933
0.47563	3.06793								0.47586	3.59239
0.4759	3.07394								0.47614	3.58901
0.47618	3.07339								0.47642	3.58519
0.47646	3.06601								0.4767	3.58491
0.47674	3.07051								0.47697	3.58798
0.47702	3.07482								0.47725	3.58246
0.47729	3.07169								0.47753	3.58874
0.47757	3.07463								0.47781	3.58615
0.47785	3.07898								0.47809	3.58865
0.47813	3.07051								0.47836	3.58445
0.4784	3.06929								0.47864	3.5908
0.47868	3.07257								0.47892	3.58529
0.47896	3.06805								0.4792	3.58208
0.47924	3.07183								0.47947	3.593
0.47952	3.07595								0.47975	3.58918
0.47979	3.07022								0.48003	3.58878
0.48007	3.076								0.48031	3.58784
0.48035	3.07516								0.48059	3.5955
0.48063	3.06635								0.48086	3.58681
0.4809	3.07175								0.48114	3.59599
0.48118	3.07518								0.48142	3.58742
0.48146	3.07125								0.4817	3.59176
0.48174	3.07501								0.48197	3.58805
0.48202	3.07116								0.48225	3.5839
0.48229	3.06889								0.48253	3.58498
0.48257	3.06936								0.48281	3.59015
0.48285	3.07648								0.48309	3.5841
0.48313	3.06749								0.48336	3.58428
0.4834	3.07064								0.48364	3.58971
0.48368	3.07198								0.48392	3.58681
0.48396	3.06812								0.4842	3.58981
0.48424	3.0686								0.48447	3.5925
0.48452	3.07018								0.48475	3.58514
0.48479	3.06843								0.48503	3.58805
0.48507	3.07528								0.48531	3.59013
0.48535	3.0732								0.48559	3.59067
0.48563	3.06906								0.48586	3.58489
0.4859	3.07123								0.48614	3.58302
0.48618	3.0707								0.48642	3.58531
0.48646	3.06828								0.4867	3.58573
0.48674	3.07259								0.48697	3.59118
0.48702	3.06967								0.48725	3.59372
0.48729	3.07137								0.48753	3.58809
0.48757	3.07463								0.48781	3.58928
0.48785	3.07841								0.48809	3.59309
0.48813	3.07259								0.48836	3.58622
0.4884	3.07606								0.48864	3.59385
0.48868	3.07543								0.48892	3.58599
0.48896	3.07387								0.4892	3.58998
0.48924	3.07329								0.48947	3.59721
0.48952	3.07221								0.48975	3.59122
0.48979	3.06809								0.49003	3.58807
0.49007	3.07108								0.49031	3.59321
0.49035	3.07242								0.49059	3.59109
0.49063	3.06877								0.49086	3.59032
0.4909	3.07221								0.49114	3.59134
0.49118	3.07221								0.49142	3.58235
0.49146	3.07165								0.4917	3.58752
0.49174	3.07282								0.49197	3.59288
0.49202	3.07564								0.49225	3.59158
0.49229	3.06931								0.49253	3.58781
0.49257	3.06986								0.49281	3.59223
0.49285	3.07039								0.49309	3.59193
0.49313	3.0662								0.49336	3.59239
0.4934	3.07072								0.49364	3.58826
0.49368	3.07106								0.49392	3.59254
0.49396	3.06631								0.4942	3.59691
0.49424	3.07301								0.49447	3.59452
0.49452	3.07432								0.49475	3.59124
0.49479	3.07265								0.49503	3.59136
0.49507	3.07295								0.49531	3.59431
0.49535	3.07093								0.49559	3.59307
0.49563	3.06809								0.49586	3.59244
0.4959	3.07308								0.49614	3.58952
0.49618	3.07131								0.49642	3.5884
0.49646	3.06971								0.4967	3.58975
0.49674	3.07354								0.49697	3.59948
0.49702	3.07226								0.49725	3.5871
0.49729	3.07003								0.49753	3.59338
0.49757	3.07013								0.49781	3.5924
0.49785	3.07333								0.49809	3.58914
0.49813	3.07265								0.49836	3.59305
0.4984	3.07593								0.49864	3.59204
0.49868	3.07135								0.49892	3.59208
0.49896	3.07137								0.4992	3.59609
0.49924	3.07127								0.49947	3.59754
0.49952	3.07263								0.49975	3.58926
0.49979	3.07034								0.50003	3.59261
0.50007	3.07329								0.50031	3.59582
0.50035	3.07209								0.50059	3.59086
0.50063	3.07022								0.50086	3.59462
0.5009	3.07347								0.50114	3.59584
0.50118	3.07131								0.50142	3.59044
0.50146	3.07156								0.5017	3.5904
0.50174	3.0723								0.50197	3.59914
0.50202	3.07362								0.50225	3.58456
0.50229	3.0706								0.50253	3.59082
0.50257	3.07763								0.50281	3.59189
0.50285	3.07259								0.50309	3.59412
0.50313	3.06831								0.50336	3.59237
0.5034	3.07488								0.50364	3.59704
0.50368	3.07343								0.50392	3.59366
0.50396	3.07106								0.5042	3.59078
0.50424	3.07673								0.50447	3.59725
0.50452	3.07417								0.50475	3.59197
0.50479	3.06963								0.50503	3.59323
0.50507	3.07253								0.50531	3.59189
0.50535	3.0731								0.50559	3.59385
0.50563	3.06837								0.50586	3.59473
0.5059	3.06992								0.50614	3.59498
0.50618	3.07211								0.50642	3.58926
0.50646	3.07024								0.5067	3.59223
0.50674	3.071								0.50697	3.59176
0.50702	3.07234								0.50725	3.59456
0.50729	3.07171								0.50753	3.59074
0.50757	3.07373								0.50781	3.60563
0.50785	3.07373								0.50809	3.59202
0.50813	3.07322								0.50836	3.59244
0.5084	3.07732								0.50864	3.59674
0.50868	3.07543								0.50892	3.5945
0.50896	3.07236								0.5092	3.58792
0.50924	3.07736								0.50947	3.59399
0.50952	3.0752								0.50975	3.59111
0.50979	3.07347								0.51003	3.59298
0.51007	3.07076								0.51031	3.59321
0.51035	3.074								0.51059	3.59269
0.51063	3.06935								0.51086	3.59036
0.5109	3.07171								0.51114	3.59916
0.51118	3.07032								0.51142	3.58462
0.51146	3.06929								0.5117	3.59307
0.51174	3.07543								0.51197	3.59319
0.51202	3.07339								0.51225	3.58708
0.51229	3.07183								0.51253	3.59252
0.51257	3.07589								0.51281	3.59924
0.51285	3.0761								0.51309	3.5863
0.51313	3.0724								0.51336	3.59067
0.5134	3.07478								0.51364	3.59305
0.51368	3.07415								0.51392	3.59269
0.51396	3.07301								0.5142	3.598
0.51424	3.07362								0.51447	3.595
0.51452	3.07244								0.51475	3.59137
0.51479	3.07299								0.51503	3.58992
0.51507	3.07385								0.51531	3.59658
0.51535	3.07507								0.51559	3.59227
0.51563	3.07335								0.51586	3.59355
0.5159	3.07799								0.51614	3.59439
0.51618	3.07814								0.51642	3.59689
0.51646	3.07673								0.5167	3.59672
0.51674	3.08068								0.51697	3.59632
0.51702	3.07537								0.51725	3.5941
0.51729	3.07139								0.51753	3.59059
0.51757	3.07543								0.51781	3.59115
0.51785	3.07637								0.51809	3.59113
0.51813	3.0735								0.51836	3.59265
0.5184	3.07452								0.51864	3.59181
0.51868	3.07501								0.51892	3.59536
0.51896	3.0716								0.5192	3.5945
0.51924	3.07831								0.51947	3.5987
0.51952	3.0749								0.51975	3.59282
0.51979	3.07102								0.52003	3.5912
0.52007	3.07591								0.52031	3.5984
0.52035	3.07532								0.52059	3.59471
0.52063	3.07131								0.52086	3.59529
0.5209	3.07665								0.52114	3.59639
0.52118	3.07679								0.52142	3.59529
0.52146	3.07467								0.5217	3.59508
0.52174	3.07753								0.52197	3.60116
0.52202	3.07797								0.52225	3.59607
0.52229	3.07322								0.52253	3.60011
0.52257	3.07785								0.52281	3.59737
0.52285	3.07618								0.52309	3.59962
0.52313	3.07343								0.52336	3.59656
0.5234	3.07684								0.52364	3.5962
0.52368	3.07723								0.52392	3.59685
0.52396	3.07497								0.5242	3.59681
0.52424	3.07694								0.52447	3.59506
0.52452	3.07818								0.52475	3.59737
0.52479	3.07051								0.52503	3.59153
0.52507	3.07736								0.52531	3.60049
0.52535	3.07663								0.52559	3.59468
0.52563	3.07032								0.52586	3.59567
0.5259	3.07906								0.52614	3.60036
0.52618	3.07606								0.52642	3.60082
0.52646	3.0727								0.5267	3.59738
0.52674	3.07789								0.52697	3.60206
0.52702	3.07627								0.52725	3.59466
0.52729	3.07507								0.52753	3.5962
0.52757	3.07677								0.52781	3.60101
0.52785	3.07574								0.52809	3.59544
0.52813	3.07421								0.52836	3.59765
0.5284	3.07656								0.52864	3.59864
0.52868	3.07209								0.52892	3.59754
0.52896	3.07421								0.5292	3.59374
0.52924	3.07677								0.52947	3.6062
0.52952	3.07442								0.52975	3.59618
0.52979	3.07251								0.53003	3.59595
0.53007	3.07392								0.53031	3.60212
0.53035	3.07597								0.53059	3.60053
0.53063	3.07381								0.53086	3.59792
0.5309	3.07801								0.53114	3.60194
0.53118	3.07734								0.53142	3.5938
0.53146	3.07408								0.5317	3.59708
0.53174	3.07757								0.53197	3.60109
0.53202	3.07532								0.53225	3.59607
0.53229	3.07356								0.53253	3.60162
0.53257	3.07633								0.53281	3.60154
0.53285	3.07515								0.53309	3.59588
0.53313	3.07499								0.53336	3.59832
0.5334	3.07988								0.53364	3.59586
0.53368	3.07658								0.53392	3.59794
0.53396	3.07432								0.5342	3.5955
0.53424	3.07553								0.53447	3.60015
0.53452	3.07396								0.53475	3.5982
0.53479	3.07404								0.53503	3.6004
0.53507	3.07997								0.53531	3.59878
0.53535	3.07726								0.53559	3.5992
0.53563	3.07562								0.53586	3.59319
0.5359	3.0765								0.53614	3.60624
0.53618	3.07816								0.53642	3.59637
0.53646	3.07707								0.5367	3.59477
0.53674	3.07709								0.53697	3.60601
0.53702	3.07724								0.53725	3.59714
0.53729	3.07301								0.53753	3.59513
0.53757	3.07797								0.53781	3.6008
0.53785	3.07915								0.53809	3.59971
0.53813	3.07669								0.53836	3.59187
0.5384	3.07927								0.53864	3.60505
0.53868	3.07909								0.53892	3.59393
0.53896	3.07463								0.5392	3.593
0.53924	3.07702								0.53947	3.59803
0.53952	3.07805								0.53975	3.59828
0.53979	3.07799								0.54003	3.59639
0.54007	3.0824								0.54031	3.60988
0.54035	3.07902								0.54059	3.59765
0.54063	3.07751								0.54086	3.59761
0.5409	3.08056								0.54114	3.60214
0.54118	3.07801								0.54142	3.60168
0.54146	3.07474								0.5417	3.60843
0.54174	3.07721								0.54197	3.60177
0.54202	3.07631								0.54225	3.59498
0.54229	3.07322								0.54253	3.59519
0.54257	3.07379								0.54281	3.6033
0.54285	3.07591								0.54309	3.59683
0.54313	3.07579								0.54336	3.59405
0.5434	3.08192								0.54364	3.60164
0.54368	3.07555								0.54392	3.60465
0.54396	3.07434								0.5442	3.59952
0.54424	3.0798								0.54447	3.60822
0.54452	3.0782								0.54475	3.59763
0.54479	3.07858								0.54503	3.59945
0.54507	3.08158								0.54531	3.60393
0.54535	3.07904								0.54559	3.59912
0.54563	3.0769								0.54586	3.59998
0.5459	3.08123								0.54614	3.60095
0.54618	3.07879								0.54642	3.59466
0.54646	3.07576								0.5467	3.59965
0.54674	3.08001								0.54697	3.60126
0.54702	3.08024								0.54725	3.6007
0.54729	3.07898								0.54753	3.59727
0.54757	3.08367								0.54781	3.60305
0.54785	3.07866								0.54809	3.59038
0.54813	3.07661								0.54836	3.60021
0.5484	3.08169								0.54864	3.61355
0.54868	3.07892								0.54892	3.60034
0.54896	3.07705								0.5492	3.59824
0.54924	3.08304								0.54947	3.59945
0.54952	3.07879								0.54975	3.59601
0.54979	3.0756								0.55003	3.59748
0.55007	3.07822								0.55031	3.60328
0.55035	3.07913								0.55059	3.60025
0.55063	3.07835								0.55086	3.59546
0.5509	3.08112								0.55114	3.60248
0.55118	3.07743								0.55142	3.60034
0.55146	3.07772								0.5517	3.59946
0.55174	3.08369								0.55197	3.6049
0.55202	3.08381								0.55225	3.60637
0.55229	3.07707								0.55253	3.59883
0.55257	3.0828								0.55281	3.60622
0.55285	3.07856								0.55309	3.59988
0.55313	3.07982								0.55336	3.60181
0.5534	3.08238								0.55364	3.60847
0.55368	3.08117								0.55392	3.59746
0.55396	3.07583								0.5542	3.59452
0.55424	3.07717								0.55447	3.60528
0.55452	3.07509								0.55475	3.60309
0.55479	3.07868								0.55503	3.60116
0.55507	3.08198								0.55531	3.60496
0.55535	3.07913								0.55559	3.59855
0.55563	3.07566								0.55586	3.6021
0.5559	3.08064								0.55614	3.60885
0.55618	3.07681								0.55642	3.60217
0.55646	3.07614								0.5567	3.59948
0.55674	3.0773								0.55697	3.61374
0.55702	3.07598								0.55725	3.60038
0.55729	3.07761								0.55753	3.60027
0.55757	3.08133								0.55781	3.60902
0.55785	3.07661								0.55809	3.60074
0.55813	3.08079								0.55836	3.60221
0.5584	3.08034								0.55864	3.60677
0.55868	3.08108								0.55892	3.60462
0.55896	3.07747								0.5592	3.60521
0.55924	3.08438								0.55947	3.61015
0.55952	3.07942								0.55975	3.60244
0.55979	3.08009								0.56003	3.60055
0.56007	3.08093								0.56031	3.60979
0.56035	3.07681								0.56059	3.6003
0.56063	3.07648								0.56086	3.60544
0.5609	3.07934								0.56114	3.61507
0.56118	3.07646								0.56142	3.6013
0.56146	3.07906								0.5617	3.60378
0.56174	3.08226								0.56197	3.60881
0.56202	3.07803								0.56225	3.60475
0.56229	3.07915								0.56253	3.59996
0.56257	3.08262								0.56281	3.60897
0.56285	3.07969								0.56309	3.6042
0.56313	3.07816								0.56336	3.60305
0.5634	3.08011								0.56364	3.61026
0.56368	3.07614								0.56392	3.60061
0.56396	3.08081								0.5642	3.60757
0.56424	3.08205								0.56447	3.60921
0.56452	3.07831								0.56475	3.59992
0.56479	3.08016								0.56503	3.60773
0.56507	3.08075								0.56531	3.60681
0.56535	3.0814								0.56559	3.60349
0.56563	3.08203								0.56586	3.60109
0.5659	3.08562								0.56614	3.61566
0.56618	3.08135								0.56642	3.60011
0.56646	3.08043								0.5667	3.6024
0.56674	3.08556								0.56697	3.60307
0.56702	3.0818								0.56725	3.60246
0.56729	3.0819								0.56753	3.60015
0.56757	3.08308								0.56781	3.6108
0.56785	3.07898								0.56809	3.60204
0.56813	3.08249								0.56836	3.61009
0.5684	3.08318								0.56864	3.61271
0.56868	3.08154								0.56892	3.60032
0.56896	3.08106								0.5692	3.60278
0.56924	3.0806								0.56947	3.6111
0.56952	3.0815								0.56975	3.60649
0.56979	3.07892								0.57003	3.6021
0.57007	3.08413								0.57031	3.61437
0.57035	3.07801								0.57059	3.60109
0.57063	3.08339								0.57086	3.60334
0.5709	3.08316								0.57114	3.61131
0.57118	3.08074								0.57142	3.60221
0.57146	3.08154								0.5717	3.60446
0.57174	3.08303								0.57197	3.60477
0.57202	3.08095								0.57225	3.60328
0.57229	3.08163								0.57253	3.60452
0.57257	3.08491								0.57281	3.61587
0.57285	3.08045								0.57309	3.60063
0.57313	3.08058								0.57336	3.60206
0.5734	3.08501								0.57364	3.6161
0.57368	3.08392								0.57392	3.60553
0.57396	3.08459								0.5742	3.61307
0.57424	3.08615								0.57447	3.60984
0.57452	3.08098								0.57475	3.60179
0.57479	3.08035								0.57503	3.60883
[truncated: 341,053+ more rows]

## Sheet: Figure 6
							b)
Time	FE CO	FE H2	Time	Potential			Time	N2 Bleed GC	FE H2
	%	%		V			h	vol%	%
0	--	--	1.09822e-09	0.10682			0	22.8668	--
0.25	95.2487	1.58708	0.000277779	0.10753			0.25	23.1273	1.58708
0.5	96.4941	1.70627	0.000555557	0.10776			0.5	23.002	1.70627
0.75	96.2511	1.69806	0.000833334	0.10804			0.75	22.9952	1.69806
1	97.0355	1.74226	0.00111	0.10802			1	23.1464	1.74226
1.25	96.665	1.76014	0.00139	0.10818			1.25	23.0995	1.76014
1.5	97.3446	1.78251	0.00167	0.10837			1.5	23.1921	1.78251
1.75	97.2057	1.79431	0.00194	0.10839			1.75	23.1743	1.79431
2	98.3774	1.83693	0.00222	0.10841			2	23.3665	1.83693
2.25	97.4901	1.83143	0.0025	0.10867			2.25	23.2112	1.83143
2.5	97.3452	1.83455	0.00278	0.10869			2.5	23.1864	1.83455
2.75	97.2193	1.84183	0.00306	0.1086			2.75	23.1639	1.84183
3	96.4979	1.83797	0.00333	0.10869			3	23.0371	1.83797
3.25	98.5973	1.88163	0.00361	0.10871			3.25	23.4191	1.88163
3.5	96.6042	1.8494	0.00389	0.10886			3.5	23.0429	1.8494
3.75	97.3175	1.86988	0.00417	0.10917			3.75	23.1726	1.86988
4	98.0575	1.88521	0.00444	0.109			4	23.3096	1.88521
4.25	97.9328	1.89754	0.00472	0.10917			4.25	23.2835	1.89754
4.5	97.4857	1.8775	0.005	0.10921			4.5	23.2021	1.8775
4.75	97.1168	1.87008	0.00528	0.10915			4.75	23.1208	1.87008
5	97.428	1.87739	0.00556	0.10917			5	23.1761	1.87739
5.25	97.2059	1.88414	0.00583	0.10913			5.25	23.1166	1.88414
5.5	97.551	1.89559	0.00611	0.10934			5.5	23.1863	1.89559
5.75	97.6996	1.91013	0.00639	0.1093			5.75	23.1942	1.91013
6	97.897	1.92148	0.00667	0.10942			6	23.2418	1.92148
6.25	98.09	1.92994	0.00694	0.10944			6.25	23.2784	1.92994
6.5	97.4046	1.92432	0.00722	0.10944			6.5	23.1487	1.92432
6.75	97.9679	1.94282	0.0075	0.10934			6.75	23.2265	1.94282
7	97.35	1.94452	0.00778	0.10963			7	23.08	1.94452
7.25	97.814	1.94902	0.00806	0.10961			7.25	23.1643	1.94902
7.5	98.0483	1.96626	0.00833	0.10972			7.5	23.1858	1.96626
7.75	97.5588	1.95743	0.00861	0.10968			7.75	23.0775	1.95743
8	98.4794	1.97571	0.00889	0.10978			8	23.2409	1.97571
8.25	98.2742	1.97367	0.00917	0.10974			8.25	23.1954	1.97367
8.5	98.7419	1.97709	0.00944	0.10972			8.5	23.2553	1.97709
8.75	99.2517	2.00142	0.00972	0.1097			8.75	23.26	2.00142
9	98.8889	2.00421	0.01	0.10991			9	23.1205	2.00421
9.25	99.6693	2.0255	0.01028	0.10978			9.25	23.2609	2.0255
9.5	99.6908	2.02857	0.01056	0.10987			9.5	23.1966	2.02857
9.75	100.07	2.03595	0.01083	0.10997			9.75	23.2316	2.03595
10	100.038	2.04418	0.01111	0.10999			10	23.2047	2.04418
10.25	100.126	2.04833	0.01139	0.11007			10.25	23.206	2.04833
10.5	99.7322	2.04018	0.01167	0.1101			10.5	23.136	2.04018
10.75	99.034	2.02909	0.01194	0.11028			10.75	22.9896	2.02909
11	100.012	2.05176	0.01222	0.11014			11	23.1676	2.05176
11.25	100.005	2.05032	0.0125	0.11014			11.25	23.1682	2.05032
11.5	99.8043	2.05323	0.01278	0.11024			11.5	23.1377	2.05323
11.75	99.9835	2.06455	0.01306	0.11026			11.75	23.1627	2.06455
12	99.5917	2.05907	0.01333	0.11035			12	23.0877	2.05907
12.25	99.9172	2.06869	0.01361	0.11033			12.25	23.1496	2.06869
12.5	99.7918	2.13822	0.01389	0.11052			12.5	23.148	2.13822
12.75	99.8764	2.17066	0.01417	0.11035			12.75	23.1734	2.17066
13	99.4996	2.13039	0.01444	0.11047			13	23.1068	2.13039
13.25	99.9736	2.12799	0.01472	0.11045			13.25	23.1745	2.12799
13.5	99.6301	2.11905	0.015	0.11045			13.5	23.1172	2.11905
13.75	99.8843	2.12213	0.01528	0.11047			13.75	23.1592	2.12213
14	99.9795	2.11959	0.01556	0.11041			14	23.1816	2.11959
14.25	99.9493	2.12225	0.01583	0.11052			14.25	23.1753	2.12225
14.5	99.5653	2.1194	0.01611	0.11064			14.5	23.1167	2.1194
14.75	99.7564	2.12553	0.01639	0.11056			14.75	23.1467	2.12553
15	99.7133	2.1266	0.01667	0.11062			15	23.1515	2.1266
15.25	99.0586	2.1145	0.01694	0.11079			15.25	23.0315	2.1145
15.5	99.1563	2.12414	0.01722	0.11064			15.5	23.0615	2.12414
15.75	100.04	2.139	0.0175	0.11085			15.75	23.2217	2.139
16	99.7178	2.13966	0.01778	0.11069			16	23.1512	2.13966
16.25	99.4002	2.13624	0.01806	0.11071			16.25	23.1152	2.13624
16.5	99.8463	2.14469	0.01833	0.11085			16.5	23.1955	2.14469
16.75	99.3903	2.14052	0.01861	0.1109			16.75	23.125	2.14052
17	98.9683	2.13268	0.01889	0.11083			17	23.0201	2.13268
17.25	99.4381	2.14272	0.01917	0.111			17.25	23.1394	2.14272
17.5	99.4857	2.14394	0.01944	0.11113			17.5	23.1464	2.14394
17.75	99.3372	2.1465	0.01972	0.11094			17.75	23.1039	2.1465
18	99.2231	2.14668	0.02	0.111			18	23.1021	2.14668
18.25	99.2359	2.14965	0.02028	0.111			18.25	23.0959	2.14965
18.5	99.2778	2.15502	0.02056	0.1111			18.5	23.1012	2.15502
18.75	99.3181	2.16224	0.02083	0.11121			18.75	23.1387	2.16224
19	99.3355	2.16568	0.02111	0.11111			19	23.1138	2.16568
19.25	99.3928	2.16351	0.02139	0.11127			19.25	23.1361	2.16351
19.5	99.495	2.16899	0.02167	0.11115			19.5	23.1482	2.16899
19.75	99.2582	2.17274	0.02194	0.11117			19.75	23.132	2.17274
20	99.2801	2.17558	0.02222	0.11127			20	23.1242	2.17558
20.25	99.2696	2.18344	0.0225	0.11125			20.25	23.1097	2.18344
20.5	99.4248	2.18827	0.02278	0.11125			20.5	23.1477	2.18827
20.75	99.1847	2.18545	0.02306	0.1114			20.75	23.1118	2.18545
21	99.5901	2.20151	0.02333	0.11131			21	23.1994	2.20151
21.25	99.31	2.20192	0.02361	0.1114			21.25	23.1265	2.20192
21.5	99.7665	2.21674	0.02389	0.11131			21.5	23.2323	2.21674
21.75	98.72	2.20777	0.02417	0.11144			21.75	23.052	2.20777
22	98.66	2.21423	0.02444	0.11146			22	23.1235	2.21423
22.25	97.7906	2.1967	0.02472	0.11142			22.25	23.0298	2.1967
22.5	98.0703	2.20497	0.025	0.1115			22.5	23.161	2.20497
22.75	97.5401	2.19263	0.02528	0.11153			22.75	23.0617	2.19263
23	97.5758	2.19349	0.02556	0.11148			23	23.0976	2.19349
23.25	97.588	2.19367	0.02583	0.11169			23.25	23.1211	2.19367
23.5	96.9899	2.18777	0.02611	0.11155			23.5	23.0154	2.18777
23.75	96.9863	2.18756	0.02639	0.11157			23.75	22.9989	2.18756
24	98.1734	2.22328	0.02667	0.11174			24	23.2193	2.22328
24.25	97.8629	2.21792	0.02694	0.11153			24.25	23.1496	2.21792
24.5	97.578	2.21809	0.02722	0.11173			24.5	23.1234	2.21809
24.75	97.8193	2.21831	0.0275	0.1118			24.75	23.1583	2.21831
25	97.9304	2.22645	0.02778	0.11184			25	23.1548	2.22645
25.25	97.8931	2.23499	0.02806	0.11178			25.25	23.1626	2.23499
25.5	97.7035	2.23641	0.02833	0.11178			25.5	23.1297	2.23641
25.75	98.2736	2.2473	0.02861	0.11195			25.75	23.2825	2.2473
26	98.3767	2.2548	0.02889	0.11194			26	23.2571	2.2548
26.25	98.3183	2.24924	0.02917	0.11197			26.25	23.2557	2.24924
26.5	98.4959	2.26558	0.02944	0.11195			26.5	23.2694	2.26558
26.75	97.5404	2.24332	0.02972	0.11192			26.75	23.0829	2.24332
27	98.3383	2.26498	0.03	0.11213			27	23.2352	2.26498
27.25	98.454	2.2707	0.03028	0.11195			27.25	23.2684	2.2707
27.5	98.531	2.27581	0.03056	0.11197			27.5	23.2696	2.27581
27.75	98.2289	2.27642	0.03083	0.11222			27.75	23.227	2.27642
28	98.0557	2.27859	0.03111	0.11201			28	23.1908	2.27859
28.25	98.255	2.2917	0.03139	0.11228			28.25	23.233	2.2917
28.5	98.4108	2.29581	0.03167	0.1122			28.5	23.2491	2.29581
28.75	98.2717	2.2975	0.03194	0.11214			28.75	23.2203	2.2975
29	98.4407	2.31043	0.03222	0.11226			29	23.2573	2.31043
29.25	97.7965	2.29396	0.0325	0.11216			29.25	23.1281	2.29396
29.5	98.1785	2.29666	0.03278	0.1122			29.5	23.2416	2.29666
29.75	98.7227	2.31951	0.03306	0.11232			29.75	23.3126	2.31951
30	98.4762	2.32163	0.03333	0.11228			30	23.2666	2.32163
30.25	98.1742	2.31632	0.03361	0.11216			30.25	23.1974	2.31632
30.5	98.5367	2.3272	0.03389	0.11255			30.5	23.2593	2.3272
30.75	97.0934	2.29107	0.03417	0.11251			30.75	22.9771	2.29107
31	98.3261	2.32545	0.03444	0.11249			31	23.2073	2.32545
31.25	97.8707	2.34178	0.03472	0.11253			31.25	23.12	2.34178
31.5	98.1483	2.33593	0.035	0.11251			31.5	23.1634	2.33593
31.75	98.7757	2.34718	0.03528	0.11241			31.75	23.3038	2.34718
32	98.6412	2.35436	0.03556	0.11256			32	23.3016	2.35436
32.25	99.0635	2.35417	0.03583	0.11251			32.25	23.3755	2.35417
32.5	99.0247	2.34517	0.03611	0.11264			32.5	23.2897	2.34517
32.75	99.389	2.37707	0.03639	0.11253			32.75	23.2767	2.37707
33	100.107	2.36823	0.03667	0.11262			33	23.3851	2.36823
33.25	100.17	2.3779	0.03694	0.11264			33.25	23.3644	2.3779
33.5	100.401	2.39253	0.03722	0.11272			33.5	23.3615	2.39253
33.75	99.7762	2.51454	0.0375	0.11277			33.75	23.2388	2.51454
34	99.6883	2.44003	0.03778	0.11274			34	23.2094	2.44003
34.25	100.389	2.44566	0.03806	0.11279			34.25	23.3244	2.44566
34.5	100.06	2.43307	0.03833	0.11293			34.5	23.2544	2.43307
34.75	99.495	2.41892	0.03861	0.11289			34.75	23.1553	2.41892
35	100.433	2.44992	0.03889	0.11289			35	23.3231	2.44992
35.25	99.8629	2.45573	0.03917	0.11289			35.25	23.1959	2.45573
35.5	100.201	2.4675	0.03944	0.11283			35.5	23.2638	2.4675
35.75	100.069	2.45782	0.03972	0.11287			35.75	23.2268	2.45782
36	100.736	2.45871	0.04	0.11306			36	23.3769	2.45871
36.25	100.098	2.46216	0.04028	0.11289			36.25	23.2243	2.46216
36.5	100.085	2.46814	0.04056	0.11304			36.5	23.2315	2.46814
36.75	99.7924	2.45165	0.04083	0.11306			36.75	23.1895	2.45165
37	99.8337	2.46867	0.04111	0.11312			37	23.1773	2.46867
37.25	100.1	2.45554	0.04139	0.11308			37.25	23.2557	2.45554
37.5	99.5154	2.46831	0.04167	0.11312			37.5	23.1254	2.46831
37.75	99.9026	2.45687	0.04194	0.11331			37.75	23.2268	2.45687
38	100.04	2.46373	0.04222	0.1131			38	23.2488	2.46373
38.25	99.5524	2.4534	0.0425	0.11327			38.25	23.166	2.4534
38.5	99.8656	2.46358	0.04278	0.11327			38.5	23.2318	2.46358
38.75	99.9755	2.47227	0.04306	0.11319			38.75	23.245	2.47227
39	99.7821	2.46986	0.04333	0.11323			39	23.2094	2.46986
39.25	99.4909	2.46601	0.04361	0.11327			39.25	23.1772	2.46601
39.5	99.5997	2.47286	0.04389	0.11335			39.5	23.1881	2.47286
39.75	98.7811	2.478	0.04417	0.11325			39.75	23.0112	2.478
40	99.2869	2.47035	0.04444	0.11327			40	23.139	2.47035
40.25	99.799	2.62656	0.04472	0.1134			40.25	23.2621	2.62656
40.5	100.061	2.55795	0.045	0.1134			40.5	23.3189	2.55795
40.75	99.9627	2.52965	0.04528	0.11327			40.75	23.243	2.52965
41	99.581	2.51027	0.04556	0.11348			41	23.1809	2.51027
41.25	99.461	2.52406	0.04583	0.11354			41.25	23.1387	2.52406
41.5	99.5925	2.54386	0.04611	0.11348			41.5	23.1668	2.54386
41.75	99.9294	2.53064	0.04639	0.11359			41.75	23.2624	2.53064
42	100.283	2.53537	0.04667	0.11348			42	23.3366	2.53537
42.25	99.8495	2.53467	0.04694	0.11365			42.25	23.266	2.53467
42.5	99.1078	2.51816	0.04722	0.11354			42.5	23.1097	2.51816
42.75	99.4915	2.52983	0.0475	0.11356			42.75	23.2039	2.52983
43	100.193	2.55173	0.04778	0.11367			43	23.3157	2.55173
43.25	99.7512	2.63538	0.04806	0.11369			43.25	23.2539	2.63538
43.5	99.125	2.62318	0.04833	0.11369			43.5	23.1069	2.62318
43.75	99.7319	2.5942	0.04861	0.11358			43.75	23.2324	2.5942
44	99.7594	2.58128	0.04889	0.11396			44	23.2577	2.58128
44.25	99.3104	2.59359	0.04917	0.11377			44.25	23.1408	2.59359
44.5	99.7914	2.58216	0.04944	0.1138			44.5	23.2539	2.58216
44.75	99.3306	2.57246	0.04972	0.11388			44.75	23.1635	2.57246
45	99.8134	2.58398	0.05	0.11386			45	23.2692	2.58398
45.25	99.9212	2.58534	0.05028	0.1139			45.25	23.2911	2.58534
45.5	99.8244	2.59495	0.05056	0.11394			45.5	23.2532	2.59495
45.75	100.066	2.60545	0.05083	0.11388			45.75	23.3381	2.60545
46	99.3285	2.58599	0.05111	0.11413			46	23.2772	2.58599
46.25	99.14	2.57681	0.05139	0.11405			46.25	23.3217	2.57681
46.5	98.8731	2.58206	0.05167	0.11388			46.5	23.3081	2.58206
46.75	98.608	2.56694	0.05194	0.11394			46.75	23.275	2.56694
47	98.5082	2.5943	0.05222	0.11405			47	23.265	2.5943
47.25	99.0685	2.59415	0.0525	0.11409			47.25	23.4146	2.59415
47.5	98.793	2.60774	0.05278	0.11398			47.5	23.3292	2.60774
47.75	99.2816	2.60864	0.05306	0.11407			47.75	23.4735	2.60864
48	99.2502	2.61358	0.05333	0.11419			48	23.4359	2.61358
48.25	99.1413	2.61396	0.05361	0.11411			48.25	23.4077	2.61396
48.5	98.8654	2.62918	0.05389	0.1143			48.5	23.3457	2.62918
48.75	98.6251	2.60482	0.05417	0.1143			48.75	23.3068	2.60482
49	99.2976	2.62334	0.05444	0.11422			49	23.4063	2.62334
49.25	99.3739	2.62968	0.05472	0.11421			49.25	23.4123	2.62968
49.5	99.5816	2.63245	0.055	0.11424			49.5	23.4648	2.63245
49.75	99.9105	2.65148	0.05528	0.11421			49.75	23.5018	2.65148
50	100.207	2.66016	0.05556	0.11417			50	23.5611	2.66016
50.25	99.1188	2.62956	0.05583	0.11426			50.25	23.3258	2.62956
50.5	100.037	2.6684	0.05611	0.1143			50.5	23.4774	2.6684
50.75	100.415	2.66157	0.05639	0.11438			50.75	23.5486	2.66157
51	100.504	2.677	0.05667	0.11445			51	23.5831	2.677
51.25	100.454	2.68245	0.05694	0.11443			51.25	23.5643	2.68245
51.5	100.286	2.68019	0.05722	0.11451			51.5	23.4996	2.68019
51.75	100.669	2.69004	0.0575	0.11438			51.75	23.5691	2.69004
52	100.774	2.6913	0.05778	0.11447			52	23.5677	2.6913
52.25	101.165	2.6954	0.05806	0.11445			52.25	23.6339	2.6954
52.5	100.884	2.694	0.05833	0.11434			52.5	23.5771	2.694
52.75	101.011	2.70184	0.05861	0.11459			52.75	23.5931	2.70184
53	100.714	2.69579	0.05889	0.11457			53	23.4874	2.69579
53.25	100.728	2.67998	0.05917	0.11453			53.25	23.571	2.67998
53.5	101.106	2.73054	0.05944	0.11459			53.5	23.6032	2.73054
53.75	101.055	2.77058	0.05972	0.11478			53.75	23.6032	2.77058
54	100.381	2.76532	0.06	0.11474			54	23.5274	2.76532
54.25	99.4142	2.78039	0.06028	0.11468			54.25	23.3331	2.78039
54.5	99.3766	2.76311	0.06056	0.11484			54.5	23.3581	2.76311
54.75	99.7772	2.80817	0.06083	0.11468			54.75	23.4178	2.80817
55	100.041	2.8126	0.06111	0.11459			55	23.4688	2.8126
55.25	100.015	2.82512	0.06139	0.11485			55.25	23.4672	2.82512
55.5	99.8996	2.83396	0.06167	0.11478			55.5	23.458	2.83396
55.75	100.443	2.83976	0.06194	0.11476			55.75	23.5861	2.83976
56	99.9288	2.83244	0.06222	0.11487			56	23.5026	2.83244
56.25	99.9413	2.85779	0.0625	0.1147			56.25	23.4854	2.85779
56.5	100.218	2.86284	0.06278	0.11493			56.5	23.4738	2.86284
56.75	100.902	2.87923	0.06306	0.11484			56.75	23.5697	2.87923
57	101.317	2.90405	0.06333	0.11491			57	23.5761	2.90405
57.25	101.259	2.91642	0.06361	0.11489			57.25	23.545	2.91642
57.5	101.497	2.92297	0.06389	0.11493			57.5	23.5645	2.92297
57.75	101.717	2.94371	0.06417	0.1148			57.75	23.5809	2.94371
58	101.799	2.95797	0.06444	0.11508			58	23.5789	2.95797
58.25	102.074	2.9775	0.06472	0.11489			58.25	23.6269	2.9775
58.5	102.165	2.96826	0.065	0.1151			58.5	23.6349	2.96826
58.75	102.188	2.98228	0.06528	0.11505			58.75	23.632	2.98228
59	101.888	2.98874	0.06556	0.11505			59	23.5849	2.98874
59.25	101.899	2.99124	0.06583	0.11506			59.25	23.5852	2.99124
59.5	101.929	2.99759	0.06611	0.1151			59.5	23.5973	2.99759
59.75	101.752	3.19285	0.06639	0.11545			59.75	23.6178	3.19285
60	101.538	3.14839	0.06667	0.11514			60	23.574	3.14839
60.25	101.802	3.06918	0.06694	0.11516			60.25	23.5834	3.06918
60.5	101.278	3.04621	0.06722	0.11501			60.5	23.4721	3.04621
60.75	101.672	3.0602	0.0675	0.11522			60.75	23.5542	3.0602
61	101.841	3.07163	0.06778	0.11516			61	23.5892	3.07163
61.25	99.4933	3.02325	0.06806	0.11545			61.25	23.1698	3.02325
61.5	101.573	3.08284	0.06833	0.1152			61.5	23.5662	3.08284
61.75	101.428	3.09405	0.06861	0.11541			61.75	23.5453	3.09405
62	101.331	3.09937	0.06889	0.11518			62	23.5322	3.09937
62.25	101.305	3.09113	0.06917	0.11531			62.25	23.5005	3.09113
62.5	101.375	3.094	0.06944	0.11529			62.5	23.5327	3.094
62.75	101.331	3.08425	0.06972	0.11527			62.75	23.4951	3.08425
63	101.181	3.07466	0.07	0.11531			63	23.4611	3.07466
63.25	101.42	3.09307	0.07028	0.11545			63.25	23.5085	3.09307
63.5	101.515	3.1173	0.07056	0.11545			63.5	23.6057	3.1173
63.75	101.467	3.11376	0.07083	0.11537			63.75	23.5509	3.11376
64	101.28	3.11624	0.07111	0.11543			64	23.5097	3.11624
64.25	101.068	3.12007	0.07139	0.11545			64.25	23.4679	3.12007
64.5	101.247	3.13934	0.07167	0.11543			64.5	23.5076	3.13934
64.75	101.066	3.13969	0.07194	0.11556			64.75	23.4869	3.13969
65	100.99	3.1491	0.07222	0.11562			65	23.4883	3.1491
65.25	100.919	3.14477	0.0725	0.11552			65.25	23.4593	3.14477
65.5	101.05	3.15557	0.07278	0.11556			65.5	23.5053	3.15557
65.75	100.85	3.15101	0.07306	0.11554			65.75	23.499	3.15101
66	100.762	3.16015	0.07333	0.11562			66	23.4608	3.16015
66.25	100.499	3.16563	0.07361	0.1156			66.25	23.4087	3.16563
66.5	100.708	3.15702	0.07389	0.11577			66.5	23.4366	3.15702
66.75	100.808	3.17675	0.07417	0.11577			66.75	23.484	3.17675
67	100.612	3.16439	0.07444	0.11571			67	23.416	3.16439
67.25	100.542	3.17192	0.07472	0.11569			67.25	23.4278	3.17192
67.5	100.067	3.14787	0.075	0.11577			67.5	23.3441	3.14787
67.75	100.246	3.17264	0.07528	0.11567			67.75	23.4064	3.17264
68	100.446	3.19072	0.07556	0.11575			68	23.4246	3.19072
68.25	99.981	3.17898	0.07583	0.11579			68.25	23.3571	3.17898
68.5	100.495	3.20069	0.07611	0.11577			68.5	23.4635	3.20069
68.75	99.2412	3.14994	0.07639	0.11569			68.75	23.2173	3.14994
69	100.164	3.19366	0.07667	0.11569			69	23.3942	3.19366
69.25	99.5833	3.1927	0.07694	0.11588			69.25	23.2967	3.1927
69.5	100.482	3.21263	0.07722	0.11602			69.5	23.4654	3.21263
69.75	99.9037	3.20274	0.0775	0.1159			69.75	23.3669	3.20274
70	100.117	3.23041	0.07778	0.11583			70	23.4439	3.23041
70.25	99.3051	3.2147	0.07806	0.11602			70.25	23.3978	3.2147
70.5	99.2052	3.2298	0.07833	0.11611			70.5	23.4324	3.2298
70.75	98.9745	3.22892	0.07861	0.11604			70.75	23.4616	3.22892
71	98.8612	3.2421	0.07889	0.11609			71	23.4564	3.2421
71.25	98.9806	3.24741	0.07917	0.11619			71.25	23.4787	3.24741
71.5	99.011	3.24681	0.07944	0.11611			71.5	23.4873	3.24681
71.75	98.7431	3.26506	0.07972	0.11627			71.75	23.4367	3.26506
72	98.5289	3.25117	0.08	0.11608			72	23.419	3.25117
72.25	98.3721	3.26977	0.08028	0.11617			72.25	23.3786	3.26977
72.5	98.4167	3.28552	0.08056	0.11613			72.5	23.4116	3.28552
72.75	98.1582	3.26787	0.08083	0.11609			72.75	23.3565	3.26787
73	98.3167	3.27322	0.08111	0.11625			73	23.3713	3.27322
73.25	98.6273	3.28873	0.08139	0.11634			73.25	23.4418	3.28873
73.5	98.7191	3.28524	0.08167	0.11629			73.5	23.4327	3.28524
73.75	98.3562	3.28926	0.08194	0.11634			73.75	23.3751	3.28926
74	98.4359	3.30675	0.08222	0.11629			74	23.4156	3.30675
74.25	98.4295	3.31399	0.0825	0.11632			74.25	23.4242	3.31399
74.5	98.7176	3.31839	0.08278	0.11629			74.5	23.4664	3.31839
74.75	99.1266	3.32249	0.08306	0.11634			74.75	23.5164	3.32249
75	98.558	3.30558	0.08333	0.11638			75	23.3955	3.30558
75.25	99.4389	3.34451	0.08361	0.1164			75.25	23.5335	3.34451
75.5	99.1188	3.33128	0.08389	0.11648			75.5	23.4583	3.33128
75.75	99.3864	3.35601	0.08417	0.11638			75.75	23.5124	3.35601
76	100.278	3.39056	0.08444	0.11632			76	23.6683	3.39056
76.25	100.582	3.36519	0.08472	0.11638			76.25	23.6851	3.36519
76.5	100.684	3.37824	0.085	0.11636			76.5	23.749	3.37824
76.75	101.031	3.38505	0.08528	0.11644			76.75	23.8135	3.38505
77	100.952	3.39468	0.08556	0.11657			77	23.7162	3.39468
77.25	100.948	3.38052	0.08583	0.11648			77.25	23.7059	3.38052
77.5	100.809	3.70622	0.08611	0.11657			77.5	23.7871	3.70622
77.75	100.853	3.57045	0.08639	0.11663			77.75	23.7648	3.57045
78	100.626	3.50106	0.08667	0.11661			78	23.7043	3.50106
78.25	100.351	3.4757	0.08694	0.11659			78.25	23.6485	3.4757
78.5	100.05	3.46993	0.08722	0.11665			78.5	23.6025	3.46993
78.75	100.121	3.48477	0.0875	0.11659			78.75	23.636	3.48477
79	99.6696	3.4587	0.08778	0.11659			79	23.5451	3.4587
79.25	99.7359	3.45668	0.08806	0.11672			79.25	23.5742	3.45668
79.5	99.5086	3.45022	0.08833	0.11676			79.5	23.5466	3.45022
79.75	99.3381	3.44926	0.08861	0.11667			79.75	23.5267	3.44926
80	98.9473	3.45175	0.08889	0.11669			80	23.4555	3.45175
80.25	99.1862	3.63659	0.08917	0.11678			80.25	23.5736	3.63659
80.5	99.3954	3.59609	0.08944	0.11686			80.5	23.5296	3.59609
80.75	99.736	3.53603	0.08972	0.11672			80.75	23.5291	3.53603
81	99.9942	3.52836	0.09	0.11688			81	23.5196	3.52836
81.25	100.289	3.53695	0.09028	0.11686			81.25	23.5423	3.53695
81.5	99.992	3.52045	0.09056	0.1169			81.5	23.4678	3.52045
81.75	100.148	3.51593	0.09083	0.11699			81.75	23.4781	3.51593
82	100.086	3.52771	0.09111	0.1168			82	23.472	3.52771
82.25	100.125	3.51068	0.09139	0.11693			82.25	23.4671	3.51068
82.5	100.187	3.51886	0.09167	0.11701			82.5	23.4949	3.51886
82.75	100.198	3.52751	0.09194	0.11697			82.75	23.4923	3.52751
83	100.26	3.51172	0.09222	0.11693			83	23.484	3.51172
83.25	100.221	3.51333	0.0925	0.11703			83.25	23.4815	3.51333
83.5	100.301	3.51559	0.09278	0.11701			83.5	23.4868	3.51559
83.75	99.9898	3.49404	0.09306	0.11705			83.75	23.4224	3.49404
84	100.199	3.49328	0.09333	0.11714			84	23.4583	3.49328
84.25	100.258	3.50139	0.09361	0.11703			84.25	23.4548	3.50139
84.5	100.309	3.50719	0.09389	0.11712			84.5	23.4836	3.50719
84.75	100.32	3.508	0.09417	0.11722			84.75	23.4973	3.508
85	98.9138	3.47591	0.09444	0.11712			85	23.2418	3.47591
85.25	100.211	3.52024	0.09472	0.11707			85.25	23.4794	3.52024
85.5	99.9901	3.51604	0.095	0.1172			85.5	23.443	3.51604
85.75	99.8069	3.51642	0.09528	0.11724			85.75	23.4232	3.51642
86	99.7113	3.50422	0.09556	0.11732			86	23.4135	3.50422
86.25	99.7409	3.51876	0.09583	0.11716			86.25	23.4196	3.51876
86.5	99.8322	3.49552	0.09611	0.11724			86.5	23.429	3.49552
86.75	99.2655	3.49655	0.09639	0.11716			86.75	23.3109	3.49655
87	99.7432	3.50974	0.09667	0.11726			87	23.4308	3.50974
87.25	99.8477	3.51985	0.09694	0.11728			87.25	23.4261	3.51985
87.5	99.7884	3.5107	0.09722	0.11724			87.5	23.4187	3.5107
87.75	99.7516	3.52057	0.0975	0.11739			87.75	23.4225	3.52057
88	99.8432	3.55566	0.09778	0.11722			88	23.4415	3.55566
88.25	99.4256	3.74721	0.09806	0.11714			88.25	23.4411	3.74721
88.5	99.5381	3.66873	0.09833	0.11743			88.5	23.4355	3.66873
88.75	99.5692	3.63645	0.09861	0.11758			88.75	23.4385	3.63645
89	99.6451	3.64243	0.09889	0.11733			89	23.4462	3.64243
89.25	99.6842	3.63188	0.09917	0.11739			89.25	23.4658	3.63188
89.5	99.7712	3.62559	0.09944	0.11749			89.5	23.4702	3.62559
89.75	99.6291	3.61412	0.09972	0.11739			89.75	23.4582	3.61412
90	99.0991	3.59235	0.1	0.11743			90	23.3388	3.59235
90.25	99.6828	3.60751	0.10028	0.11737			90.25	23.4447	3.60751
90.5	99.6089	3.61863	0.10056	0.11747			90.5	23.4286	3.61863
90.75	99.6796	3.62282	0.10083	0.11764			90.75	23.4581	3.62282
91	99.6575	3.63493	0.10111	0.11766			91	23.4445	3.63493
91.25	99.6565	3.62582	0.10139	0.11743			91.25	23.4545	3.62582
91.5	99.6121	3.64357	0.10167	0.11762			91.5	23.4474	3.64357
91.75	99.6443	3.63267	0.10194	0.11758			91.75	23.4421	3.63267
92	99.6832	3.64201	0.10222	0.11766			92	23.462	3.64201
92.25	99.7423	3.60564	0.1025	0.11777			92.25	23.4811	3.60564
92.5	99.7641	3.58493	0.10278	0.11774			92.5	23.4651	3.58493
92.75	99.7732	3.57532	0.10306	0.11764			92.75	23.4686	3.57532
93	99.792	3.58186	0.10333	0.1177			93	23.4504	3.58186
93.25	99.9962	3.58334	0.10361	0.11774			93.25	23.489	3.58334
93.5	98.8318	3.56305	0.10389	0.11766			93.5	23.3524	3.56305
93.75	99.0519	3.57001	0.10417	0.11775			93.75	23.4726	3.57001
94	98.6572	3.5711	0.10444	0.11787			94	23.451	3.5711
94.25	98.5921	3.58398	0.10472	0.11787			94.25	23.4647	3.58398
94.5	98.4212	3.59036	0.105	0.11768			94.5	23.464	3.59036
94.75	98.4283	3.60303	0.10528	0.11785			94.75	23.4793	3.60303
95	98.5027	3.60789	0.10556	0.11783			95	23.5128	3.60789
95.25	98.5503	3.62502	0.10583	0.11772			95.25	23.5042	3.62502
95.5	97.9697	3.97628	0.10611	0.11783			95.5	23.5092	3.97628
95.75	98.4611	3.80641	0.10639	0.11781			95.75	23.581	3.80641
96	98.5998	3.76993	0.10667	0.11787			96	23.5641	3.76993
96.25	98.7949	3.77144	0.10694	0.11804			96.25	23.5852	3.77144
96.5	98.4326	3.7501	0.10722	0.11779			96.5	23.4977	3.7501
96.75	98.5704	3.75045	0.1075	0.11791			96.75	23.5164	3.75045
97	98.5834	3.7297	0.10778	0.1181			97	23.5103	3.7297
97.25	98.7094	3.72227	0.10806	0.11802			97.25	23.5532	3.72227
97.5	98.9826	3.72521	0.10833	0.11808			97.5	23.5879	3.72521
97.75	99.2426	3.72663	0.10861	0.11796			97.75	23.6322	3.72663
98	98.896	3.70825	0.10889	0.11806			98	23.5416	3.70825
98.25	99.2698	3.71845	0.10917	0.11802			98.25	23.6256	3.71845
98.5	98.8367	3.70041	0.10944	0.11816			98.5	23.5281	3.70041
98.75	98.2658	3.66558	0.10972	0.11821			98.75	23.4044	3.66558
99	99.0529	3.69521	0.11	0.11812			99	23.5721	3.69521
99.25	98.7713	3.67254	0.11028	0.11823			99.25	23.525	3.67254
99.5	98.708	3.65969	0.11056	0.1181			99.5	23.5249	3.65969
99.75	99.0348	3.64845	0.11083	0.11812			99.75	23.5507	3.64845
100	--	--	0.11111	0.11812			100	--	--
100.25	--	--	0.11139	0.11804			100.25	--	--
100.5	--	--	0.11167	0.11829			100.5	--	--
100.75	--	--	0.11194	0.11814			100.75	--	--
101	--	--	0.11222	0.11827			101	--	--
101.25	--	--	0.1125	0.11817			101.25	--	--
101.5	--	--	0.11278	0.11823			101.5	--	--
101.75	--	--	0.11306	0.11829			101.75	--	--
102	--	--	0.11333	0.11838			102	--	--
102.25	--	--	0.11361	0.11837			102.25	--	--
102.5	--	--	0.11389	0.11837			102.5	--	--
102.75	--	--	0.11417	0.11825			102.75	--	--
103	--	--	0.11444	0.11848			103	--	--
103.25	--	--	0.11472	0.11831			103.25	--	--
103.5	--	--	0.115	0.11838			103.5	--	--
103.75	--	--	0.11528	0.11838			103.75	--	--
104	--	--	0.11556	0.11838			104	--	--
104.25	--	--	0.11583	0.11857			104.25	--	--
104.5	--	--	0.11611	0.11838			104.5	--	--
104.75	--	--	0.11639	0.11863			104.75	--	--
105	--	--	0.11667	0.11856			105	--	--
105.25	--	--	0.11694	0.11852			105.25	--	--
105.5	--	--	0.11722	0.11846			105.5	--	--
105.75	--	--	0.1175	0.11882			105.75	--	--
106	--	--	0.11778	0.11857			106	--	--
106.25	--	--	0.11806	0.11856			106.25	--	--
106.5	--	--	0.11833	0.11861			106.5	--	--
106.75	--	--	0.11861	0.11861			106.75	--	--
107	--	--	0.11889	0.11863			107	--	--
107.25	--	--	0.11917	0.11863			107.25	--	--
107.5	--	--	0.11944	0.11859			107.5	--	--
107.75	--	--	0.11972	0.11852			107.75	--	--
108	--	--	0.12	0.11877			108	--	--
108.25	--	--	0.12028	0.11865			108.25	--	--
108.5	--	--	0.12056	0.11884			108.5	--	--
108.75	--	--	0.12083	0.11884			108.75	--	--
109	--	--	0.12111	0.1189			109	--	--
109.25	--	--	0.12139	0.11877			109.25	--	--
109.5	--	--	0.12167	0.11894			109.5	--	--
109.75	--	--	0.12194	0.11873			109.75	--	--
110	--	--	0.12222	0.11884			110	--	--
110.25	--	--	0.1225	0.11892			110.25	--	--
110.5	--	--	0.12278	0.1188			110.5	--	--
110.75	--	--	0.12306	0.11901			110.75	--	--
111	--	--	0.12333	0.11888			111	--	--
111.25	--	--	0.12361	0.1189			111.25	--	--
111.5	--	--	0.12389	0.11882			111.5	--	--
111.75	--	--	0.12417	0.11894			111.75	--	--
112	--	--	0.12444	0.11892			112	--	--
112.25	--	--	0.12472	0.11886			112.25	--	--
112.5	--	--	0.125	0.11909			112.5	--	--
112.75	--	--	0.12528	0.11896			112.75	--	--
113	--	--	0.12556	0.11903			113	--	--
113.25	--	--	0.12583	0.11907			113.25	--	--
113.5	--	--	0.12611	0.11903			113.5	--	--
113.75	--	--	0.12639	0.11896			113.75	--	--
114	--	--	0.12667	0.11898			114	--	--
114.25	--	--	0.12694	0.11907			114.25	--	--
114.5	--	--	0.12722	0.11922			114.5	--	--
114.75	--	--	0.1275	0.11922			114.75	--	--
115	--	--	0.12778	0.1192			115	--	--
115.25	--	--	0.12806	0.11915			115.25	--	--
115.5	--	--	0.12833	0.11932			115.5	--	--
115.75	--	--	0.12861	0.11928			115.75	--	--
116	--	--	0.12889	0.11919			116	--	--
116.25	--	--	0.12917	0.11936			116.25	--	--
116.5	--	--	0.12944	0.11924			116.5	--	--
116.75	--	--	0.12972	0.11919			116.75	--	--
117	--	--	0.13	0.11928			117	--	--
117.25	--	--	0.13028	0.1192			117.25	--	--
117.5	--	--	0.13056	0.11926			117.5	--	--
117.75	--	--	0.13083	0.11928			117.75	--	--
118	--	--	0.13111	0.11922			118	--	--
118.25	--	--	0.13139	0.11938			118.25	--	--
118.5	--	--	0.13167	0.11926			118.5	--	--
118.75	--	--	0.13194	0.11928			118.75	--	--
119	--	--	0.13222	0.11911			119	--	--
119.25	--	--	0.1325	0.11932			119.25	--	--
119.5	--	--	0.13278	0.11928			119.5	--	--
119.75	--	--	0.13306	0.1194			119.75	--	--
120	--	--	0.13333	0.11949			120	--	--
120.25	--	--	0.13361	0.11928			120.25	--	--
120.5	--	--	0.13389	0.11943			120.5	--	--
120.75	--	--	0.13417	0.11945			120.75	--	--
121	--	--	0.13444	0.1194			121	--	--
121.25	--	--	0.13472	0.1194			121.25	--	--
121.5	--	--	0.135	0.11947			121.5	--	--
121.75	--	--	0.13528	0.1194			121.75	--	--
122	--	--	0.13556	0.11941			122	--	--
122.25	--	--	0.13583	0.11936			122.25	--	--
122.5	--	--	0.13611	0.11941			122.5	--	--
122.75	--	--	0.13639	0.11953			122.75	--	--
123	--	--	0.13667	0.1194			123	--	--
123.25	--	--	0.13694	0.11953			123.25	--	--
123.5	--	--	0.13722	0.11957			123.5	--	--
123.75	--	--	0.1375	0.1197			123.75	--	--
124	--	--	0.13778	0.11953			124	--	--
124.25	--	--	0.13806	0.11953			124.25	--	--
124.5	--	--	0.13833	0.11972			124.5	--	--
124.75	--	--	0.13861	0.11968			124.75	--	--
125	--	--	0.13889	0.11972			125	--	--
125.25	--	--	0.13917	0.11959			125.25	--	--
125.5	--	--	0.13944	0.11978			125.5	--	--
125.75	--	--	0.13972	0.11953			125.75	--	--
126	--	--	0.14	0.11974			126	--	--
126.25	--	--	0.14028	0.11972			126.25	--	--
126.5	--	--	0.14056	0.11964			126.5	--	--
126.75	--	--	0.14083	0.11966			126.75	--	--
127	--	--	0.14111	0.11972			127	--	--
127.25	--	--	0.14139	0.1197			127.25	--	--
127.5	--	--	0.14167	0.11974			127.5	--	--
127.75	--	--	0.14194	0.11972			127.75	--	--
128	--	--	0.14222	0.1198			128	--	--
128.25	--	--	0.1425	0.11962			128.25	--	--
128.5	--	--	0.14278	0.11972			128.5	--	--
128.75	--	--	0.14306	0.11982			128.75	--	--
129	--	--	0.14333	0.11978			129	--	--
129.25	--	--	0.14361	0.11976			129.25	--	--
129.5	--	--	0.14389	0.11987			129.5	--	--
129.75	--	--	0.14417	0.11976			129.75	--	--
130	--	--	0.14444	0.11989			130	--	--
130.25	--	--	0.14472	0.11987			130.25	--	--
130.5	--	--	0.145	0.11982			130.5	--	--
130.75	--	--	0.14528	0.11982			130.75	--	--
131	--	--	0.14556	0.11993			131	--	--
131.25	--	--	0.14583	0.11995			131.25	--	--
131.5	--	--	0.14611	0.11978			131.5	--	--
131.75	--	--	0.14639	0.11993			131.75	--	--
132	--	--	0.14667	0.11991			132	--	--
132.25	--	--	0.14694	0.11989			132.25	--	--
132.5	--	--	0.14722	0.12006			132.5	--	--
132.75	--	--	0.1475	0.11999			132.75	--	--
133	--	--	0.14778	0.12004			133	--	--
133.25	--	--	0.14806	0.11997			133.25	--	--
133.5	--	--	0.14833	0.12006			133.5	--	--
133.75	--	--	0.14861	0.12002			133.75	--	--
134	--	--	0.14889	0.12016			134	--	--
134.25	--	--	0.14917	0.12018			134.25	--	--
134.5	--	--	0.14944	0.11995			134.5	--	--
134.75	--	--	0.14972	0.12004			134.75	--	--
135	--	--	0.15	0.1201			135	--	--
135.25	--	--	0.15028	0.12004			135.25	--	--
135.5	--	--	0.15056	0.12002			135.5	--	--
135.75	--	--	0.15083	0.12016			135.75	--	--
136	--	--	0.15111	0.1201			136	--	--
136.25	--	--	0.15139	0.12006			136.25	--	--
136.5	--	--	0.15167	0.12014			136.5	--	--
136.75	--	--	0.15194	0.12014			136.75	--	--
137	--	--	0.15222	0.12018			137	--	--
137.25	--	--	0.1525	0.12018			137.25	--	--
137.5	--	--	0.15278	0.12023			137.5	--	--
137.75	--	--	0.15306	0.12006			137.75	--	--
138	--	--	0.15333	0.12027			138	--	--
138.25	--	--	0.15361	0.12033			138.25	--	--
138.5	--	--	0.15389	0.12027			138.5	--	--
138.75	--	--	0.15417	0.12041			138.75	--	--
139	--	--	0.15444	0.12029			139	--	--
139.25	--	--	0.15472	0.12029			139.25	--	--
139.5	--	--	0.155	0.12031			139.5	--	--
139.75	--	--	0.15528	0.12022			139.75	--	--
140	--	--	0.15556	0.12025			140	--	--
140.25	--	--	0.15583	0.12029			140.25	--	--
140.5	--	--	0.15611	0.12016			140.5	--	--
140.75	--	--	0.15639	0.12023			140.75	--	--
141	--	--	0.15667	0.12035			141	--	--
141.25	--	--	0.15694	0.12035			141.25	--	--
141.5	--	--	0.15722	0.12043			141.5	--	--
141.75	--	--	0.1575	0.12029			141.75	--	--
142	--	--	0.15778	0.12023			142	--	--
142.25	--	--	0.15806	0.12039			142.25	--	--
142.5	--	--	0.15833	0.12031			142.5	--	--
142.75	--	--	0.15861	0.12035			142.75	--	--
143	--	--	0.15889	0.12037			143	--	--
143.25	--	--	0.15917	0.12043			143.25	--	--
143.5	--	--	0.15944	0.12044			143.5	--	--
143.75	--	--	0.15972	0.12043			143.75	--	--
144	--	--	0.16	0.12044			144	--	--
144.25	--	--	0.16028	0.12044			144.25	--	--
144.5	--	--	0.16056	0.12044			144.5	--	--
144.75	--	--	0.16083	0.12048			144.75	--	--
145	--	--	0.16111	0.12062			145	--	--
145.25	--	--	0.16139	0.12048			145.25	--	--
145.5	--	--	0.16167	0.12048			145.5	--	--
145.75	--	--	0.16194	0.1205			145.75	--	--
146	--	--	0.16222	0.12054			146	--	--
146.25	--	--	0.1625	0.12064			146.25	--	--
146.5	--	--	0.16278	0.12058			146.5	--	--
146.75	--	--	0.16306	0.12069			146.75	--	--
147	--	--	0.16333	0.12062			147	--	--
147.25	--	--	0.16361	0.12062			147.25	--	--
147.5	--	--	0.16389	0.12065			147.5	--	--
147.75	--	--	0.16417	0.12056			147.75	--	--
148	--	--	0.16444	0.12073			148	--	--
148.25	--	--	0.16472	0.12046			148.25	--	--
148.5	--	--	0.165	0.1206			148.5	--	--
148.75	--	--	0.16528	0.12073			148.75	--	--
149	--	--	0.16556	0.12065			149	--	--
149.25	--	--	0.16583	0.12075			149.25	--	--
149.5	--	--	0.16611	0.12073			149.5	--	--
149.75	--	--	0.16639	0.12067			149.75	--	--
150	--	--	0.16667	0.12064			150	--	--
150.25	--	--	0.16694	0.12088			150.25	--	--
150.5	--	--	0.16722	0.12085			150.5	--	--
150.75	--	--	0.1675	0.12088			150.75	--	--
151	--	--	0.16778	0.12069			151	--	--
151.25	--	--	0.16806	0.12064			151.25	--	--
151.5	--	--	0.16833	0.12067			151.5	--	--
151.75	--	--	0.16861	0.12064			151.75	--	--
152	--	--	0.16889	0.12073			152	--	--
152.25	--	--	0.16917	0.12065			152.25	--	--
152.5	--	--	0.16944	0.12069			152.5	--	--
152.75	--	--	0.16972	0.1209			152.75	--	--
153	--	--	0.17	0.12079			153	--	--
153.25	--	--	0.17028	0.12081			153.25	--	--
153.5	--	--	0.17056	0.12096			153.5	--	--
153.75	--	--	0.17083	0.12077			153.75	--	--
154	--	--	0.17111	0.12083			154	--	--
154.25	--	--	0.17139	0.12081			154.25	--	--
154.5	--	--	0.17167	0.12088			154.5	--	--
154.75	--	--	0.17194	0.12077			154.75	--	--
155	--	--	0.17222	0.12079			155	--	--
155.25	--	--	0.1725	0.12083			155.25	--	--
155.5	--	--	0.17278	0.12081			155.5	--	--
155.75	--	--	0.17306	0.12083			155.75	--	--
156	--	--	0.17333	0.12083			156	--	--
156.25	--	--	0.17361	0.12096			156.25	--	--
156.5	--	--	0.17389	0.12096			156.5	--	--
156.75	--	--	0.17417	0.12081			156.75	--	--
157	--	--	0.17444	0.12102			157	--	--
157.25	--	--	0.17472	0.12098			157.25	--	--
157.5	--	--	0.175	0.12094			157.5	--	--
157.75	--	--	0.17528	0.12102			157.75	--	--
158	--	--	0.17556	0.12102			158	--	--
158.25	--	--	0.17583	0.12098			158.25	--	--
158.5	--	--	0.17611	0.121			158.5	--	--
158.75	--	--	0.17639	0.1209			158.75	--	--
159	--	--	0.17667	0.12102			159	--	--
159.25	--	--	0.17694	0.12104			159.25	--	--
159.5	--	--	0.17722	0.12102			159.5	--	--
159.75	--	--	0.1775	0.12094			159.75	--	--
160	--	--	0.17778	0.12111			160	--	--
160.25	--	--	0.17806	0.121			160.25	--	--
160.5	--	--	0.17833	0.12102			160.5	--	--
160.75	--	--	0.17861	0.12104			160.75	--	--
161	--	--	0.17889	0.12113			161	--	--
161.25	--	--	0.17917	0.12106			161.25	--	--
161.5	--	--	0.17944	0.12109			161.5	--	--
161.75	--	--	0.17972	0.12109			161.75	--	--
162	--	--	0.18	0.12117			162	--	--
162.25	--	--	0.18028	0.12121			162.25	--	--
162.5	--	--	0.18056	0.121			162.5	--	--
162.75	--	--	0.18083	0.12111			162.75	--	--
163	--	--	0.18111	0.12119			163	--	--
163.25	--	--	0.18139	0.12107			163.25	--	--
163.5	--	--	0.18167	0.12119			163.5	--	--
163.75	--	--	0.18194	0.12106			163.75	--	--
164	--	--	0.18222	0.12117			164	--	--
164.25	--	--	0.1825	0.12113			164.25	--	--
164.5	--	--	0.18278	0.12115			164.5	--	--
164.75	--	--	0.18306	0.12107			164.75	--	--
165	--	--	0.18333	0.12115			165	--	--
165.25	--	--	0.18361	0.12125			165.25	--	--
165.5	--	--	0.18389	0.12119			165.5	--	--
165.75	--	--	0.18417	0.12123			165.75	--	--
166	--	--	0.18444	0.12128			166	--	--
166.25	--	--	0.18472	0.12115			166.25	--	--
166.5	--	--	0.185	0.12119			166.5	--	--
166.75	--	--	0.18528	0.12123			166.75	--	--
167	--	--	0.18556	0.12128			167	--	--
167.25	--	--	0.18583	0.12127			167.25	--	--
167.5	--	--	0.18611	0.12128			167.5	--	--
167.75	--	--	0.18639	0.12138			167.75	--	--
168	--	--	0.18667	0.1213			168	--	--
168.25	--	--	0.18694	0.12127			168.25	--	--
168.5	--	--	0.18722	0.12138			168.5	--	--
168.75	--	--	0.1875	0.12144			168.75	--	--
169	--	--	0.18778	0.12136			169	--	--
169.25	--	--	0.18806	0.12134			169.25	--	--
169.5	--	--	0.18833	0.12134			169.5	--	--
169.75	--	--	0.18861	0.12148			169.75	--	--
170	--	--	0.18889	0.1213			170	--	--
170.25	--	--	0.18917	0.12138			170.25	--	--
170.5	--	--	0.18944	0.12151			170.5	--	--
170.75	--	--	0.18972	0.12136			170.75	--	--
171	--	--	0.19	0.12151			171	--	--
171.25	--	--	0.19028	0.12144			171.25	--	--
171.5	--	--	0.19056	0.1214			171.5	--	--
171.75	--	--	0.19083	0.12149			171.75	--	--
172	--	--	0.19111	0.12146			172	--	--
172.25	--	--	0.19139	0.12167			172.25	--	--
172.5	--	--	0.19167	0.12151			172.5	--	--
172.75	--	--	0.19194	0.12134			172.75	--	--
173	--	--	0.19222	0.12151			173	--	--
173.25	--	--	0.1925	0.12157			173.25	--	--
173.5	--	--	0.19278	0.12155			173.5	--	--
173.75	--	--	0.19306	0.12151			173.75	--	--
174	--	--	0.19333	0.12167			174	--	--
174.25	--	--	0.19361	0.12151			174.25	--	--
174.5	--	--	0.19389	0.12155			174.5	--	--
174.75	--	--	0.19417	0.12182			174.75	--	--
175	--	--	0.19444	0.12165			175	--	--
175.25	--	--	0.19472	0.12163			175.25	--	--
175.5	--	--	0.195	0.12168			175.5	--	--
175.75	--	--	0.19528	0.12167			175.75	--	--
176	--	--	0.19556	0.12161			176	--	--
176.25	--	--	0.19583	0.12163			176.25	--	--
176.5	--	--	0.19611	0.12155			176.5	--	--
176.75	--	--	0.19639	0.12159			176.75	--	--
177	--	--	0.19667	0.12163			177	--	--
177.25	--	--	0.19694	0.12163			177.25	--	--
177.5	--	--	0.19722	0.12163			177.5	--	--
177.75	--	--	0.1975	0.12178			177.75	--	--
178	--	--	0.19778	0.12163			178	--	--
178.25	--	--	0.19806	0.12163			178.25	--	--
178.5	--	--	0.19833	0.12168			178.5	--	--
178.75	--	--	0.19861	0.12157			178.75	--	--
179	--	--	0.19889	0.12182			179	--	--
179.25	--	--	0.19917	0.1218			179.25	--	--
179.5	--	--	0.19944	0.12167			179.5	--	--
179.75	--	--	0.19972	0.12172			179.75	--	--
180	--	--	0.2	0.12168			180	--	--
180.25	--	--	0.20028	0.12163			180.25	--	--
180.5	--	--	0.20056	0.12176			180.5	--	--
180.75	--	--	0.20083	0.12167			180.75	--	--
181	--	--	0.20111	0.12178			181	--	--
181.25	--	--	0.20139	0.12176			181.25	--	--
181.5	--	--	0.20167	0.12188			181.5	--	--
181.75	--	--	0.20194	0.1218			181.75	--	--
182	--	--	0.20222	0.12178			182	--	--
182.25	--	--	0.2025	0.12174			182.25	--	--
182.5	--	--	0.20278	0.12186			182.5	--	--
182.75	--	--	0.20306	0.12188			182.75	--	--
183	--	--	0.20333	0.12188			183	--	--
183.25	--	--	0.20361	0.12188			183.25	--	--
183.5	--	--	0.20389	0.12186			183.5	--	--
183.75	--	--	0.20417	0.12197			183.75	--	--
184	--	--	0.20444	0.1218			184	--	--
184.25	--	--	0.20472	0.12188			184.25	--	--
184.5	--	--	0.205	0.12195			184.5	--	--
184.75	--	--	0.20528	0.12184			184.75	--	--
185	--	--	0.20556	0.12184			185	--	--
185.25	--	--	0.20583	0.12182			185.25	--	--
185.5	--	--	0.20611	0.12189			185.5	--	--
185.75	--	--	0.20639	0.12182			185.75	--	--
186	--	--	0.20667	0.12193			186	--	--
186.25	--	--	0.20694	0.12184			186.25	--	--
186.5	--	--	0.20722	0.12188			186.5	--	--
186.75	--	--	0.2075	0.12195			186.75	--	--
187	--	--	0.20778	0.12195			187	--	--
187.25	--	--	0.20806	0.12207			187.25	--	--
187.5	--	--	0.20833	0.12195			187.5	--	--
187.75	--	--	0.20861	0.12189			187.75	--	--
188	--	--	0.20889	0.12212			188	--	--
188.25	--	--	0.20917	0.12191			188.25	--	--
188.5	--	--	0.20944	0.12201			188.5	--	--
188.75	--	--	0.20972	0.1221			188.75	--	--
189	--	--	0.21	0.12203			189	--	--
189.25	--	--	0.21028	0.12207			189.25	--	--
189.5	--	--	0.21056	0.12193			189.5	--	--
189.75	--	--	0.21083	0.12195			189.75	--	--
190	--	--	0.21111	0.12205			190	--	--
190.25	--	--	0.21139	0.12199			190.25	--	--
190.5	--	--	0.21167	0.12203			190.5	--	--
190.75	--	--	0.21194	0.12201			190.75	--	--
191	--	--	0.21222	0.12212			191	--	--
191.25	--	--	0.2125	0.12197			191.25	--	--
191.5	--	--	0.21278	0.1222			191.5	--	--
191.75	--	--	0.21306	0.12216			191.75	--	--
192	--	--	0.21333	0.12205			192	--	--
192.25	--	--	0.21361	0.12205			192.25	--	--
192.5	--	--	0.21389	0.12212			192.5	--	--
192.75	--	--	0.21417	0.12207			192.75	--	--
193	--	--	0.21444	0.12207			193	--	--
193.25	--	--	0.21472	0.12218			193.25	--	--
193.5	--	--	0.215	0.12216			193.5	--	--
193.75	--	--	0.21528	0.1221			193.75	--	--
194	--	--	0.21556	0.12203			194	--	--
194.25	--	--	0.21583	0.1221			194.25	--	--
194.5	--	--	0.21611	0.12201			194.5	--	--
194.75	--	--	0.21639	0.12218			194.75	--	--
195	--	--	0.21667	0.1221			195	--	--
195.25	--	--	0.21694	0.12212			195.25	--	--
195.5	--	--	0.21722	0.12231			195.5	--	--
195.75	--	--	0.2175	0.12214			195.75	--	--
196	--	--	0.21778	0.12226			196	--	--
196.25	--	--	0.21806	0.12212			196.25	--	--
196.5	--	--	0.21833	0.12203			196.5	--	--
196.75	--	--	0.21861	0.12226			196.75	--	--
197	--	--	0.21889	0.1223			197	--	--
197.25	--	--	0.21917	0.1223			197.25	--	--
197.5	--	--	0.21944	0.12205			197.5	--	--
197.75	--	--	0.21972	0.12216			197.75	--	--
198	--	--	0.22	0.12239			198	--	--
198.25	--	--	0.22028	0.1223			198.25	--	--
198.5	--	--	0.22056	0.12231			198.5	--	--
198.75	--	--	0.22083	0.12218			198.75	--	--
199	--	--	0.22111	0.12216			199	--	--
199.25	--	--	0.22139	0.12222			199.25	--	--
199.5	--	--	0.22167	0.12222			199.5	--	--
199.75	--	--	0.22194	0.12224			199.75	--	--
200			0.22222	0.12222			200
			0.2225	0.12233
			0.22278	0.12245
			0.22306	0.12235
			0.22333	0.1223
			0.22361	0.12256
			0.22389	0.12235
			0.22417	0.12235
			0.22444	0.12245
			0.22472	0.1223
			0.225	0.12235
			0.22528	0.12245
			0.22556	0.12256
			0.22583	0.12224
			0.22611	0.12251
			0.22639	0.12245
			0.22667	0.12233
			0.22694	0.12237
			0.22722	0.12251
			0.2275	0.12239
			0.22778	0.12245
			0.22806	0.12239
			0.22833	0.12243
			0.22861	0.12243
			0.22889	0.12256
			0.22917	0.12254
			0.22944	0.12251
			0.22972	0.12258
			0.23	0.12245
			0.23028	0.12252
			0.23056	0.12254
			0.23083	0.12249
			0.23111	0.12252
			0.23139	0.12262
			0.23167	0.12247
			0.23194	0.12256
			0.23222	0.12251
			0.2325	0.12258
			0.23278	0.12256
			0.23306	0.12249
			0.23333	0.12256
			0.23361	0.12252
			0.23389	0.12262
			0.23417	0.12262
			0.23444	0.12256
			0.23472	0.12272
			0.235	0.12262
			0.23528	0.1226
			0.23556	0.1226
			0.23583	0.12268
			0.23611	0.12266
			0.23639	0.1226
			0.23667	0.12262
			0.23694	0.12258
			0.23722	0.12254
			0.2375	0.12262
			0.23778	0.12262
			0.23806	0.12258
			0.23833	0.12275
			0.23861	0.1226
			0.23889	0.12285
			0.23917	0.12258
			0.23944	0.12293
			0.23972	0.12268
			0.24	0.12281
			0.24028	0.12281
			0.24056	0.12279
			0.24083	0.12262
			0.24111	0.12289
			0.24139	0.12285
			0.24167	0.12291
			0.24194	0.12281
			0.24222	0.12291
			0.2425	0.12289
			0.24278	0.12275
			0.24306	0.12283
			0.24333	0.12289
			0.24361	0.12283
			0.24389	0.12294
			0.24417	0.12298
			0.24444	0.12277
			0.24472	0.12294
			0.245	0.12273
			0.24528	0.12287
			0.24556	0.12298
			0.24583	0.12281
			0.24611	0.12306
			0.24639	0.12296
			0.24667	0.12296
			0.24694	0.12287
			0.24722	0.123
			0.2475	0.123
			0.24778	0.12294
			0.24806	0.12298
			0.24833	0.12281
			0.24861	0.12293
			0.24889	0.12298
			0.24917	0.12296
			0.24944	0.12293
			0.24972	0.12291
			0.25	0.12376
			0.25	0.44981
			0.25	0.65135
			0.25001	0.8515
			0.25002	1.0525
			0.25003	1.25267
			0.25005	1.45297
			0.25007	1.65331
			0.25009	1.85365
			0.25012	2.05411
			0.25014	2.25438
			0.25016	2.45451
			0.25019	2.65457
			0.25022	2.85466
			0.25028	3.05469
			0.25056	3.11519
			0.25083	3.02798
			0.25111	2.9899
			0.25139	2.97688
			0.25167	2.97585
			0.25195	2.97845
			0.25222	2.97929
			0.2525	2.98024
			0.25278	2.97992
			0.25306	2.97906
			0.25333	2.97883
			0.25361	2.97765
			0.25389	2.97696
			0.25417	2.97893
			0.25445	2.97927
			0.25472	2.97671
			0.255	2.98081
			0.25528	2.98316
			0.25556	2.97843
			0.25583	2.98354
			0.25611	2.98486
			0.25639	2.97944
			0.25667	2.98576
			0.25695	2.98667
			0.25722	2.98003
			0.2575	2.9865
			0.25778	2.98745
			0.25806	2.97994
			0.25833	2.98694
			0.25861	2.98839
			0.25889	2.98093
			0.25917	2.989
			0.25945	2.98917
			0.25972	2.98055
			0.26	2.9907
			0.26028	2.98894
			0.26056	2.98142
			0.26083	2.98856
			0.26111	2.9902
			0.26139	2.98085
			0.26167	2.99091
			0.26195	2.99171
			0.26222	2.98118
			0.2625	2.9898
			0.26278	2.99209
			0.26306	2.9819
			0.26333	2.98995
			0.26361	2.99028
			0.26389	2.98213
			0.26417	2.991
			0.26445	2.99262
			0.26472	2.98394
			0.265	2.99127
			0.26528	2.99144
			0.26556	2.98194
			0.26583	2.99114
			0.26611	2.99221
			0.26639	2.98244
			0.26667	2.99064
			0.26695	2.99356
			0.26722	2.98293
			0.2675	2.99142
			0.26778	2.99184
			0.26806	2.98255
			0.26833	2.9923
			0.26861	2.99383
			0.26889	2.98331
			0.26917	2.99222
			0.26945	2.99409
			0.26972	2.98343
			0.27	2.99249
			0.27028	2.99377
			0.27056	2.98337
			0.27083	2.99196
			0.27111	2.99434
			0.27139	2.98308
			0.27167	2.99266
			0.27195	2.99354
			0.27222	2.98492
			0.2725	2.99337
			0.27278	2.99518
			0.27306	2.98417
			0.27333	2.99253
			0.27361	2.99648
			0.27389	2.98547
			0.27417	2.99318
			0.27445	2.99507
			0.27472	2.98537
			0.275	2.99217
			0.27528	2.99552
			0.27556	2.98585
			0.27583	2.99278
			0.27611	2.99518
			0.27639	2.98536
			0.27667	2.99425
			0.27695	2.99476
			0.27722	2.98557
			0.2775	2.99303
			0.27778	2.99625
			0.27806	2.98537
			0.27833	2.99297
			0.27861	2.99635
			0.27889	2.98612
			0.27917	2.99354
			0.27945	2.99812
			0.27972	2.98564
			0.28	2.99257
			0.28028	2.99675
			0.28056	2.98713
			0.28083	2.9935
			0.28111	2.99692
			0.28139	2.98728
			0.28167	2.99469
			0.28195	2.99619
			0.28222	2.98677
			0.2825	2.99331
			0.28278	2.99701
			0.28306	2.98772
			0.28333	2.99486
			0.28361	2.99877
			0.28389	2.98837
			0.28417	2.9952
			0.28445	2.99928
			0.28472	2.98898
			0.285	2.9947
			0.28528	2.99919
			0.28556	2.98963
			0.28583	2.99478
			0.28611	2.99953
			0.28639	2.989
			0.28667	2.99448
			0.28695	2.99884
			0.28722	2.9903
			0.2875	2.99499
			0.28778	2.99942
			0.28806	2.99013
			0.28833	2.99568
			0.28861	3.00133
			0.28889	2.99125
			0.28917	2.99619
			0.28945	3.0002
			0.28972	2.9911
			0.29	2.9952
			0.29028	3.00087
			0.29056	2.99125
			0.29083	2.99587
			0.29111	3.00094
			0.29139	2.99192
			0.29167	2.99606
			0.29195	3.00073
			0.29222	2.99207
			0.2925	2.99675
			0.29278	3.00144
			0.29306	2.99213
			0.29333	2.99631
			0.29361	3.00207
			0.29389	2.99295
			0.29417	2.9985
			0.29445	3.00033
			0.29472	2.99194
			0.295	2.99686
			0.29528	3.00264
			0.29556	2.99217
			0.29583	2.99778
			0.29611	3.00344
			0.29639	2.99388
			0.29667	2.99755
			0.29695	3.00321
			0.29722	2.99448
			0.2975	2.99783
			0.29778	3.00283
			0.29806	2.99499
			0.29833	2.99875
			0.29861	3.00424
			0.29889	2.99486
			0.29917	2.99799
			0.29945	3.00327
			0.29972	2.99583
			0.3	2.99762
			0.30028	3.00196
			0.30056	2.99516
			0.30083	2.99904
			0.30111	3.00337
			0.30139	2.99606
			0.30167	2.99963
			0.30195	3.00371
			0.30222	2.99491
			0.3025	2.99873
			0.30278	3.00407
			0.30306	2.99682
			0.30333	3.00024
			0.30361	3.00571
			0.30389	2.99715
			0.30417	3.00073
			0.30445	3.0048
			0.30472	2.99739
			0.305	3.00001
			0.30528	3.00459
			0.30556	2.99806
			0.30583	3.00094
			0.30611	3.00493
			0.30639	2.99766
			0.30667	3.00142
			0.30695	3.00596
			0.30722	2.99841
			0.3075	3.00094
			0.30778	3.00541
			0.30806	2.99879
			0.30833	3.00281
			0.30861	3.00663
			0.30889	2.99946
			0.30917	3.00289
			0.30945	3.00705
			0.30972	2.99955
			0.31	3.0022
			0.31028	3.00743
			0.31056	2.99989
			0.31083	3.00257
			0.31111	3.00684
			0.31139	3.00049
			0.31167	3.00295
			0.31195	3.00703
			0.31222	3.00117
			0.3125	3.00314
			0.31278	3.00781
			0.31306	3.00201
			0.31333	3.00411
			0.31361	3.00714
			0.31389	3.0022
			0.31417	3.00293
			0.31445	3.00751
			0.31472	3.00138
			0.315	3.00461
			0.31528	3.00831
			0.31556	3.00228
			0.31583	3.00369
			0.31611	3.00783
			0.31639	3.00188
			0.31667	3.00356
			0.31695	3.00718
			0.31722	3.00226
			0.3175	3.00476
			0.31778	3.0076
			0.31806	3.00331
			0.31833	3.00392
			0.31861	3.00894
			0.31889	3.00316
			0.31917	3.00539
			0.31945	3.00909
			0.31972	3.00337
			0.32	3.00522
			0.32028	3.00793
			0.32056	3.00384
			0.32083	3.006
			0.32111	3.01008
			0.32139	3.00434
			0.32167	3.00493
			0.32195	3.00777
			0.32222	3.00348
			0.3225	3.00667
			0.32278	3.01024
			0.32306	3.00384
			0.32333	3.00558
			0.32361	3.00957
			0.32389	3.00465
			0.32417	3.00606
			0.32445	3.00951
			0.32472	3.00466
			0.325	3.0076
			0.32528	3.00987
			0.32556	3.0059
			0.32583	3.00701
			0.32611	3.00922
			0.32639	3.0056
			0.32667	3.00795
			0.32695	3.01018
			0.32722	3.00447
			0.3275	3.00766
			0.32778	3.01016
			0.32806	3.00587
			0.32833	3.00776
			0.32861	3.01058
			0.32889	3.00529
			0.32917	3.00825
			0.32945	3.01096
			0.32972	3.00623
			0.33	3.00827
			0.33028	3.01048
			0.33056	3.00623
			0.33083	3.00919
			0.33111	3.01035
			0.33139	3.00608
			0.33167	3.00859
			0.33195	3.01079
			0.33222	3.0064
			0.3325	3.00871
			0.33278	3.00955
			0.33306	3.0064
			0.33333	3.00774
			0.33361	3.01067
			0.33389	3.00686
			0.33417	3.00966
			0.33445	3.01048
			0.33472	3.00655
			0.335	3.01073
			0.33528	3.01285
			0.33556	3.00819
			0.33583	3.01035
			0.33611	3.01066
			0.33639	3.00726
			0.33667	3.01022
			0.33695	3.01264
			0.33722	3.00928
			0.3375	3.01134
			0.33778	3.01235
			0.33806	3.00837
			0.33833	3.01058
			0.33861	3.0126
			0.33889	3.00846
			0.33917	3.01087
			0.33945	3.01207
			0.33972	3.00991
			0.34	3.01073
			0.34028	3.01211
			0.34056	3.00987
			0.34083	3.01102
			0.34111	3.01304
			0.34139	3.00915
			0.34167	3.01218
			0.34195	3.0131
			0.34222	3.00989
			0.3425	3.01172
			0.34278	3.01335
			0.34306	3.0109
			0.34333	3.01249
			0.34361	3.01369
			0.34389	3.01006
			0.34417	3.0118
			0.34445	3.01291
			0.34472	3.01041
			0.345	3.0127
			0.34528	3.01392
			0.34556	3.00991
			0.34583	3.01279
			0.34611	3.01413
			0.34639	3.01094
			0.34667	3.01294
			0.34695	3.01298
			0.34722	3.01136
			0.3475	3.013
			0.34778	3.01361
			0.34806	3.01174
			0.34833	3.01359
			0.34861	3.01438
			0.34889	3.01067
			0.34917	3.01316
			0.34945	3.01361
			0.34972	3.011
			0.35	3.01398
			0.35028	3.01415
			0.35056	3.01142
			0.35083	3.01424
			0.35111	3.01491
			0.35139	3.01163
			0.35167	3.01462
			0.35195	3.01495
			0.35222	3.01291
			0.3525	3.01537
			0.35278	3.01483
			0.35306	3.01199
			0.35333	3.01392
			0.35361	3.01522
			0.35389	3.01344
			0.35417	3.01562
			0.35445	3.01543
			0.35472	3.01274
			0.355	3.01495
			0.35528	3.01491
			0.35556	3.01247
			0.35583	3.01407
			0.35611	3.01556
			0.35639	3.01424
			0.35667	3.01562
			0.35695	3.01567
			0.35722	3.01333
			0.3575	3.01544
			0.35778	3.01518
			0.35806	3.01294
			0.35833	3.01552
			0.35861	3.01512
			0.35889	3.01352
			0.35917	3.01525
			0.35945	3.01602
			0.35972	3.0135
			0.36	3.01638
			0.36028	3.01657
			0.36056	3.01468
			0.36083	3.01516
			0.36111	3.0167
			0.36139	3.01335
			0.36167	3.01571
			0.36195	3.01632
			0.36222	3.01497
			0.3625	3.01712
			0.36278	3.01653
			0.36306	3.0148
			0.36333	3.01657
			0.36361	3.01642
			0.36389	3.01539
			0.36417	3.01718
			0.36445	3.01743
			0.36472	3.0155
			0.365	3.01657
			0.36528	3.01693
			0.36556	3.01518
			0.36583	3.01628
			0.36611	3.01705
			0.36639	3.01537
			0.36667	3.01772
			0.36695	3.01815
			0.36722	3.01544
			0.3675	3.01756
			0.36778	3.01869
			0.36806	3.01615
			0.36833	3.01714
			0.36861	3.01819
			0.36889	3.01564
			0.36917	3.018
			0.36945	3.01823
			0.36972	3.01607
			0.37	3.01785
			0.37028	3.01831
			0.37056	3.0159
			0.37083	3.01768
			0.37111	3.01894
			0.37139	3.01714
			0.37167	3.01976
			0.37195	3.01987
			0.37222	3.01813
			0.3725	3.01974
			0.37278	3.02031
			0.37306	3.01808
			0.37333	3.02025
			0.37361	3.01995
			0.37389	3.01752
			0.37417	3.01955
			0.37445	3.01968
			0.37472	3.0188
			0.375	3.01899
			0.37528	3.01941
			0.37556	3.0172
			0.37583	3.01958
			0.37611	3.02031
			0.37639	3.01844
			0.37667	3.01932
			0.37695	3.01997
			0.37722	3.01716
			0.3775	3.0205
			0.37778	3.01924
			0.37806	3.01834
			0.37833	3.02029
			0.37861	3.02134
			0.37889	3.01852
			0.37917	3.01997
			0.37945	3.02002
			0.37972	3.01871
			0.38	3.02046
			0.38028	3.02084
			0.38056	3.01884
			0.38083	3.01991
			0.38111	3.02104
			0.38139	3.01901
			0.38167	3.02063
			0.38195	3.02128
			0.38222	3.01884
			0.3825	3.02063
			0.38278	3.02077
			0.38306	3.01987
			0.38333	3.02008
			0.38361	3.02166
			0.38389	3.01936
			0.38417	3.0225
			0.38445	3.02149
			0.38472	3.01901
			0.385	3.02151
			0.38528	3.02166
			0.38556	3.02037
			0.38583	3.02104
			0.38611	3.02134
			0.38639	3.02029
			0.38667	3.02134
			0.38695	3.02178
			0.38722	3.01993
			0.3875	3.02126
			0.38778	3.02138
			0.38806	3.02109
			0.38833	3.02325
			0.38861	3.02315
			0.38889	3.02136
			0.38917	3.02237
			0.38945	3.02279
			0.38972	3.02084
			0.39	3.02178
			0.39028	3.02277
			0.39056	3.02126
			0.39083	3.02203
			0.39111	3.02254
			0.39139	3.02113
			0.39167	3.02191
			0.39195	3.02256
			0.39222	3.02153
			0.3925	3.02386
			0.39278	3.02361
			0.39306	3.02315
			0.39333	3.02315
			0.39361	3.02271
			0.39389	3.02184
			0.39417	3.02243
			0.39445	3.02329
			0.39472	3.02216
			0.395	3.02308
			0.39528	3.023
			0.39556	3.02258
			0.39583	3.02395
			0.39611	3.02357
			0.39639	3.0229
			0.39667	3.02296
			0.39695	3.02355
			0.39722	3.02331
			0.3975	3.02258
			0.39778	3.02443
			0.39806	3.02394
			0.39833	3.02445
			0.39861	3.02439
			0.39889	3.02321
			0.39917	3.02563
			0.39945	3.02422
			0.39972	3.02409
			0.4	3.0242
			0.40028	3.02451
			0.40056	3.02378
			0.40083	3.02342
			0.40111	3.02441
			0.40139	3.02518
			0.40167	3.02527
			0.40195	3.02462
			0.40222	3.02451
			0.4025	3.02561
			0.40278	3.02483
			0.40306	3.0238
			0.40333	3.02582
			0.40361	3.02491
			0.40389	3.02451
			0.40417	3.02588
			0.40445	3.02529
			0.40472	3.02483
			0.405	3.02586
			0.40528	3.02634
			0.40556	3.02489
			0.40583	3.02668
			0.40611	3.02613
			0.40639	3.02504
			0.40667	3.02577
			0.40695	3.02563
			0.40722	3.02546
			0.4075	3.02676
			0.40778	3.02455
			0.40806	3.02485
			0.40833	3.02619
			0.40861	3.02443
			0.40889	3.02445
			0.40917	3.02579
			0.40945	3.02539
			0.40972	3.02588
			0.41	3.02649
			0.41028	3.02548
			0.41056	3.02605
			0.41083	3.02703
			0.41111	3.0251
			0.41139	3.02518
			0.41167	3.02708
			0.41195	3.02565
			0.41222	3.02542
			0.4125	3.02756
			0.41278	3.02632
			0.41306	3.02775
			0.41333	3.02876
			0.41361	3.02569
			0.41389	3.02758
			0.41417	3.02762
			0.41445	3.02638
			0.41472	3.02657
			0.415	3.02966
			0.41528	3.02634
			0.41556	3.02788
			0.41583	3.02932
			0.41611	3.02693
			0.41639	3.02796
			0.41667	3.02884
			0.41695	3.02678
			0.41722	3.02775
			0.4175	3.02901
			0.41778	3.02758
			0.41806	3.02804
			0.41833	3.02996
			0.41861	3.02634
			0.41889	3.02806
			0.41917	3.0293
			0.41945	3.02811
			0.41972	3.0296
			0.42	3.0309
			0.42028	3.02775
			0.42056	3.02956
			0.42083	3.03094
			0.42111	3.02716
			0.42139	3.03078
			0.42167	3.03201
			0.42195	3.02798
			0.42222	3.02964
			0.4225	3.03086
			0.42278	3.02745
			0.42306	3.02926
			0.42333	3.0308
			0.42361	3.02655
			0.42389	3.02962
			0.42417	3.03107
			0.42445	3.028
			0.42472	3.03061
			0.425	3.03172
			0.42528	3.02802
			0.42556	3.03115
			0.42583	3.03132
			0.42611	3.02724
			0.42639	3.02996
			0.42667	3.03176
			0.42695	3.02834
			0.42722	3.03134
			0.4275	3.03157
			0.42778	3.0285
			0.42806	3.03187
			0.42833	3.03208
			0.42861	3.02769
			0.42889	3.03048
			0.42917	3.03216
			0.42945	3.02764
			0.42972	3.03147
			0.43	3.03206
			0.43028	3.02903
			0.43056	3.03149
			0.43083	3.0334
			0.43111	3.02809
			0.43139	3.03208
			0.43167	3.03258
			0.43195	3.02813
			0.43222	3.03134
			0.4325	3.03353
			0.43278	3.02869
			0.43306	3.03069
			0.43333	3.03241
			0.43361	3.02773
			0.43389	3.03185
			0.43417	3.03334
			0.43445	3.028
			0.43472	3.03115
			0.435	3.03233
			0.43528	3.02977
			0.43556	3.03655
			0.43583	3.03739
			0.43611	3.03775
			0.43639	3.03931
			0.43667	3.03991
			0.43695	3.0396
			0.43722	3.04197
			0.4375	3.04273
			0.43778	3.04187
			0.43806	3.04263
			0.43833	3.04269
			0.43861	3.03702
			0.43889	3.03592
			0.43917	3.03622
			0.43945	3.03941
			0.43972	3.03891
			0.44	3.04233
			0.44028	3.04332
			0.44056	3.04115
			0.44083	3.04498
			0.44111	3.04113
			0.44139	3.04242
			0.44167	3.04368
			0.44195	3.04317
			0.44222	3.04399
			0.4425	3.04336
			0.44278	3.04193
			0.44306	3.04309
			0.44333	3.04506
			0.44361	3.04351
			0.44389	3.04361
			0.44417	3.04281
			0.44445	3.04277
			0.44472	3.04216
			0.445	3.04311
			0.44528	3.04544
			0.44556	3.04397
			0.44583	3.04288
			0.44611	3.0441
			0.44639	3.04477
			0.44667	3.04551
			0.44695	3.04441
			0.44722	3.04212
			0.4475	3.04315
			0.44778	3.04405
			0.44806	3.04481
			0.44833	3.04414
			0.44861	3.04485
			0.44889	3.04506
			0.44917	3.04435
			0.44945	3.04681
			0.44972	3.04742
			0.45	3.04693
			0.45028	3.04779
			0.45056	3.04706
			0.45083	3.04788
			0.45111	3.04843
			0.45139	3.04803
			0.45167	3.0458
			0.45195	3.04836
			0.45222	3.04819
			0.4525	3.04716
			0.45278	3.04733
			0.45306	3.04899
			0.45333	3.04773
			0.45361	3.04675
			0.45389	3.04971
			0.45417	3.04924
			0.45445	3.05074
			0.45472	3.04945
			0.455	3.05004
			0.45528	3.04988
			0.45556	3.04966
			0.45583	3.05141
			0.45611	3.04882
			0.45639	3.05173
			0.45667	3.05088
			0.45695	3.04943
			0.45722	3.05044
			0.4575	3.05217
			0.45778	3.05088
			0.45806	3.04992
			0.45833	3.0503
			0.45861	3.05145
			0.45889	3.05067
			0.45917	3.05158
			0.45945	3.05175
			0.45972	3.05244
			0.46	3.05093
			0.46028	3.05086
			0.46056	3.05208
			0.46083	3.05261
			0.46111	3.0513
			0.46139	3.05193
			0.46167	3.05164
			0.46195	3.05196
			0.46222	3.05143
			0.4625	3.05208
			0.46278	3.05273
			0.46306	3.05233
			0.46333	3.05301
			0.46361	3.05231
			0.46389	3.05317
			0.46417	3.05277
			0.46445	3.05229
			0.46472	3.05215
			0.465	3.05439
			0.46528	3.0537
			0.46556	3.05465
			0.46583	3.05402
			0.46611	3.0537
			0.46639	3.055
			0.46667	3.05414
			0.46695	3.05547
			0.46722	3.055
			0.4675	3.05607
			0.46778	3.05607
			0.46806	3.05433
			0.46833	3.05723
			0.46861	3.05538
			0.46889	3.05725
			0.46917	3.05568
			0.46945	3.05654
			0.46972	3.05549
			0.47	3.05689
			0.47028	3.05927
			0.47056	3.05807
			0.47083	3.05813
			0.47111	3.05786
			0.47139	3.05734
			0.47167	3.05725
			0.47195	3.05839
			0.47222	3.05603
			0.4725	3.05916
			0.47278	3.05973
			0.47306	3.05874
			0.47333	3.05765
			0.47361	3.05971
			0.47389	3.05931
			0.47417	3.05908
			0.47445	3.05992
			0.47472	3.06015
			0.475	3.0596
			0.47528	3.05981
			0.47556	3.06036
			0.47583	3.05918
			0.47611	3.06122
			0.47639	3.06181
			0.47667	3.0621
			0.47695	3.06183
			0.47722	3.0591
			0.4775	3.06183
			0.47778	3.06051
			0.47806	3.0625
			0.47833	3.05899
			0.47861	3.06112
			0.47889	3.0592
			0.47917	3.06005
			0.47945	3.06244
			0.47972	3.06169
			0.48	3.064
			0.48028	3.06171
			0.48056	3.06085
			0.48083	3.0619
			0.48111	3.0619
			0.48139	3.06181
			0.48167	3.06156
			0.48195	3.06414
			0.48222	3.06148
			0.4825	3.06303
			0.48278	3.067
			0.48306	3.06368
			0.48333	3.06463
			0.48361	3.06501
			0.48389	3.06683
			0.48417	3.06379
			0.48445	3.06692
			0.48472	3.06334
			0.485	3.0653
			0.48528	3.06597
			0.48556	3.06557
			0.48583	3.06339
			0.48611	3.06419
			0.48639	3.06536
			0.48667	3.06585
			0.48695	3.06492
			0.48722	3.06435
			0.4875	3.06622
			0.48778	3.06477
			0.48806	3.06578
			0.48833	3.06625
			0.48861	3.06616
			0.48889	3.06673
			0.48917	3.06894
			0.48945	3.06894
			0.48972	3.06652
			0.49	3.06503
			0.49028	3.06736
			0.49056	3.06786
			0.49083	3.06828
			0.49111	3.06648
			0.49139	3.0679
			0.49167	3.06967
			0.49195	3.06828
			0.49222	3.06952
			0.4925	3.0706
			0.49278	3.06967
			0.49306	3.06812
			0.49333	3.06999
			0.49361	3.06809
			0.49389	3.06912
			0.49417	3.06851
			0.49445	3.06927
			0.49472	3.06982
			0.495	3.06967
			0.49528	3.06931
			0.49556	3.07019
			0.49583	3.06858
			0.49611	3.07171
			0.49639	3.06946
			0.49667	3.07125
			0.49695	3.06963
			0.49722	3.07024
			0.4975	3.0719
			0.49778	3.07286
			0.49806	3.07144
			0.49833	3.0715
			0.49861	3.0732
			0.49889	3.07249
			0.49917	3.07385
			0.49945	3.07146
			0.49972	3.07291
			0.5	3.07135
			0.50028	3.0727
			0.50056	3.07415
			0.50083	3.07547
			0.50111	3.07415
			0.50139	3.07412
			0.50167	3.07585
			0.50195	3.07438
			0.50222	3.07536
			0.5025	3.07589
			0.50278	3.07537
			0.50306	3.07314
			0.50333	3.07734
			0.50361	3.07614
			0.50389	3.07597
			0.50417	3.07724
			0.50445	3.07755
			0.50472	3.07497
			0.505	3.07625
			0.50528	3.07715
			0.50556	3.07835
			0.50583	3.07982
			0.50611	3.07736
			0.50639	3.07696
			0.50667	3.07908
			0.50695	3.08045
			0.50722	3.07997
			0.5075	3.07766
			0.50778	3.0774
			0.50806	3.07847
			0.50833	3.07946
			0.50861	3.07852
			0.50889	3.08072
			0.50917	3.08003
			0.50945	3.07953
			0.50972	3.08098
			0.51	3.08062
			0.51028	3.08163
			0.51056	3.07978
			0.51083	3.08245
			0.51111	3.08314
			0.51139	3.08285
			0.51167	3.08186
			0.51195	3.08295
			0.51222	3.0814
			0.5125	3.08116
			0.51278	3.08375
			0.51306	3.08528
			0.51333	3.08375
			0.51361	3.08438
			0.51389	3.08345
			0.51417	3.08491
			0.51445	3.08305
			0.51472	3.08616
			0.515	3.08448
			0.51528	3.08642
			0.51556	3.08736
			0.51583	3.0864
			0.51611	3.0872
			0.51639	3.0878
			0.51667	3.08761
			0.51695	3.08623
			0.51722	3.08696
			0.5175	3.08793
			0.51778	3.08806
			0.51806	3.08753
			0.51833	3.08995
			0.51861	3.08869
			0.51889	3.09104
			0.51917	3.0873
			0.51945	3.0918
			0.51972	3.09159
			0.52	3.09123
			0.52028	3.0915
			0.52056	3.09497
			0.52083	3.09297
			0.52111	3.09466
			0.52139	3.09218
			0.52167	3.09476
			0.52195	3.09436
			0.52222	3.09482
			0.5225	3.09312
			0.52278	3.09507
			0.52306	3.09715
			0.52333	3.09342
			0.52361	3.09522
			0.52389	3.09695
			0.52417	3.09699
			0.52445	3.09722
			0.52472	3.09892
			0.525	3.09537
			0.52528	3.09932
			0.52556	3.10121
			0.52583	3.09289
			0.52611	3.09608
			0.52639	3.09797
			0.52667	3.09625
			0.52695	3.09594
			0.52722	3.09497
			0.5275	3.0969
			0.52778	3.09619
			0.52806	3.0952
			0.52833	3.09321
			0.52861	3.09331
			0.52889	3.09207
			0.52917	3.09268
			0.52945	3.09171
			0.52972	3.09211
			0.53	3.09253
			0.53028	3.09598
			0.53056	3.09266
			0.53083	3.09608
			0.53111	3.065
			0.53139	3.05628
			0.53167	3.05458
			0.53195	3.05277
			0.53222	3.05095
			0.5325	3.05324
			0.53278	3.04742
			0.53306	3.0529
			0.53333	3.05088
			0.53361	3.0413
			0.53389	3.04769
			0.53417	3.05265
			0.53445	3.04542
			0.53472	3.04771
			0.535	3.05233
			0.53528	3.04429
			0.53556	3.0449
			0.53583	3.05135
			0.53611	3.04466
			0.53639	3.04708
			0.53667	3.05172
			0.53695	3.04437
			0.53722	3.04672
			0.5375	3.05229
			0.53778	3.0442
			0.53806	3.04572
			0.53833	3.05149
			0.53861	3.04468
			0.53889	3.0483
			0.53917	3.05093
			0.53945	3.04347
			0.53972	3.04687
			0.54	3.0507
			0.54028	3.04387
			0.54056	3.04708
			0.54083	3.05179
			0.54111	3.04429
			0.54139	3.04756
			0.54167	3.05112
			0.54195	3.04519
			0.54222	3.04725
			0.5425	3.05187
			0.54278	3.04427
			0.54306	3.04721
			0.54333	3.05063
			0.54361	3.04441
			0.54389	3.04754
			0.54417	3.05175
			0.54445	3.04481
			0.54472	3.04765
			0.545	3.05093
			0.54528	3.04496
			0.54556	3.04653
			0.54583	3.05128
			0.54611	3.0449
			0.54639	3.04859
			0.54667	3.05177
			0.54695	3.04544
			0.54722	3.04872
			0.5475	3.05042
			0.54778	3.04529
			0.54806	3.04834
			0.54833	3.05067
			0.54861	3.04492
			0.54889	3.04826
			0.54917	3.05051
			0.54945	3.04548
			0.54972	3.04769
			0.55	3.05034
			0.55028	3.04511
			0.55056	3.0484
			0.55083	3.05055
[truncated: 358,918+ more rows]
